# Supplementary material
Source: MDPI journal article supplement (https://www.mdpi.com/1996-1073/16/1/541)
Supplement: s1 [file s1]

**Table S1:** Classes of compounds, summation of peak areas, CAS number, and retention times of chemical compounds identified by GC-MS in bio-oil by thermal cracking of WEEE plastic at 350 °C, 1.0 atm, Reaction time=30 min, in semi-pilot scale two-stage reactor of 2.0 L.

| Chemical Compound                                         | RT (min)        | CAS         | wi(%Area)     |
|-----------------------------------------------------------|-----------------|-------------|---------------|
| <b>Aromatic Hydrocarbons</b>                              | <b>Σ(%area)</b> |             | <b>53.723</b> |
| Styrene                                                   | 9.728           | 100-42-5    | 9.547         |
| Benzene, (1-methylethyl)-                                 | 10.710          | 98-82-8     | 4.194         |
| Benzene, propyl-                                          | 11.688          | 103-65-1    | 0.220         |
| α-Methylstyrene                                           | 12.584          | 98-83-9     | 6.413         |
| Benzene, 1-propenyl-                                      | 14.092          | 637-50-3    | 0.521         |
| Indene                                                    | 14.849          | 95-13-6     | 0.267         |
| Biphenyl                                                  | 25.017          | 92-52-4     | 0.281         |
| Diphenylmethane                                           | 26.329          | 101-81-5    | 0.586         |
| Benzene, 1,1'-ethylidenebis-                              | 27.764          | 612-00-0    | 0.485         |
| Bibenzyl                                                  | 28.688          | 103-29-7    | 0.427         |
| Benzene, 1,1'-(1,3-propanediyl)bis-                       | 32.085          | 1081-75-0   | 12.752        |
| Benzene, 1,1'-(3-methyl-1-propene-1,3-diyl)bis-           | 32.412          | 7614-93-9   | 1.244         |
| Benzene, 1,1'-(1-methyl-1,3-propanediyl)bis-              | 32.600          | 1520-44-1   | 1.677         |
| 1,2-Diphenylcyclopropane                                  | 33.636          | 29881-14-9  | 2.268         |
| Benzene, 1,1'-(1,4-butanediyl)bis-                        | 34.021          | 1083-56-3   | 0.541         |
| Benzene, 1,1'-(3-methyl-1-propene-1,3-diyl)bis-           | 34.386          | 7614-93-9   | 0.767         |
| Benzene, 1,1'-(1,1,2,2-tetramethyl-1,2-ethanediyl)bis-    | 34.748          | 1889-67-4   | 0.597         |
| Benzene, 1,1'-(2-methyl-1-propenylidene)bis-              | 34.898          | 781-33-9    | 1.998         |
| 1-(4-Methylphenyl)-4-phenylbuta-1,3-diene                 | 36.410          | 37985-11-8  | 0.410         |
| 1H-Indene, 2-phenyl-                                      | 36.860          | 4505-48-0   | 0.270         |
| 1,2,3,4-Tetrahydro-1-phenyl-1,2,3-methanonaphthalene      | 40.387          | 138089-69-7 | 0.492         |
| Benzene, 1,1'-[3-(2-phenylethylidene)-1,5-pentanediy]bis- | 44.682          | 55334-57-1  | 1.773         |
| Benzene, (1-methylhexadecyl)-                             | 45.088          | 55125-25-2  | 0.471         |
| p-Terphenyl                                               | 45.436          | 92-94-4     | 0.300         |
| 1-Propene, 3-(2-cyclopentenyl)-2-methyl-1,1-diphenyl-     | 49.302          | -           | 0.886         |
| Benzene, 1,1'-(1,4-dimethyl-1-butene-1,4-diyl)bis-        | 51.646          | 52161-54-3  | 0.592         |
| 1-Propene, 3-(2-cyclopentenyl)-2-methyl-1,1-diphenyl-     | 53.449          | -           | 2.474         |
| 1,1':3',1''-Terphenyl, 5'-phenyl-                         | 68.109          | 612-71-5    | 1.270         |
| <b>Polycyclic aromatic hydrocarbons (PAH)</b>             | <b>Σ(%area)</b> |             | <b>8.239</b>  |
| Naphthalene                                               | 19.491          | 91-20-3     | 0.556         |
| Naphthalene, 1-methyl-                                    | 22.770          | 90-12-0     | 0.370         |
| Naphthalene, 2-methyl-                                    | 23.259          | 91-57-6     | 0.472         |
| Naphthalene, 1,2,3,4-tetrahydro-1-phenyl-                 | 34.473          | 3018-20-0   | 0.600         |
| Naphthalene, 1,2,3,4-tetrahydro-6-(phenylmethyl)-         | 35.372          | 35310-85-1  | 0.314         |
| Naphthalene, 1-phenyl-                                    | 36.578          | 605-02-7    | 2.056         |
| Naphthalene, 2-phenyl-                                    | 40.019          | 612-94-2    | 1.958         |

|                                                                                      |                 |             |               |
|--------------------------------------------------------------------------------------|-----------------|-------------|---------------|
| Naphthalene, 2-(phenylmethyl)-                                                       | 44.292          | 613-59-2    | 1.913         |
| <b>Nitrogenated Compounds</b>                                                        | <b>Σ(%area)</b> |             | <b>21.888</b> |
| Benzyl nitrile                                                                       | 17.566          | 140-29-4    | 0.340         |
| Benzeneacetonitrile, α-methyl-                                                       | 18.434          | 1823-91-2   | 0.557         |
| Benzenepropanenitrile                                                                | 20.642          | 645-59-0    | 0.240         |
| 1,2-Benzenedicarbonitrile                                                            | 21.230          | 91-15-6     | 0.302         |
| Cyclopropanecarbonitrile, 2-phenyl-, trans-                                          | 22.408          | 5590-14-7   | 0.290         |
| Benzenebutanenitrile                                                                 | 23.461          | 2046-18-6   | 11.716        |
| quinoline, 1,2-dihydro-1-methyl-2-methylene-                                         | 24.133          |             | 0.630         |
| 3-Benzyl-4,5-dihydro-3H-pyrrole                                                      | 24.347          | -           | 1.539         |
| 1,2,3,3a-Tetrahydropentalene, 1,1-dimethyl-3-cyanomethylene-                         | 24.851          | -           | 0.174         |
| Cyclopropanecarbonitrile, 2-phenyl-, trans-                                          | 25.772          | 5590-14-7   | 0.269         |
| 1H-Pyrrole, 1-(4-methylphenyl)-                                                      | 26.122          | 827-60-1    | 0.171         |
| Quinoline, 4-ethyl-                                                                  | 27.451          | 19020-26-9  | 0.320         |
| Naphthalene, 1-isocyano- (cis)                                                       | 28.187          | -           | 0.913         |
| Naphthalene, 1-isocyano- (trans)                                                     | 28.899          | -           | 0.561         |
| 1-Naphthaleneacetonitrile                                                            | 32.306          | 132-75-2    | 0.964         |
| Octadecanenitrile                                                                    | 43.043          | 638-65-3    | 0.743         |
| 4-Methyl-3-(O-methylbenzyl)pentanenitrile                                            | 43.877          | 29107-40-2  | 0.670         |
| (1-Benzyl-2-O-tolyl-ethyl)-isonitrile                                                | 44.445          | -           | 0.804         |
| Naphthalene-1,3,3-tricarbonitrile, 3,4,4a,5,6,7-hexahdro-2-amino-4-(4-methylphenyl)- | 49.680          | 163978-39-0 | 0.324         |
| Naphthalene-1,3,3-tricarbonitrile, 3,4,4a,5,6,7-hexahdro-2-amino-4-(4-methylphenyl)- | 50.370          | 163978-39-0 | 0.361         |
| <b>Brominated Compounds</b>                                                          | <b>Σ(%area)</b> |             | <b>0.741</b>  |
| Phenol, 2-bromo-                                                                     | 15.591          | 95-56-7     | 0.360         |
| 5-Bromo-2-methoxy-1,3-dimethylbenzene                                                | 23.559          | -           | 0.381         |
| <b>Oxygenated Compounds</b>                                                          | <b>Σ(%area)</b> |             | <b>12.843</b> |
| Phenol                                                                               | 12.146          | 108-95-2    | 3.272         |
| Phenol, 2-methyl-                                                                    | 14.630          | 95-48-7     | 0.589         |
| Benzenemethanol, α-methyl-, (R)-                                                     | 15.082          | 1517-69-7   | 0.267         |
| Benzenemethanol, α,α-dimethyl-                                                       | 15.904          | 617-94-7    | 1.400         |
| Phenol, 2,5-dimethyl-                                                                | 16.580          | 95-87-4     | 0.380         |
| p-Cumenol                                                                            | 20.028          | 99-89-8     | 4.554         |
| Phenol, 2-methyl-5-(1-methylethyl)-                                                  | 22.055          | 499-75-2    | 0.180         |
| Phenol, 2-(1-phenylethyl)-                                                           | 33.240          | 4237-44-9   | 0.475         |
| As-Indacen-1(2H)-one, 3,6,7,8-tetrahydro-3,3,6,6-tetramethyl-                        | 45.613          | 55591-18-9  | 0.847         |
| Benzaldehyde, 2-methyl-, (2,4-dinitrophenyl)hydrazone                                | 50.785          | 1773-44-0   | 0.879         |
| <b>Non Identified fraction</b>                                                       | <b>Σ(%area)</b> |             | <b>2.562</b>  |

**Table S2:** Classes of compounds, summation of peak areas, CAS number, and retention times of chemical compounds identified by GC-MS in bio-oil by thermal cracking of WEEE plastic at 350 °C, 1.0 atm, Reaction time=45 min, in semi-pilot scale two-stage reactor of 2.0 L.

| Chemical Compound                                            | RT (min)                          | CAS         | wi(%Area)     |
|--------------------------------------------------------------|-----------------------------------|-------------|---------------|
| <b>Aromatic Hydrocarbons</b>                                 | <b><math>\Sigma</math>(%area)</b> |             | <b>46.065</b> |
| Styrene                                                      | 9.728                             | 100-42-5    | 5.149         |
| Benzene, (1-methylethyl)-                                    | 10.710                            | 98-82-8     | 3.147         |
| Benzene, propyl-                                             | 11.688                            | 103-65-1    | 0.166         |
| $\alpha$ -Methylstyrene                                      | 12.584                            | 98-83-9     | 4.785         |
| Benzene, 1-propenyl-                                         | 14.092                            | 637-50-3    | 0.395         |
| Biphenyl                                                     | 25.017                            | 92-52-4     | 0.243         |
| Diphenylmethane                                              | 26.329                            | 101-81-5    | 0.630         |
| Benzene, 1,1'-ethylenedibis-                                 | 27.764                            | 612-00-0    | 0.544         |
| Bibenzyl                                                     | 28.688                            | 103-29-7    | 0.523         |
| Benzene, 1,1'-(1,3-propanediyl)bis-                          | 32.085                            | 1081-75-0   | 16.058        |
| Benzene, 1,1'-(3-methyl-1-propene-1,3-diyl)bis-              | 32.412                            | 7614-93-9   | 1.138         |
| Benzene, 1,1'-(1-methyl-1,3-propanediyl)bis-                 | 32.600                            | 1520-44-1   | 2.553         |
| 1,2-Diphenylcyclopropane                                     | 33.636                            | 29881-14-9  | 2.110         |
| Benzene, 1,1'-(1,4-butanediyl)bis-                           | 34.021                            | 1083-56-3   | 0.653         |
| Benzene, 1,1'-(3-methyl-1-propene-1,3-diyl)bis-              | 34.386                            | 7614-93-9   | 0.652         |
| Benzene, 1,1'-(1,1,2,2-tetramethyl-1,2-ethanediyl)bis-       | 34.748                            | 1889-67-4   | 0.577         |
| Benzene, 1,1'-(2-methyl-1-propenylenedibis)-                 | 34.898                            | 781-33-9    | 1.617         |
| 1-(4-Methylphenyl)-4-phenylbuta-1,3-diene                    | 36.410                            | 37985-11-8  | 0.472         |
| 1H-Indene, 2-phenyl-                                         | 36.860                            | 4505-48-0   | 0.163         |
| Benzene, 1,1'-[3-(2-phenylethylenedibis)-1,5-pentanediy]bis- | 44.682                            | 55334-57-1  | 1.411         |
| Benzene, (1-methylhexadecyl)-                                | 45.088                            | 55125-25-2  | 0.432         |
| p-Terphenyl                                                  | 45.436                            | 92-94-4     | 0.255         |
| 1-Propene, 3-(2-cyclopentenyl)-2-methyl-1,1-diphenyl-        | 49.302                            | -           | 0.380         |
| Benzene, 1,1'-(1,4-dimethyl-1-butene-1,4-diyl)bis-           | 51.646                            | 52161-54-3  | 0.402         |
| 1-Propene, 3-(2-cyclopentenyl)-2-methyl-1,1-diphenyl-        | 53.449                            | -           | 0.844         |
| 1,1':3',1''-Terphenyl, 5'-phenyl-                            | 68.109                            | 612-71-5    | 0.766         |
| <b>Polycyclic aromatic hydrocarbons (PAH)</b>                | <b><math>\Sigma</math>(%area)</b> |             | <b>10.074</b> |
| Naphthalene                                                  | 19.491                            | 91-20-3     | 0.515         |
| Naphthalene, 1-methyl-                                       | 22.770                            | 90-12-0     | 0.376         |
| Naphthalene, 2-methyl-                                       | 23.259                            | 91-57-6     | 0.482         |
| Naphthalene, 1-isocyano- (cis)                               | 28.187                            | -           | 1.228         |
| Naphthalene, 1-isocyano- (trans)                             | 28.899                            | -           | 0.554         |
| Naphthalene, 1,2,3,4-tetrahydro-1-phenyl-                    | 34.473                            | 3018-20-0   | 0.633         |
| Naphthalene, 1-phenyl-                                       | 36.578                            | 605-02-7    | 2.530         |
| Naphthalene, 2-phenyl-                                       | 40.019                            | 612-94-2    | 1.727         |
| 1,2,3,4-Tetrahydro-1-phenyl-1,2,3-methanonaphthalene         | 40.387                            | 138089-69-7 | 0.443         |
| Naphthalene, 2-(phenylmethyl)-                               | 44.292                            | 613-59-2    | 1.586         |
| <b>Nitrogenated Compounds</b>                                | <b><math>\Sigma</math>(%area)</b> |             | <b>23.439</b> |

|                                                                                       |                                    |             |               |
|---------------------------------------------------------------------------------------|------------------------------------|-------------|---------------|
| Benzyl nitrile                                                                        | 17.566                             | 140-29-4    | 0.321         |
| Benzeneacetonitrile, $\alpha$ -methyl-                                                | 18.434                             | 1823-91-2   | 0.609         |
| Benzenepropanenitrile                                                                 | 20.642                             | 645-59-0    | 0.282         |
| 1,2-Benzenedicarbonitrile                                                             | 21.230                             | 91-15-6     | 0.635         |
| Cyclopropanecarbonitrile, 2-phenyl-, trans-                                           | 22.408                             | 5590-14-7   | 0.285         |
| Benzenebutanenitrile                                                                  | 23.461                             | 2046-18-6   | 13.644        |
| quinoline, 1,2-dihydro-1-methyl-2-methylene-                                          | 24.133                             |             | 0.763         |
| 3-Benzyl-4,5-dihydro-3H-pyrrole                                                       | 24.347                             | -           | 2.155         |
| 1,2,3,3a-Tetrahydropentalene, 1,1-dimethyl-3-cyanomethylene-                          | 24.851                             | -           | 0.194         |
| Cyclopropanecarbonitrile, 2-phenyl-, trans-                                           | 25.772                             | 5590-14-7   | 0.251         |
| 1H-Pyrrole, 1-(4-methylphenyl)-                                                       | 26.122                             | 827-60-1    | 0.349         |
| Quinoline, 4-ethyl-                                                                   | 27.451                             | 19020-26-9  | 0.321         |
| 1-Naphthaleneacetonitrile                                                             | 32.306                             | 132-75-2    | 0.919         |
| Octadecanenitrile                                                                     | 43.043                             | 638-65-3    | 0.832         |
| 4-Methyl-3-(O-methylbenzyl)pentanenitrile                                             | 43.877                             | 29107-40-2  | 0.612         |
| (1-Benzyl-2-O-tolyl-ethyl)-isonitrile                                                 | 44.445                             | -           | 0.624         |
| Naphthalene-1,3,3-tricarbonitrile, 3,4,4a,5,6,7-hexahydro-2-amino-4-(4-methylphenyl)- | 49.680                             | 163978-39-0 | 0.307         |
| Naphthalene-1,3,3-tricarbonitrile, 3,4,4a,5,6,7-hexahydro-2-amino-4-(4-methylphenyl)- | 50.370                             | 163978-39-0 | 0.336         |
| <b>Brominated Compounds</b>                                                           | <b><math>\Sigma</math>(%.area)</b> |             | <b>0.600</b>  |
| Phenol, 2-bromo-                                                                      | 15.591                             | 95-56-7     | 0.296         |
| 5-Bromo-2-methoxy-1,3-dimethylbenzene                                                 | 23.559                             | -           | 0.304         |
| <b>Oxygenated Compounds</b>                                                           | <b><math>\Sigma</math>(%.area)</b> |             | <b>17.733</b> |
| Phenol                                                                                | 12.146                             | 108-95-2    | 4.980         |
| Phenol, 2-methyl-                                                                     | 14.630                             | 95-48-7     | 0.577         |
| Benzenemethanol, $\alpha,\alpha$ -dimethyl-                                           | 15.904                             | 617-94-7    | 1.240         |
| Phenol, 2,5-dimethyl-                                                                 | 16.580                             | 95-87-4     | 0.428         |
| p-Cumenol                                                                             | 20.028                             | 99-89-8     | 8.430         |
| Phenol, 2-methyl-5-(1-methylethyl)-                                                   | 22.055                             | 499-75-2    | 0.288         |
| Phenol, 2-(1-phenylethyl)-                                                            | 33.240                             | 4237-44-9   | 0.702         |
| 2,3-Dimethyl-1,4,4a,9a-tetrahydroanthracene-9,10-dione                                | 37.226                             | 2670-23-7   | 0.374         |
| As-Indacen-1(2H)-one, 3,6,7,8-tetrahydro-3,3,6,6-tetramethyl-                         | 45.613                             | 55591-18-9  | 0.212         |
| Benzaldehyde, 2-methyl-, (2,4-dinitrophenyl)hydrazone                                 | 50.785                             | 1773-44-0   | 0.502         |
| <b>Non identified fraction</b>                                                        | <b><math>\Sigma</math>(%.area)</b> |             | <b>2.092</b>  |

**Table S3:** Classes of compounds, summation of peak areas, CAS number, and retention times of chemical compounds identified by GC-MS in bio-oil by thermal cracking of WEEE plastic at 350 °C, 1.0 atm, Reaction time=60 min, in semi-pilot scale two-stage reactor of 2.0 L.

| Chemical Compound                                         | RT (min)        | CAS         | wi(%Area)     |
|-----------------------------------------------------------|-----------------|-------------|---------------|
| <b>Aromatic Hydrocarbons</b>                              | <b>Σ(%area)</b> |             | <b>48.440</b> |
| Styrene                                                   | 9.728           | 100-42-5    | 7.678         |
| Benzene, (1-methylethyl)-                                 | 10.710          | 98-82-8     | 4.467         |
| Benzene, propyl-                                          | 11.688          | 103-65-1    | 0.212         |
| α-Methylstyrene                                           | 12.584          | 98-83-9     | 5.289         |
| Benzene, 1-propenyl-                                      | 14.092          | 637-50-3    | 0.435         |
| Biphenyl                                                  | 25.017          | 92-52-4     | 0.207         |
| Diphenylmethane                                           | 26.329          | 101-81-5    | 0.639         |
| Benzene, 1,1'-ethylidenebis-                              | 27.764          | 612-00-0    | 0.515         |
| Bibenzyl                                                  | 28.688          | 103-29-7    | 0.493         |
| Benzene, 1,1'-(1,3-propanediyl)bis-                       | 32.085          | 1081-75-0   | 16.254        |
| Benzene, 1,1'-(3-methyl-1-propene-1,3-diyl)bis-           | 32.412          | 7614-93-9   | 1.151         |
| Benzene, 1,1'-(1-methyl-1,3-propanediyl)bis-              | 32.600          | 1520-44-1   | 2.589         |
| 1,2-Diphenylcyclopropane                                  | 33.636          | 29881-14-9  | 2.236         |
| Benzene, 1,1'-(1,4-butanediyl)bis-                        | 34.021          | 1083-56-3   | 0.707         |
| Benzene, 1,1'-(3-methyl-1-propene-1,3-diyl)bis-           | 34.386          | 7614-93-9   | 0.616         |
| Benzene, 1,1'-(2-methyl-1-propenylidene)bis-              | 34.898          | 781-33-9    | 1.314         |
| 1-(4-Methylphenyl)-4-phenylbuta-1,3-diene                 | 36.410          | 37985-11-8  | 0.503         |
| Benzene, 1,1'-[3-(2-phenylethylidene)-1,5-pentanediy]bis- | 44.682          | 55334-57-1  | 1.370         |
| Benzene, (1-methylhexadecyl)-                             | 45.088          | 55125-25-2  | 0.379         |
| p-Terphenyl                                               | 45.436          | 92-94-4     | 0.246         |
| 1-Propene, 3-(2-cyclopentenyl)-2-methyl-1,1-diphenyl-     | 49.302          | -           | 0.307         |
| Benzene, 1,1'-(1,4-dimethyl-1-butene-1,4-diyl)bis-        | 51.646          | 52161-54-3  | 0.338         |
| 1-Propene, 3-(2-cyclopentenyl)-2-methyl-1,1-diphenyl-     | 53.449          | -           | 0.495         |
| <b>Polycyclic aromatic hydrocarbons (PAH)</b>             | <b>Σ(%area)</b> |             | <b>9.043</b>  |
| Naphthalene                                               | 19.491          | 91-20-3     | 0.473         |
| Naphthalene, 1-methyl-                                    | 22.770          | 90-12-0     | 0.345         |
| Naphthalene, 2-methyl-                                    | 23.259          | 91-57-6     | 0.455         |
| Naphthalene, 1-isocyano-                                  | 28.187          | 09/04/1984  | 1.274         |
| Naphthalene, 1,2,3,4-tetrahydro-1-phenyl-                 | 34.473          | 3018-20-0   | 0.633         |
| Naphthalene, 1-phenyl-                                    | 36.578          | 605-02-7    | 2.549         |
| Naphthalene, 2-phenyl-                                    | 40.019          | 612-94-2    | 1.719         |
| 1,2,3,4-Tetrahydro-1-phenyl-1,2,3-methanonaphthalene      | 40.387          | 138089-69-7 | 0.422         |
| Naphthalene, 2-(phenylmethyl)-                            | 44.292          | 613-59-2    | 1.533         |
| <b>Nitrogenated Compounds</b>                             | <b>Σ(%area)</b> |             | <b>23.644</b> |
| Benzyl nitrile                                            | 17.566          | 140-29-4    | 0.327         |
| Benzeneacetonitrile, α-methyl-                            | 18.434          | 1823-91-2   | 0.578         |
| Benzenepropanenitrile                                     | 20.642          | 645-59-0    | 0.276         |
| 1,2-Benzenedicarbonitrile                                 | 21.230          | 91-15-6     | 0.612         |

|                                                                                       |                                    |             |               |
|---------------------------------------------------------------------------------------|------------------------------------|-------------|---------------|
| Cyclopropanecarbonitrile, 2-phenyl-, trans-                                           | 22.408                             | 5590-14-7   | 0.300         |
| Benzenebutanenitrile                                                                  | 23.461                             | 2046-18-6   | 13.413        |
| quinoline, 1,2-dihydro-1-methyl-2-methylene-                                          | 24.133                             |             | 0.806         |
| 3-Benzyl-4,5-dihydro-3H-pyrrole                                                       | 24.347                             | -           | 2.244         |
| 1,2,3,3a-Tetrahydropentalene, 1,1-dimethyl-3-cyanomethylene-                          | 24.851                             | -           | 0.229         |
| Cyclopropanecarbonitrile, 2-phenyl-, trans-                                           | 25.772                             | 5590-14-7   | 0.170         |
| 1H-Pyrrole, 1-(4-methylphenyl)-                                                       | 26.122                             | 827-60-1    | 0.351         |
| Quinoline, 4-ethyl-                                                                   | 27.451                             | 19020-26-9  | 0.285         |
| Naphthalene, 1-isocyano-                                                              | 28.899                             | 09/04/1984  | 0.563         |
| 1-Naphthaleneacetonitrile                                                             | 32.306                             | 132-75-2    | 0.933         |
| Octadecanenitrile                                                                     | 43.043                             | 638-65-3    | 0.744         |
| 4-Methyl-3-(O-methylbenzyl)pentanenitrile                                             | 43.877                             | 29107-40-2  | 0.646         |
| (1-Benzyl-2-O-tolyl-ethyl)-isonitrile                                                 | 44.445                             | -           | 0.582         |
| Naphthalene-1,3,3-tricarbonitrile, 3,4,4a,5,6,7-hexahydro-2-amino-4-(4-methylphenyl)- | 49.680                             | 163978-39-0 | 0.279         |
| Naphthalene-1,3,3-tricarbonitrile, 3,4,4a,5,6,7-hexahydro-2-amino-4-(4-methylphenyl)- | 50.370                             | 163978-39-0 | 0.306         |
| <b>Brominated Compounds</b>                                                           | <b><math>\Sigma</math>(%.area)</b> |             | <b>0.348</b>  |
| Phenol, 2-bromo-                                                                      | 15.591                             | 95-56-7     | 0.212         |
| 5-Bromo-2-methoxy-1,3-dimethylbenzene                                                 | 23.559                             | -           | 0.136         |
| <b>Oxygenated Compounds</b>                                                           | <b><math>\Sigma</math>(%.area)</b> |             | <b>15.680</b> |
| Phenol                                                                                | 12.146                             | 108-95-2    | 4.123         |
| Phenol, 2-methyl-                                                                     | 14.630                             | 95-48-7     | 0.539         |
| Benzenemethanol, $\alpha,\alpha$ -dimethyl-                                           | 15.904                             | 617-94-7    | 1.567         |
| Phenol, 2,5-dimethyl-                                                                 | 16.580                             | 95-87-4     | 0.414         |
| p-Cumenol                                                                             | 20.028                             | 99-89-8     | 7.365         |
| Phenol, 2-methyl-5-(1-methylethyl)-                                                   | 22.055                             | 499-75-2    | 0.287         |
| Phenol, 2-(1-phenylethyl)-                                                            | 33.240                             | 4237-44-9   | 0.542         |
| 2,3-Dimethyl-1,4,4a,9a-tetrahydroanthracene-9,10-dione                                | 37.226                             | 2670-23-7   | 0.334         |
| Benzaldehyde, 2-methyl-, (2,4-dinitrophenyl)hydrazone                                 | 50.785                             | 1773-44-0   | 0.509         |
| <b>Non identified fraction</b>                                                        | <b><math>\Sigma</math>(%.area)</b> |             | <b>2.092</b>  |

**Table S4:** Classes of compounds, summation of peak areas, CAS number, and retention times of chemical compounds identified by GC-MS in bio-oil by thermal cracking of WEEE plastic at 400 °C, 1.0 atm, Reaction time=15 min, in semi-pilot scale two-stage reactor of 2.0 L.

| Chemical Compound                                            | RT (min)                          | CAS        | wi(%Area)     |
|--------------------------------------------------------------|-----------------------------------|------------|---------------|
| <b>Aromatic Hydrocarbons</b>                                 | <b><math>\Sigma</math>(%area)</b> |            | <b>50.222</b> |
| Styrene                                                      | 9.728                             | 100-42-5   | 5.662         |
| Benzene, (1-methylethyl)-                                    | 10.710                            | 98-82-8    | 2.791         |
| $\alpha$ -Methylstyrene                                      | 12.584                            | 98-83-9    | 5.282         |
| Benzene, 1-propenyl-                                         | 14.092                            | 637-50-3   | 0.463         |
| Indene                                                       | 14.848                            | 95-13-6    | 0.253         |
| Biphenyl                                                     | 25.017                            | 92-52-4    | 0.313         |
| Diphenylmethane                                              | 26.329                            | 101-81-5   | 0.628         |
| Benzene, 1,1'-ethylenedibis-                                 | 27.764                            | 612-00-0   | 0.549         |
| Bibenzyl                                                     | 28.688                            | 103-29-7   | 0.509         |
| Benzene, 1,1'-(1,3-propanediyl)bis-                          | 32.085                            | 1081-75-0  | 13.692        |
| Benzene, 1,1'-(3-methyl-1-propene-1,3-diyl)bis-              | 32.412                            | 7614-93-9  | 1.432         |
| Benzene, 1,1'-(1-methyl-1,3-propanediyl)bis-                 | 32.600                            | 1520-44-1  | 1.887         |
| 1,2-Diphenylcyclopropane                                     | 33.636                            | 29881-14-9 | 2.648         |
| Benzene, 1,1'-(1,4-butanediyl)bis-                           | 34.021                            | 1083-56-3  | 0.567         |
| Benzene, 1,1'-(3-methyl-1-propene-1,3-diyl)bis-              | 34.386                            | 7614-93-9  | 0.899         |
| 2,4-Diphenyl-4-methyl-1-pentene                              | 34.748                            | -          | 0.526         |
| Benzene, 1,1'-(2-methyl-1-propenylenedibis)-                 | 34.898                            | 781-33-9   | 2.637         |
| 1-(4-Methylphenyl)-4-phenylbuta-1,3-diene                    | 36.410                            | 37985-11-8 | 0.426         |
| Benzene, 1,1'-[3-(2-phenylethylenedibis)-1,5-pentanediy]bis- | 43.693                            | 55334-57-1 | 0.712         |
| Naphthalene, 2-(phenylmethyl)-                               | 44.292                            | 613-59-2   | 2.046         |
| Benzene, 1,1'-[3-(2-phenylethylenedibis)-1,5-pentanediy]bis- | 44.682                            | 55334-57-1 | 1.967         |
| Benzene, (1-methylhexadecyl)-                                | 45.093                            | 55125-25-2 | 0.512         |
| p-Terphenyl                                                  | 45.430                            | 92-94-4    | 0.298         |
| 1-Propene, 3-(2-cyclopentenyl)-2-methyl-1,1-diphenyl-        | 49.302                            | -          | 0.968         |
| 1-Propene, 3-(2-cyclopentenyl)-2-methyl-1,1-diphenyl-        | 53.449                            | -          | 2.555         |
| <b>Polycyclic aromatic hydrocarbons (PAH)</b>                | <b><math>\Sigma</math>(%area)</b> |            | <b>7.515</b>  |
| Naphthalene                                                  | 19.491                            | 91-20-3    | 0.721         |
| Naphthalene, 1-methyl-                                       | 22.770                            | 90-12-0    | 0.403         |
| Naphthalene, 2-methyl-                                       | 23.259                            | 91-57-6    | 0.552         |
| Naphthalene, 1,2,3,4-tetrahydro-1-phenyl-                    | 34.473                            | 3018-20-0  | 0.625         |
| Naphthalene, 1,2,3,4-tetrahydro-6-(phenylmethyl)-            | 35.372                            | 35310-85-1 | 0.4           |
| Naphthalene, 1-phenyl-                                       | 36.578                            | 605-02-7   | 2.175         |
| Naphthalene, 2,7-bis(1,1-dimethylethyl)-                     | 37.221                            | 10275-58-8 | 0.577         |
| Naphthalene, 2-phenyl-                                       | 40.019                            | 612-94-2   | 2.062         |
| <b>Nitrogenated Compounds</b>                                | <b><math>\Sigma</math>(%area)</b> |            | <b>25.923</b> |
| Benzonitrile                                                 | 12.687                            | 100-47-0   | 0.134         |
| Benzyl nitrile                                               | 17.566                            | 140-29-4   | 0.375         |
| Benzeneacetoneitrile, $\alpha$ -methyl-                      | 18.434                            | 1823-91-2  | 0.658         |

|                                                                                       |                                    |             |               |
|---------------------------------------------------------------------------------------|------------------------------------|-------------|---------------|
| Benzenepropanenitrile                                                                 | 20.642                             | 645-59-0    | 0.298         |
| 1,2-Benzenedicarbonitrile                                                             | 21.230                             | 91-15-6     | 0.36          |
| Cyclopropanecarbonitrile, 2-phenyl-, trans-                                           | 22.408                             | 5590-14-7   | 0.339         |
| Benzenebutanenitrile                                                                  | 23.461                             | 2046-18-6   | 13.156        |
| quinoline, 1,2-dihydro-1-methyl-2-methylene-                                          | 24.133                             |             | 0.781         |
| 3-Benzyl-4,5-dihydro-3H-pyrrole                                                       | 24.347                             | -           | 1.739         |
| 1,2,3,3a-Tetrahydropentalene, 1,1-dimethyl-3-cyanomethylene-                          | 24.847                             | -           | 0.241         |
| Cyclopropanecarbonitrile, 2-phenyl-, trans-                                           | 25.772                             | 5590-14-7   | 0.283         |
| 1H-Pyrrole, 1-(4-methylphenyl)-                                                       | 26.122                             | 827-60-1    | 0.352         |
| Quinoline, 4-ethyl-                                                                   | 27.451                             | 19020-26-9  | 0.385         |
| Naphthalene, 1-isocyano-                                                              | 28.187                             | 09/04/1984  | 0.949         |
| Naphthalene, 1-isocyano-                                                              | 28.899                             | 09/04/1984  | 0.582         |
| 1-Naphthaleneacetonitrile                                                             | 32.306                             | 132-75-2    | 1.018         |
| N-(2-Phenylethyl)-cis-2,3-epoxynona-6,8-dynamide                                      | 34.586                             | 96917-25-8  | 0.489         |
| Octadecanenitrile                                                                     | 43.043                             | 638-65-3    | 0.805         |
| 4-Methyl-3-(O-methylbenzyl)pentanenitrile                                             | 43.877                             | 29107-40-2  | 0.737         |
| (1-Benzyl-2-O-tolyl-ethyl)-isonitrile                                                 | 44.445                             | -           | 0.84          |
| Naphthalene-1,3,3-tricarbonitrile, 3,4,4a,5,6,7-hexahydro-2-amino-4-(4-methylphenyl)- | 49.679                             | 163978-39-0 | 0.283         |
| Naphthalene-1,3,3-tricarbonitrile, 3,4,4a,5,6,7-hexahydro-2-amino-4-(4-methylphenyl)- | 50.378                             | 163978-39-0 | 0.445         |
| Acridine, 9-phenyl-                                                                   | 51.600                             | 602-56-2    | 0.674         |
| <b>Brominated Compounds</b>                                                           | <b><math>\Sigma</math>(%.area)</b> |             | <b>0.665</b>  |
| Phenol, 3-bromo-                                                                      | 15.590                             | 591-20-8    | 0.315         |
| 5-Bromo-2-methoxy-1,3-dimethylbenzene                                                 | 23.559                             | -           | 0.350         |
| <b>Oxygenated Compounds</b>                                                           | <b><math>\Sigma</math>(%.area)</b> |             | <b>12.889</b> |
| Phenol                                                                                | 12.146                             | 108-95-2    | 3.072         |
| Phenol, 2-methyl-                                                                     | 14.630                             | 95-48-7     | 0.7           |
| Benzenemethanol, $\alpha$ -methyl-                                                    | 15.081                             | 98-85-1     | 0.327         |
| Benzenemethanol, $\alpha,\alpha$ -dimethyl-                                           | 15.904                             | 617-94-7    | 1.556         |
| Phenol, 2,5-dimethyl-                                                                 | 16.580                             | 95-87-4     | 0.428         |
| p-Cumenol                                                                             | 20.028                             | 99-89-8     | 4.53          |
| Phenol, 2-methyl-5-(1-methylethyl)-                                                   | 22.055                             | 499-75-2    | 0.311         |
| Phenol, 2-(1-phenylethyl)-                                                            | 33.240                             | 4237-44-9   | 1.005         |
| Benzaldehyde, 2-methyl-, (2,4-dinitrophenyl)hydrazone                                 | 50.781                             | 1773-44-0   | 0.96          |
| <b>Non identified fraction</b>                                                        | <b><math>\Sigma</math>(%.area)</b> |             | <b>2.784</b>  |



**Table S5:** Classes of compounds, summation of peak areas, CAS number, and retention times of chemical compounds identified by GC-MS in bio-oil by thermal cracking of WEEE plastic at 400 °C, 1.0 atm, Reaction time=30 min, in semi-pilot scale two-stage reactor of 2.0 L.

| Chemical Compound                                          | RT (min)        | CAS        | wi(%Area)     |
|------------------------------------------------------------|-----------------|------------|---------------|
| <b>Aromatic Hydrocarbons</b>                               | <b>Σ(%area)</b> |            | <b>56.934</b> |
| Styrene                                                    | 9.728           | 100-42-5   | 11.056        |
| Benzene, (1-methylethyl)-                                  | 10.710          | 98-82-8    | 4.313         |
| Benzene, propyl-                                           | 11.687          | 103-65-1   | 0.261         |
| α-Methylstyrene                                            | 12.584          | 98-83-9    | 1.971         |
| Benzene, 1-propenyl-                                       | 14.092          | 637-50-3   | 0.521         |
| Biphenyl                                                   | 25.017          | 92-52-4    | 0.266         |
| Diphenylmethane                                            | 26.329          | 101-81-5   | 0.501         |
| Benzene, 1,1'-ethylenedibis-                               | 27.764          | 612-00-0   | 0.622         |
| Bibenzyl                                                   | 28.688          | 103-29-7   | 0.460         |
| Benzene, 1,1'-(1,2-dimethyl-1,2-ethanediyl)bis-            | 29.185          | 5789-35-5  | 2.208         |
| Benzene, 1,1'-(oxydiethylenedibis-                         | 30.059          | 93-96-9    | 0.357         |
| Benzene, 1,1'-(oxydiethylenedibis-                         | 30.496          | 93-96-9    | 0.407         |
| Benzene, 1,1'-(1,3-propanediyl)bis-                        | 32.085          | 1081-75-0  | 8.518         |
| Benzene, 1,1'-(3-methyl-1-propene-1,3-diyl)bis-            | 32.412          | 7614-93-9  | 1.052         |
| Benzene, 1,1'-(1-methyl-1,3-propanediyl)bis-               | 32.600          | 1520-44-1  | 1.177         |
| 1,2-Diphenylcyclopropane                                   | 33.636          | 29881-14-9 | 1.936         |
| Benzene, 1,1'-(1,4-butanediyl)bis-                         | 34.021          | 1083-56-3  | 0.357         |
| Benzene, 1,1'-(3-methyl-1-propene-1,3-diyl)bis-            | 34.386          | 7614-93-9  | 1.492         |
| 2,4-Diphenyl-4-methyl-1-pentene                            | 34.748          | -          | 5.481         |
| Benzene, 1,1'-(2-methyl-1-propenylenedibis-                | 34.898          | 781-33-9   | 3.873         |
| 2,4-Diphenyl-4-methyl-2(E)-pentene                         | 35.518          | 22768-22-5 | 3.868         |
| 1-(4-Methylphenyl)-4-phenylbuta-1,3-diene                  | 36.410          | 37985-11-8 | 0.701         |
| Benzene, 1,1'-[3-(2-phenylethylenedibis)-1,5-pentanedibis] | 43.693          | 55334-57-1 | 0.361         |
| Benzene, 1,1'-[3-(2-phenylethylenedibis)-1,5-pentanedibis] | 44.682          | 55334-57-1 | 0.756         |
| Benzene, 1,1'-(1,1,2,2-tetramethyl-1,2-ethanediyl)bis-     | 48.270          | -          | 1.291         |
| 1-Propene, 3-(2-cyclopentenyl)-2-methyl-1,1-diphenyl-      | 49.302          | -          | 0.271         |
| Benzene, 1,1'-(1,4-dimethyl-1-butene-1,4-diyl)bis-         | 51.646          | 52161-54-3 | 1.125         |
| Benzene, 1,1'-(1,4-dimethyl-1-butene-1,4-diyl)bis-         | 53.070          | 52161-54-3 | 0.545         |
| 1-Propene, 3-(2-cyclopentenyl)-2-methyl-1,1-diphenyl-      | 53.449          | -          | 1.187         |
| <b>Polycyclic aromatic hydrocarbons (PAH)</b>              | <b>Σ(%area)</b> |            | <b>10.205</b> |
| Naphthalene                                                | 19.491          | 91-20-3    | 0.629         |
| Naphthalene, 1-methyl-                                     | 22.770          | 90-12-0    | 0.240         |
| Naphthalene, 2-methyl-                                     | 23.259          | 91-57-6    | 0.509         |
| Naphthalene, 1,2,3,4-tetrahydro-1-phenyl-                  | 34.473          | 3018-20-0  | 0.448         |
| Naphthalene, 1,2,3,4-tetrahydro-6-(phenylmethyl)-          | 35.372          | 35310-85-1 | 2.504         |
| Naphthalene, 1-phenyl-                                     | 36.578          | 605-02-7   | 1.738         |
| Naphthalene, 2,7-bis(1,1-dimethylethyl)-                   | 37.221          | 10275-58-8 | 1.308         |
| Naphthalene, 2-phenyl-                                     | 40.019          | 612-94-2   | 1.536         |

|                                                                                      |                                    |             |               |
|--------------------------------------------------------------------------------------|------------------------------------|-------------|---------------|
| Naphthalene, 2-(phenylmethyl)-                                                       | 44.292                             | 613-59-2    | 1.293         |
| <b>Nitrogenated Compounds</b>                                                        | <b><math>\Sigma</math>(%.area)</b> |             | <b>18.264</b> |
| Benzonitrile                                                                         | 12.687                             | 100-47-0    | 0.061         |
| Benzyl nitrile                                                                       | 17.566                             | 140-29-4    | 0.284         |
| Benzeneacetonitrile, $\alpha$ -methyl-                                               | 18.434                             | 1823-91-2   | 0.426         |
| Benzenepropanenitrile                                                                | 20.642                             | 645-59-0    | 0.249         |
| 1,2-Benzenedicarbonitrile                                                            | 21.230                             | 91-15-6     | 0.337         |
| Cyclopropanecarbonitrile, 2-phenyl-, trans-                                          | 22.408                             | 5590-14-7   | 0.289         |
| Benzenebutanenitrile                                                                 | 23.461                             | 2046-18-6   | 9.615         |
| quinoline, 1,2-dihydro-1-methyl-2-methylene-                                         | 24.133                             | -           | 0.943         |
| 3-Benzyl-4,5-dihydro-3H-pyrrole                                                      | 24.347                             | -           | 1.147         |
| Cyclopropanecarbonitrile, 2-phenyl-, trans-                                          | 25.772                             | 5590-14-7   | 0.255         |
| 1H-Pyrrole, 1-(4-methylphenyl)-                                                      | 26.122                             | 827-60-1    | 0.288         |
| Quinoline, 4-ethyl-                                                                  | 27.451                             | 19020-26-9  | 0.330         |
| Naphthalene, 1-isocyano-                                                             | 28.187                             | 09/04/1984  | 0.839         |
| Naphthalene, 1-isocyano-                                                             | 28.899                             | 09/04/1984  | 0.444         |
| 1-Naphthaleneacetonitrile                                                            | 32.306                             | 132-75-2    | 0.759         |
| N-(2-Phenylethyl)-cis-2,3-epoxynona-6,8-diynamide                                    | 34.586                             | 96917-25-8  | 0.309         |
| Octadecanenitrile                                                                    | 43.043                             | 638-65-3    | 0.576         |
| 4-Methyl-3-(O-methylbenzyl)pentanenitrile                                            | 43.877                             | 29107-40-2  | 0.320         |
| (1-Benzyl-2-O-tolyl-ethyl)-isonitrile                                                | 44.445                             | -           | 0.331         |
| Naphthalene-1,3,3-tricarbonitrile, 3,4,4a,5,6,7-hexahdro-2-amino-4-(4-methylphenyl)- | 49.679                             | 163978-39-0 | 0.045         |
| 2-(4-Methoxy-2,6-dimethylphenyl)-3-methyl-2H-benzo[g]indazole                        | 52.208                             | -           | 0.417         |
| <b>Brominated Compounds</b>                                                          | <b><math>\Sigma</math>(%.area)</b> |             | <b>0.704</b>  |
| Phenol, 3-bromo-                                                                     | 15.590                             | 591-20-8    | 0.336         |
| 5-Bromo-2-methoxy-1,3-dimethylbenzene                                                | 23.559                             | -           | 0.368         |
| <b>Oxygenated Compounds</b>                                                          | <b><math>\Sigma</math>(%.area)</b> |             | <b>11.623</b> |
| Phenol                                                                               | 12.146                             | 108-95-2    | 2.312         |
| Phenol, 2-methyl-                                                                    | 14.630                             | 95-48-7     | 0.179         |
| Benzenemethanol, $\alpha$ -methyl-                                                   | 15.081                             | 98-85-1     | 0.707         |
| Benzenemethanol, $\alpha,\alpha$ -dimethyl-                                          | 15.904                             | 617-94-7    | 0.275         |
| Phenol, 2,5-dimethyl-                                                                | 16.580                             | 95-87-4     | 0.184         |
| p-Cumenol                                                                            | 20.028                             | 99-89-8     | 3.317         |
| Phenol, 2-methyl-5-(1-methylethyl)-                                                  | 22.055                             | 499-75-2    | 0.181         |
| Phenol, o-( $\alpha,\alpha$ -dimethylbenzyl)-                                        | 33.107                             | 18168-40-6  | 0.243         |
| Phenol, 2-(1-phenylethyl)-                                                           | 33.240                             | 4237-44-9   | 1.544         |
| Benzenemethanol, 2,4,6-trimethyl- $\alpha$ -phenyl-                                  | 36.000                             | 21945-75-5  | 0.275         |
| Phenol, 4-(1-methyl-1-phenylethyl)-                                                  | 36.122                             | 599-64-4    | 1.027         |
| 2-tert-Butyl-6-( $\alpha$ -methylbenzyl)phenol                                       | 37.124                             | 17959-02-3  | 0.418         |
| Benzaldehyde, 2-methyl-, (2,4-dinitrophenyl)hydrazone                                | 50.781                             | 1773-44-0   | 0.419         |
| $\alpha$ -N-Normethadol                                                              | 54.073                             | 38455-85-5  | 0.542         |
| <b>Non identified fraction</b>                                                       | <b><math>\Sigma</math>(%.area)</b> |             | <b>2.267</b>  |

**Table S6:** Classes of compounds, summation of peak areas, CAS number, and retention times of chemical compounds identified by GC-MS in bio-oil by thermal cracking of WEEE plastic at 400 °C, 1.0 atm, Reaction time=45 min, in semi-pilot scale two-stage reactor of 2.0 L.

| Chemical Compound                                         | RT (min)                          | CAS         | wi(%Area)     |
|-----------------------------------------------------------|-----------------------------------|-------------|---------------|
| <b>Aromatic Hydrocarbons</b>                              | <b><math>\Sigma</math>(%area)</b> |             | <b>45.964</b> |
| Styrene                                                   | 9.728                             | 100-42-5    | 5.664         |
| Benzene, (1-methylethyl)-                                 | 10.710                            | 98-82-8     | 2.864         |
| Benzene, propyl-                                          | 11.687                            | 103-65-1    | 0.178         |
| $\alpha$ -Methylstyrene                                   | 12.584                            | 98-83-9     | 5.220         |
| Benzene, 1-propenyl-                                      | 14.092                            | 637-50-3    | 0.516         |
| Biphenyl                                                  | 25.017                            | 92-52-4     | 0.379         |
| Diphenylmethane                                           | 26.329                            | 101-81-5    | 0.720         |
| Benzene, 1,1'-ethylidenebis-                              | 27.764                            | 612-00-0    | 0.417         |
| Bibenzyl                                                  | 28.688                            | 103-29-7    | 0.684         |
| Benzene, 1,1'-(1,2-dimethyl-1,2-ethanediyl)bis-           | 29.185                            | 5789-35-5   | 0.551         |
| Benzene, 1,1'-(1,3-propanediyl)bis-                       | 32.085                            | 1081-75-0   | 11.875        |
| Benzene, 1,1'-(3-methyl-1-propene-1,3-diyl)bis-           | 32.412                            | 7614-93-9   | 1.617         |
| Benzene, 1,1'-(1-methyl-1,3-propanediyl)bis-              | 32.600                            | 1520-44-1   | 1.650         |
| 1,2-Diphenylcyclopropane                                  | 33.636                            | 29881-14-9  | 2.968         |
| Benzene, 1,1'-(1,4-butanediyl)bis-                        | 34.021                            | 1083-56-3   | 0.492         |
| Benzene, 1,1'-(3-methyl-1-propene-1,3-diyl)bis-           | 34.386                            | 7614-93-9   | 1.187         |
| 2,4-Diphenyl-4-methyl-1-pentene                           | 34.748                            | -           | 2.256         |
| Benzene, 1,1'-(2-methyl-1-propenylidene)bis-              | 34.898                            | 781-33-9    | 2.726         |
| 2,4-Diphenyl-4-methyl-2(E)-pentene                        | 35.518                            | 22768-22-5  | 0.427         |
| 1-(4-Methylphenyl)-4-phenylbuta-1,3-diene                 | 36.410                            | 37985-11-8  | 0.424         |
| 9-Phenyl-5H-benzocycloheptene                             | 40.386                            | 138089-71-1 | 0.541         |
| Benzene, 1,1'-[3-(2-phenylethylidene)-1,5-pentanediy]bis- | 44.682                            | 55334-57-1  | 1.003         |
| 1-Propene, 3-(2-cyclopentenyl)-2-methyl-1,1-diphenyl-     | 49.302                            | -           | 0.378         |
| Benzene, 1,1'-(1,4-dimethyl-1-butene-1,4-diyl)bis-        | 51.646                            | 52161-54-3  | 0.374         |
| 1-Propene, 3-(2-cyclopentenyl)-2-methyl-1,1-diphenyl-     | 53.449                            | -           | 0.853         |
| <b>Polycyclic aromatic hydrocarbons (PAH)</b>             | <b><math>\Sigma</math>(%area)</b> |             | <b>11.092</b> |
| Naphthalene                                               | 19.491                            | 91-20-3     | 0.843         |
| Naphthalene, 1-methyl-                                    | 22.770                            | 90-12-0     | 0.373         |
| Naphthalene, 2-methyl-                                    | 23.259                            | 91-57-6     | 0.794         |
| Naphthalene, 1,2,3,4-tetrahydro-1-phenyl-                 | 34.473                            | 3018-20-0   | 0.696         |
| Naphthalene, 1,2,3,4-tetrahydro-6-(phenylmethyl)-         | 35.372                            | 35310-85-1  | 0.571         |
| Naphthalene, 1-phenyl-                                    | 36.578                            | 605-02-7    | 2.459         |
| Naphthalene, 2,7-bis(1,1-dimethylethyl)-                  | 37.221                            | 10275-58-8  | 0.557         |
| 9,10-Dimethylantracene                                    | 37.560                            | 781-43-1    | 0.307         |
| Naphthalene, 2-phenyl-                                    | 40.019                            | 612-94-2    | 2.601         |
| Naphthalene, 2-(phenylmethyl)-                            | 44.292                            | 613-59-2    | 1.891         |
| <b>Nitrogenated Compounds</b>                             | <b><math>\Sigma</math>(%area)</b> |             | <b>27.880</b> |
| Benzonitrile                                              | 12.687                            | 100-47-0    | 0.068         |

|                                                                 |                                    |            |               |
|-----------------------------------------------------------------|------------------------------------|------------|---------------|
| Benzyl nitrile                                                  | 17.566                             | 140-29-4   | 0.445         |
| Benzeneacetonitrile, $\alpha$ -methyl-                          | 18.434                             | 1823-91-2  | 0.692         |
| Benzenepropanenitrile                                           | 20.642                             | 645-59-0   | 0.337         |
| 1,2-Benzenedicarbonitrile                                       | 21.230                             | 91-15-6    | 0.580         |
| Cyclopropanecarbonitrile, 2-phenyl-, trans-                     | 22.408                             | 5590-14-7  | 0.476         |
| Benzenebutanenitrile                                            | 23.461                             | 2046-18-6  | 14.634        |
| Cyclopropanecarbonitrile, 2-phenyl-, trans-                     | 23.924                             | 5590-14-7  | 0.272         |
| quinoline, 1,2-dihydro-1-methyl-2-methylene-                    | 24.133                             |            | 1.060         |
| 3-Benzyl-4,5-dihydro-3H-pyrrole                                 | 24.347                             | -          | 1.802         |
| 1,2,3,3a-Tetrahydropentalene, 1,1-dimethyl-3-cyanomethylene-    | 24.851                             | -          | 0.229         |
| Cyclopropanecarbonitrile, 2-phenyl-, trans-                     | 25.772                             | 5590-14-7  | 0.435         |
| 1H-Pyrrole, 1-(4-methylphenyl)-                                 | 26.122                             | 827-60-1   | 0.475         |
| (7-Isopropylidenebicyclo[2.2.1]hept-5-en-2-ylidene)acetonitrile | 26.704                             | -          | 0.315         |
| Quinoline, 4-ethyl-                                             | 27.451                             | 19020-26-9 | 0.536         |
| Naphthalene, 1-isocyano-                                        | 28.187                             | 09/04/1984 | 1.416         |
| Naphthalene, 1-isocyano-                                        | 28.899                             | 09/04/1984 | 0.729         |
| 1-Naphthaleneacetonitrile                                       | 32.306                             | 132-75-2   | 1.206         |
| N-(2-Phenylethyl)-cis-2,3-epoxynona-6,8-diynamide               | 34.586                             | 96917-25-8 | 0.440         |
| Octadecanenitrile                                               | 43.043                             | 638-65-3   | 0.751         |
| 4-Methyl-3-(O-methylbenzyl)pentanenitrile                       | 43.877                             | 29107-40-2 | 0.484         |
| (1-Benzyl-2-O-tolyl-ethyl)-isonitrile                           | 44.445                             | -          | 0.498         |
| <b>Brominated Compounds</b>                                     | <b><math>\Sigma</math>(%.area)</b> |            | <b>0.510</b>  |
| Phenol, 3-bromo-                                                | 15.590                             | 591-20-8   | 0.210         |
| 5-Bromo-2-methoxy-1,3-dimethylbenzene                           | 23.559                             | -          | 0.300         |
| <b>Oxygenated Compounds</b>                                     | <b><math>\Sigma</math>(%.area)</b> |            | <b>13.082</b> |
| Phenol                                                          | 12.146                             | 108-95-2   | 3.227         |
| Phenol, 2-methyl-                                               | 14.630                             | 95-48-7    | 0.507         |
| Benzenemethanol, $\alpha$ -methyl-                              | 15.081                             | 98-85-1    | 0.343         |
| Benzenemethanol, $\alpha,\alpha$ -dimethyl-                     | 15.904                             | 617-94-7   | 1.249         |
| Phenol, 2,5-dimethyl-                                           | 16.580                             | 95-87-4    | 0.312         |
| p-Cumenol                                                       | 20.028                             | 99-89-8    | 5.494         |
| Phenol, 2-methyl-5-(1-methylethyl)-                             | 22.055                             | 499-75-2   | 0.318         |
| Phenol, 2-(1-phenylethyl)-                                      | 33.240                             | 4237-44-9  | 1.280         |
| Benzaldehyde, 2-methyl-, (2,4-dinitrophenyl)hydrazone           | 50.781                             | 1773-44-0  | 0.352         |
| <b>Non identified fraction</b>                                  | <b><math>\Sigma</math>(%.area)</b> |            | <b>1.473</b>  |

**Table S7:** Classes of compounds, summation of peak areas, CAS number, and retention times of chemical compounds identified by GC-MS in bio-oil by thermal cracking of WEEE plastic at 400 °C, 1.0 atm, Reaction time=60 min, in semi-pilot scale two-stage reactor of 2.0 L.

| Chemical Compound                                         | RT (min)                          | CAS         | wi(%Area)     |
|-----------------------------------------------------------|-----------------------------------|-------------|---------------|
| <b>Aromatic Hydrocarbons</b>                              | <b><math>\Sigma</math>(%area)</b> |             | <b>46.105</b> |
| Styrene                                                   | 9.728                             | 100-42-5    | 3.944         |
| Benzene, (1-methylethyl)-                                 | 10.710                            | 98-82-8     | 2.178         |
| $\alpha$ -Methylstyrene                                   | 12.584                            | 98-83-9     | 3.877         |
| Benzene, 1-propenyl-                                      | 14.092                            | 637-50-3    | 0.329         |
| Biphenyl                                                  | 25.017                            | 92-52-4     | 0.300         |
| Diphenylmethane                                           | 26.329                            | 101-81-5    | 0.744         |
| Benzene, 1,1'-ethylidenebis-                              | 27.764                            | 612-00-0    | 0.795         |
| Bibenzyl                                                  | 28.688                            | 103-29-7    | 0.672         |
| Benzene, 1,1'-(1,3-propanediyl)bis-                       | 32.085                            | 1081-75-0   | 15.312        |
| Benzene, 1,1'-(3-methyl-1-propene-1,3-diyl)bis-           | 32.412                            | 7614-93-9   | 1.780         |
| Benzene, 1,1'-(1-methyl-1,3-propanediyl)bis-              | 32.600                            | 1520-44-1   | 2.131         |
| 1,2-Diphenylcyclopropane                                  | 33.636                            | 29881-14-9  | 3.290         |
| Benzene, 1,1'-(1,4-butanediyl)bis-                        | 34.021                            | 1083-56-3   | 0.669         |
| Benzene, 1,1'-(3-methyl-1-propene-1,3-diyl)bis-           | 34.386                            | 7614-93-9   | 1.189         |
| 2,4-Diphenyl-4-methyl-1-pentene                           | 34.748                            | -           | 0.445         |
| Benzene, 1,1'-(2-methyl-1-propenylidene)bis-              | 34.898                            | 781-33-9    | 2.585         |
| 1-(4-Methylphenyl)-4-phenylbuta-1,3-diene                 | 36.410                            | 37985-11-8  | 0.508         |
| 1H-Indene, 2-phenyl-                                      | 36.864                            | 4505-48-0   | 0.107         |
| 9-Phenyl-5H-benzocycloheptene                             | 40.386                            | 138089-71-1 | 0.530         |
| Benzene, 1,1'-[3-(2-phenylethylidene)-1,5-pentanediy]bis- | 44.682                            | 55334-57-1  | 1.538         |
| Benzene, (1-methylhexadecyl)-                             | 45.088                            | 55125-25-2  | 0.478         |
| p-Terphenyl                                               | 45.432                            | 92-94-4     | 0.255         |
| 1-Propene, 3-(2-cyclopentenyl)-2-methyl-1,1-diphenyl-     | 49.302                            | -           | 0.473         |
| Benzene, 1,1'-(1,4-dimethyl-1-butene-1,4-diyl)bis-        | 51.646                            | 52161-54-3  | 0.398         |
| 1-Propene, 3-(2-cyclopentenyl)-2-methyl-1,1-diphenyl-     | 53.449                            | -           | 0.861         |
| 1,1':3',1''-Terphenyl, 5'-phenyl-                         | 68.111                            | 612-71-5    | 0.717         |
| <b>Polycyclic aromatic hydrocarbons (PAH)</b>             | <b><math>\Sigma</math>(%area)</b> |             | <b>10.007</b> |
| Naphthalene                                               | 19.491                            | 91-20-3     | 0.551         |
| Naphthalene, 1-methyl-                                    | 22.770                            | 90-12-0     | 0.301         |
| Naphthalene, 2-methyl-                                    | 23.259                            | 91-57-6     | 0.597         |
| Naphthalene, 1,2,3,4-tetrahydro-1-phenyl-                 | 34.473                            | 3018-20-0   | 0.720         |
| Naphthalene, 1,2,3,4-tetrahydro-6-(phenylmethyl)-         | 35.372                            | 35310-85-1  | 0.406         |
| Naphthalene, 1-phenyl-                                    | 36.578                            | 605-02-7    | 2.337         |
| Naphthalene, 2,7-bis(1,1-dimethylethyl)-                  | 37.221                            | 10275-58-8  | 0.440         |
| 9,10-Dimethylanthracene                                   | 37.560                            | 781-43-1    | 0.307         |
| Naphthalene, 2-phenyl-                                    | 40.019                            | 612-94-2    | 2.470         |
| Naphthalene, 2-(phenylmethyl)-                            | 44.292                            | 613-59-2    | 1.878         |
| <b>Nitrogenated Compounds</b>                             | <b><math>\Sigma</math>(%area)</b> |             | <b>31.768</b> |

|                                                                                      |                                    |             |               |
|--------------------------------------------------------------------------------------|------------------------------------|-------------|---------------|
| Pentanedinitrile, 2-methyl-                                                          | 15.255                             | 4553-62-2   | 0.238         |
| Benzyl nitrile                                                                       | 17.566                             | 140-29-4    | 0.400         |
| Benzeneacetonitrile, $\alpha$ -methyl-                                               | 18.434                             | 1823-91-2   | 0.678         |
| Benzenepropanenitrile                                                                | 20.642                             | 645-59-0    | 0.342         |
| 1,2-Benzenedicarbonitrile                                                            | 21.230                             | 91-15-6     | 0.490         |
| Cyclopropanecarbonitrile, 2-phenyl-, trans-                                          | 22.408                             | 5590-14-7   | 0.474         |
| Benzenebutanenitrile                                                                 | 23.461                             | 2046-18-6   | 16.916        |
| Cyclopropanecarbonitrile, 2-phenyl-, trans-                                          | 23.924                             | 5590-14-7   | 0.303         |
| quinoline, 1,2-dihydro-1-methyl-2-methylene-                                         | 24.133                             |             | 1.113         |
| 3-Benzyl-4,5-dihydro-3H-pyrrole                                                      | 24.347                             | -           | 2.426         |
| 1,2,3,3a-Tetrahydropentalene, 1,1-dimethyl-3-cyanomethylene-                         | 24.851                             | -           | 0.299         |
| Cyclopropanecarbonitrile, 2-phenyl-, trans-                                          | 25.772                             | 5590-14-7   | 0.462         |
| 1H-Pyrrole, 1-(4-methylphenyl)-                                                      | 26.122                             | 827-60-1    | 0.512         |
| (7-Isopropylidenebicyclo[2.2.1]hept-5-en-2-ylidene)acetonitrile                      | 26.704                             | -           | 0.374         |
| Quinoline, 4-ethyl-                                                                  | 27.451                             | 19020-26-9  | 0.476         |
| Naphthalene, 1-isocyano-                                                             | 28.187                             | 09/04/1984  | 1.339         |
| Naphthalene, 1-isocyano-                                                             | 28.899                             | 09/04/1984  | 0.708         |
| 1-Naphthaleneacetonitrile                                                            | 32.306                             | 132-75-2    | 1.291         |
| N-(2-Phenylethyl)-cis-2,3-epoxynona-6,8-diynamide                                    | 34.586                             | 96917-25-8  | 0.504         |
| Octadecanenitrile                                                                    | 43.043                             | 638-65-3    | 0.645         |
| 4-Methyl-3-(O-methylbenzyl)pentanenitrile                                            | 43.877                             | 29107-40-2  | 0.667         |
| (1-Benzyl-2-O-tolyl-ethyl)-isonitrile                                                | 44.445                             | -           | 0.656         |
| Naphthalene-1,3,3-tricarbonitrile, 3,4,4a,5,6,7-hexahdro-2-amino-4-(4-methylphenyl)- | 49.680                             | 163978-39-0 | 0.232         |
| Naphthalene-1,3,3-tricarbonitrile, 3,4,4a,5,6,7-hexahdro-2-amino-4-(4-methylphenyl)- | 50.370                             | 163978-39-0 | 0.223         |
| <b>Brominated Compounds</b>                                                          | <b><math>\Sigma</math>(%.area)</b> |             | <b>0.223</b>  |
| 5-Bromo-2-methoxy-1,3-dimethylbenzene                                                | 23.559                             | -           | 0.223         |
| <b>Oxygenated Compounds</b>                                                          | <b><math>\Sigma</math>(%.area)</b> |             | <b>10.515</b> |
| Phenol                                                                               | 12.146                             | 108-95-2    | 2.369         |
| Phenol, 2-methyl-                                                                    | 14.630                             | 95-48-7     | 0.332         |
| Benzenemethanol, $\alpha,\alpha$ -dimethyl-                                          | 15.904                             | 617-94-7    | 1.267         |
| Phenol, 2,5-dimethyl-                                                                | 16.580                             | 95-87-4     | 0.277         |
| p-Cumenol                                                                            | 20.028                             | 99-89-8     | 4.541         |
| Phenol, 2-methyl-5-(1-methylethyl)-                                                  | 22.055                             | 499-75-2    | 0.275         |
| Phenol, 2-(1-phenylethyl)-                                                           | 33.240                             | 4237-44-9   | 0.962         |
| Benzaldehyde, 2-methyl-, (2,4-dinitrophenyl)hydrazone                                | 50.781                             | 1773-44-0   | 0.492         |
| <b>Non identified fraction</b>                                                       | <b><math>\Sigma</math>(%.area)</b> |             | <b>1.381</b>  |

**Table S8:** Classes of compounds, summation of peak areas, CAS number, and retention times of chemical compounds identified by GC-MS in bio-oil by thermal cracking of WEEE plastic at 450 °C, 1.0 atm, Reaction time=15 min, in semi-pilot scale two-stage reactor of 2.0 L.

| Chemical Compound                                         | RT (min)        | CAS        | wi(%Area)     |
|-----------------------------------------------------------|-----------------|------------|---------------|
| <b>Aromatic Hydrocarbons</b>                              | <b>Σ(%area)</b> |            | <b>47.525</b> |
| Styrene                                                   | 9.728           | 100-42-5   | 4.957         |
| Benzene, (1-methylethyl)-                                 | 10.710          | 98-82-8    | 3.168         |
| α-Methylstyrene                                           | 12.584          | 98-83-9    | 4.604         |
| Benzene, 1-propenyl-                                      | 14.092          | 637-50-3   | 0.355         |
| Diphenylmethane                                           | 26.329          | 101-81-5   | 0.469         |
| Benzene, 1,1'-ethylidenebis-                              | 27.764          | 612-00-0   | 0.518         |
| Bibenzyl                                                  | 28.688          | 103-29-7   | 0.515         |
| Benzene, 1,1'-(1,3-propanediyl)bis-                       | 32.085          | 1081-75-0  | 16.443        |
| Benzene, 1,1'-(3-methyl-1-propene-1,3-diyl)bis-           | 32.412          | 7614-93-9  | 1.549         |
| Benzene, 1,1'-(1-methyl-1,3-propanediyl)bis-              | 32.600          | 1520-44-1  | 2.422         |
| 1,2-Diphenylcyclopropane                                  | 33.636          | 29881-14-9 | 2.460         |
| Benzene, 1,1'-(1,4-butanediyl)bis-                        | 34.021          | 1083-56-3  | 0.820         |
| Benzene, 1,1'-(3-methyl-1-propene-1,3-diyl)bis-           | 34.386          | 7614-93-9  | 0.917         |
| 2,4-Diphenyl-4-methyl-1-pentene                           | 34.748          | -          | 1.006         |
| Benzene, 1,1'-(2-methyl-1-propenylidene)bis-              | 34.898          | 781-33-9   | 2.061         |
| 1-(4-Methylphenyl)-4-phenylbuta-1,3-diene                 | 36.410          | 37985-11-8 | 0.554         |
| Benzene, 1,1'-[3-(2-phenylethylidene)-1,5-pentanediy]bis- | 44.682          | 55334-57-1 | 1.656         |
| Benzene, (1-methylhexadecyl)-                             | 45.088          | 55125-25-2 | 0.463         |
| 1-Propene, 3-(2-cyclopentenyl)-2-methyl-1,1-diphenyl-     | 49.302          | -          | 0.607         |
| Benzene, 1,1'-(1,4-dimethyl-1-butene-1,4-diyl)bis-        | 51.646          | 52161-54-3 | 0.392         |
| 1-Propene, 3-(2-cyclopentenyl)-2-methyl-1,1-diphenyl-     | 53.449          | -          | 1.589         |
| <b>Polycyclic aromatic hydrocarbons (PAH)</b>             | <b>Σ(%area)</b> |            | <b>7.768</b>  |
| Naphthalene                                               | 19.491          | 91-20-3    | 0.385         |
| Naphthalene, 1-methyl-                                    | 22.770          | 90-12-0    | 0.237         |
| Naphthalene, 2-methyl-                                    | 23.259          | 91-57-6    | 0.441         |
| Naphthalene, 1,2,3,4-tetrahydro-1-phenyl-                 | 34.473          | 3018-20-0  | 0.617         |
| Naphthalene, 1,2,3,4-tetrahydro-6-(phenylmethyl)-         | 35.372          | 35310-85-1 | 0.361         |
| Naphthalene, 1-phenyl-                                    | 36.578          | 605-02-7   | 2.360         |
| Naphthalene, 2,7-bis(1,1-dimethylethyl)-                  | 37.221          | 10275-58-8 | 0.340         |
| Naphthalene, 2-phenyl-                                    | 40.019          | 612-94-2   | 1.493         |
| Naphthalene, 2-(phenylmethyl)-                            | 44.292          | 613-59-2   | 1.534         |
| <b>Nitrogenated Compounds</b>                             | <b>Σ(%area)</b> |            | <b>26.578</b> |
| Benzyl nitrile                                            | 17.566          | 140-29-4   | 0.276         |
| Benzeneacetonitrile, α-methyl-                            | 18.434          | 1823-91-2  | 0.586         |
| Benzenepropanenitrile                                     | 20.642          | 645-59-0   | 0.285         |
| 1,2-Benzenedicarbonitrile                                 | 21.230          | 91-15-6    | 0.588         |
| Cyclopropanecarbonitrile, 2-phenyl-, trans-               | 22.408          | 5590-14-7  | 0.277         |
| Benzenebutanenitrile                                      | 23.461          | 2046-18-6  | 13.943        |

|                                                                                       |                 |             |               |
|---------------------------------------------------------------------------------------|-----------------|-------------|---------------|
| quinoline, 1,2-dihydro-1-methyl-2-methylene-                                          | 24.133          |             | 0.833         |
| 3-Benzyl-4,5-dihydro-3H-pyrrole                                                       | 24.347          | -           | 2.166         |
| 1,2,3,3a-Tetrahydropentalene, 1,1-dimethyl-3-cyanomethylene-                          | 24.851          | -           | 0.314         |
| Cyclopropanecarbonitrile, 2-phenyl-, trans-                                           | 25.772          | 5590-14-7   | 0.261         |
| 1H-Pyrrole, 1-(4-methylphenyl)-                                                       | 26.122          | 827-60-1    | 0.352         |
| (7-Isopropylidenebicyclo[2.2.1]hept-5-en-2-ylidene)acetonitrile                       | 26.704          | -           | 0.289         |
| Quinoline, 4-ethyl-                                                                   | 27.451          | 19020-26-9  | 0.542         |
| Naphthalene, 1-isocyano-                                                              | 28.187          | 09/04/1984  | 1.085         |
| Naphthalene, 1-isocyano-                                                              | 28.899          | 09/04/1984  | 0.474         |
| 1-Naphthaleneacetonitrile                                                             | 32.306          | 132-75-2    | 0.899         |
| N-(2-Phenylethyl)-cis-2,3-epoxynona-6,8-diynamide                                     | 34.586          | 96917-25-8  | 0.410         |
| Octadecanenitrile                                                                     | 43.043          | 638-65-3    | 0.918         |
| 4-Methyl-3-(O-methylbenzyl)pentanenitrile                                             | 43.877          | 29107-40-2  | 0.724         |
| (1-Benzyl-2-O-tolyl-ethyl)-isonitrile                                                 | 44.445          | -           | 0.635         |
| Naphthalene-1,3,3-tricarbonitrile, 3,4,4a,5,6,7-hexahydro-2-amino-4-(4-methylphenyl)- | 49.680          | 163978-39-0 | 0.337         |
| Naphthalene-1,3,3-tricarbonitrile, 3,4,4a,5,6,7-hexahydro-2-amino-4-(4-methylphenyl)- | 50.370          | 163978-39-0 | 0.384         |
| <b>Brominated Compounds</b>                                                           | <b>Σ(%area)</b> |             | <b>0.662</b>  |
| Phenol, 2-bromo-                                                                      | 15.591          | 95-56-7     | 0.319         |
| 5-Bromo-2-methoxy-1,3-dimethylbenzene                                                 | 23.559          | -           | 0.343         |
| <b>Oxygenated Compounds</b>                                                           | <b>Σ(%area)</b> |             | <b>15.965</b> |
| Phenol                                                                                | 12.146          | 108-95-2    | 4.201         |
| Phenol, 2-methyl-                                                                     | 14.630          | 95-48-7     | 0.468         |
| Benzenemethanol, α-methyl-, (R)-                                                      | 15.082          | 4553-62-2   | 0.385         |
| Benzenemethanol, α,α-dimethyl-                                                        | 15.904          | 617-94-7    | 1.260         |
| Phenol, 2,5-dimethyl-                                                                 | 16.580          | 95-87-4     | 0.316         |
| p-Cumenol                                                                             | 20.028          | 99-89-8     | 7.066         |
| Phenol, 2-methyl-5-(1-methylethyl)-                                                   | 22.055          | 499-75-2    | 0.358         |
| Phenol, 2-(1-phenylethyl)-                                                            | 33.240          | 4237-44-9   | 0.988         |
| Phenol, 4-(1-methyl-1-phenylethyl)-                                                   | 36.125          | 599-64-4    | 0.297         |
| Benzaldehyde, 2-methyl-, (2,4-dinitrophenyl)hydrazone                                 | 50.781          | 1773-44-0   | 0.626         |
| <b>Non identified fraction</b>                                                        | <b>Σ(%area)</b> |             | <b>1.503</b>  |



**Table S9:** Classes of compounds, summation of peak areas, CAS number, and retention times of chemical compounds identified by GC-MS in bio-oil by thermal cracking of WEEE plastic at 450 °C, 1.0 atm, Reaction time=30 min, in semi-pilot scale two-stage reactor of 2.0 L.

| Chemical Compound                                         | RT (min)                          | CAS        | wi(%Area)     |
|-----------------------------------------------------------|-----------------------------------|------------|---------------|
| <b>Aromatic Hydrocarbons</b>                              | <b><math>\Sigma</math>(%area)</b> |            | <b>47.731</b> |
| Styrene                                                   | 9.728                             | 100-42-5   | 6.633         |
| Benzene, (1-methylethyl)-                                 | 10.710                            | 98-82-8    | 4.235         |
| $\alpha$ -Methylstyrene                                   | 12.584                            | 98-83-9    | 5.511         |
| Benzene, 1-propenyl-                                      | 14.092                            | 637-50-3   | 0.443         |
| Indene                                                    | 14.849                            | 95-13-6    | 0.276         |
| Diphenylmethane                                           | 26.329                            | 101-81-5   | 0.526         |
| Benzene, 1,1'-ethylidenebis-                              | 27.764                            | 612-00-0   | 0.551         |
| Bibenzyl                                                  | 28.688                            | 103-29-7   | 0.510         |
| Benzene, 1,1'-(1,3-propanediyl)bis-                       | 32.085                            | 1081-75-0  | 16.014        |
| Benzene, 1,1'-(3-methyl-1-propene-1,3-diyl)bis-           | 32.412                            | 7614-93-9  | 1.359         |
| Benzene, 1,1'-(1-methyl-1,3-propanediyl)bis-              | 32.600                            | 1520-44-1  | 2.554         |
| 1,2-Diphenylcyclopropane                                  | 33.636                            | 29881-14-9 | 2.182         |
| Benzene, 1,1'-(1,4-butanediyl)bis-                        | 34.021                            | 1083-56-3  | 0.636         |
| Benzene, 1,1'-(3-methyl-1-propene-1,3-diyl)bis-           | 34.386                            | 7614-93-9  | 0.672         |
| 2,4-Diphenyl-4-methyl-1-pentene                           | 34.748                            | -          | 0.633         |
| Benzene, 1,1'-(2-methyl-1-propenyldiene)bis-              | 34.898                            | 781-33-9   | 1.455         |
| 1-(4-Methylphenyl)-4-phenylbuta-1,3-diene                 | 36.410                            | 37985-11-8 | 0.521         |
| Benzene, 1,1'-[3-(2-phenylethylidene)-1,5-pentanediy]bis- | 44.682                            | 55334-57-1 | 1.329         |
| Benzene, (1-methylhexadecyl)-                             | 45.088                            | 55125-25-2 | 0.431         |
| 1-Propene, 3-(2-cyclopentenyl)-2-methyl-1,1-diphenyl-     | 49.302                            | -          | 0.288         |
| Benzene, 1,1'-(1,4-dimethyl-1-butene-1,4-diyl)bis-        | 51.646                            | 52161-54-3 | 0.335         |
| 1-Propene, 3-(2-cyclopentenyl)-2-methyl-1,1-diphenyl-     | 53.449                            | -          | 0.637         |
| <b>Polycyclic aromatic hydrocarbons (PAH)</b>             | <b><math>\Sigma</math>(%area)</b> |            | <b>9.732</b>  |
| Naphthalene                                               | 19.491                            | 91-20-3    | 0.562         |
| Naphthalene, 1-methyl-                                    | 22.770                            | 90-12-0    | 0.358         |
| Naphthalene, 2-methyl-                                    | 23.259                            | 91-57-6    | 0.528         |
| Naphthalene, 1-isocyano-                                  | 28.187                            | 09/04/1984 | 1.327         |
| Naphthalene, 1,2,3,4-tetrahydro-1-phenyl-                 | 34.473                            | 3018-20-0  | 0.641         |
| Naphthalene, 1,2,3,4-tetrahydro-6-(phenylmethyl)-         | 35.372                            | 35310-85-1 | 0.307         |
| Naphthalene, 1-phenyl-                                    | 36.578                            | 605-02-7   | 2.500         |
| Naphthalene, 2,7-bis(1,1-dimethylethyl)-                  | 37.221                            | 10275-58-8 | 0.309         |
| Naphthalene, 2-phenyl-                                    | 40.019                            | 612-94-2   | 1.687         |
| Naphthalene, 2-(phenylmethyl)-                            | 44.292                            | 613-59-2   | 1.513         |
| <b>Nitrogenated Compounds</b>                             | <b><math>\Sigma</math>(%area)</b> |            | <b>24.787</b> |
| Benzyl nitrile                                            | 17.566                            | 140-29-4   | 0.316         |
| Benzeneacetonitrile, $\alpha$ -methyl-                    | 18.434                            | 1823-91-2  | 0.649         |
| Benzenepropanenitrile                                     | 20.642                            | 645-59-0   | 0.315         |
| 1,2-Benzenedicarbonitrile                                 | 21.230                            | 91-15-6    | 0.751         |

|                                                                                       |                                    |             |               |
|---------------------------------------------------------------------------------------|------------------------------------|-------------|---------------|
| Cyclopropanecarbonitrile, 2-phenyl-, trans-                                           | 22.408                             | 5590-14-7   | 0.310         |
| Benzenebutanenitrile                                                                  | 23.461                             | 2046-18-6   | 13.720        |
| quinoline, 1,2-dihydro-1-methyl-2-methylene-                                          | 24.133                             |             | 0.916         |
| 3-Benzyl-4,5-dihydro-3H-pyrrole                                                       | 24.347                             | -           | 2.389         |
| 1,2,3,3a-Tetrahydropentalene, 1,1-dimethyl-3-cyanomethylene-                          | 24.851                             | -           | 0.276         |
| Cyclopropanecarbonitrile, 2-phenyl-, trans-                                           | 25.772                             | 5590-14-7   | 0.281         |
| 1H-Pyrrole, 1-(4-methylphenyl)-                                                       | 26.122                             | 827-60-1    | 0.352         |
| Quinoline, 4-ethyl-                                                                   | 27.451                             | 19020-26-9  | 0.467         |
| Naphthalene, 1-isocyano-                                                              | 28.899                             | 09/04/1984  | 0.538         |
| 1-Naphthaleneacetonitrile                                                             | 32.306                             | 132-75-2    | 0.924         |
| Octadecanenitrile                                                                     | 43.043                             | 638-65-3    | 0.788         |
| 4-Methyl-3-(O-methylbenzyl)pentanenitrile                                             | 43.877                             | 29107-40-2  | 0.626         |
| (1-Benzyl-2-O-tolyl-ethyl)-isonitrile                                                 | 44.445                             | -           | 0.554         |
| Naphthalene-1,3,3-tricarbonitrile, 3,4,4a,5,6,7-hexahydro-2-amino-4-(4-methylphenyl)- | 49.680                             | 163978-39-0 | 0.292         |
| Naphthalene-1,3,3-tricarbonitrile, 3,4,4a,5,6,7-hexahydro-2-amino-4-(4-methylphenyl)- | 50.370                             | 163978-39-0 | 0.323         |
| <b>Brominated Compounds</b>                                                           | <b><math>\Sigma</math>(%.area)</b> |             | <b>0.316</b>  |
| Phenol, 2-bromo-                                                                      | 15.591                             | 95-56-7     | 0.199         |
| 5-Bromo-2-methoxy-1,3-dimethylbenzene                                                 | 23.559                             | -           | 0.117         |
| <b>Oxygenated Compounds</b>                                                           | <b><math>\Sigma</math>(%.area)</b> |             | <b>14.952</b> |
| Phenol                                                                                | 12.146                             | 108-95-2    | 3.775         |
| Phenol, 2-methyl-                                                                     | 14.630                             | 95-48-7     | 0.500         |
| Benzenemethanol, $\alpha$ -methyl-, (R)-                                              | 15.082                             | 4553-62-2   | 0.253         |
| Benzenemethanol, $\alpha,\alpha$ -dimethyl-                                           | 15.904                             | 617-94-7    | 1.238         |
| Phenol, 2,5-dimethyl-                                                                 | 16.580                             | 95-87-4     | 0.353         |
| p-Cumenol                                                                             | 20.028                             | 99-89-8     | 7.057         |
| Phenol, 2-methyl-5-(1-methylethyl)-                                                   | 22.055                             | 499-75-2    | 0.379         |
| Phenol, 2-(1-phenylethyl)-                                                            | 33.240                             | 4237-44-9   | 0.877         |
| Benzaldehyde, 2-methyl-, (2,4-dinitrophenyl)hydrazone                                 | 50.781                             | 1773-44-0   | 0.520         |
| <b>Non identified fraction</b>                                                        | <b><math>\Sigma</math>(%.area)</b> |             | <b>2.484</b>  |

**Table S10:** Classes of compounds, summation of peak areas, CAS number, and retention times of chemical compounds identified by GC-MS in bio-oil by thermal cracking of WEEE plastic at 450 °C, 1.0 atm, Reaction time=45 min, in semi-pilot scale two-stage reactor of 2.0 L.

| Chemical Compound                                         | RT (min)                          | CAS        | wi(%Area)     |
|-----------------------------------------------------------|-----------------------------------|------------|---------------|
| <b>Aromatic Hydrocarbons</b>                              | <b><math>\Sigma</math>(%area)</b> |            | <b>49.915</b> |
| Styrene                                                   | 9.728                             | 100-42-5   | 9.088         |
| Benzene, (1-methylethyl)-                                 | 10.710                            | 98-82-8    | 4.689         |
| Benzene, propyl-                                          | 11.688                            | 103-65-1   | 0.240         |
| $\alpha$ -Methylstyrene                                   | 12.584                            | 98-83-9    | 6.649         |
| Benzene, 1-propenyl-                                      | 14.092                            | 637-50-3   | 0.547         |
| Indene                                                    | 14.849                            | 95-13-6    | 0.458         |
| Biphenyl                                                  | 25.017                            | 92-52-4    | 0.301         |
| Diphenylmethane                                           | 26.329                            | 101-81-5   | 0.600         |
| Benzene, 1,1'-ethylidenebis-                              | 27.764                            | 612-00-0   | 0.572         |
| Bibenzyl                                                  | 28.688                            | 103-29-7   | 0.474         |
| Benzene, 1,1'-(1,3-propanediyl)bis-                       | 32.085                            | 1081-75-0  | 14.528        |
| Benzene, 1,1'-(3-methyl-1-propene-1,3-diyl)bis-           | 32.412                            | 7614-93-9  | 1.243         |
| Benzene, 1,1'-(1-methyl-1,3-propanediyl)bis-              | 32.600                            | 1520-44-1  | 2.361         |
| 1,2-Diphenylcyclopropane                                  | 33.636                            | 29881-14-9 | 2.146         |
| Benzene, 1,1'-(1,4-butanediyl)bis-                        | 34.021                            | 1083-56-3  | 0.649         |
| Benzene, 1,1'-(3-methyl-1-propene-1,3-diyl)bis-           | 34.386                            | 7614-93-9  | 0.577         |
| Benzene, 1,1'-(2-methyl-1-propenylidene)bis-              | 34.898                            | 781-33-9   | 1.054         |
| 1-(4-Methylphenyl)-4-phenylbuta-1,3-diene                 | 36.410                            | 37985-11-8 | 0.482         |
| Benzene, 1,1'-[3-(2-phenylethylidene)-1,5-pentanediy]bis- | 44.682                            | 55334-57-1 | 1.465         |
| Benzene, (1-methylhexadecyl)-                             | 45.088                            | 55125-25-2 | 0.482         |
| p-Terphenyl                                               | 45.436                            | 92-94-4    | 0.305         |
| 1-Propene, 3-(2-cyclopentenyl)-2-methyl-1,1-diphenyl-     | 49.302                            | -          | 0.178         |
| Benzene, 1,1'-(1,4-dimethyl-1-butene-1,4-diyl)bis-        | 51.646                            | 52161-54-3 | 0.414         |
| 1-Propene, 3-(2-cyclopentenyl)-2-methyl-1,1-diphenyl-     | 53.449                            | -          | 0.413         |
| <b>Polycyclic aromatic hydrocarbons (PAH)</b>             | <b><math>\Sigma</math>(%area)</b> |            | <b>9.602</b>  |
| Naphthalene                                               | 19.491                            | 91-20-3    | 0.851         |
| Naphthalene, 1-methyl-                                    | 22.770                            | 90-12-0    | 0.458         |
| Naphthalene, 2-methyl-                                    | 23.259                            | 91-57-6    | 0.710         |
| Naphthalene, 1,2,3,4-tetrahydro-1-phenyl-                 | 34.473                            | 3018-20-0  | 0.679         |
| Naphthalene, 1,2,3,4-tetrahydro-6-(phenylmethyl)-         | 35.372                            | 35310-85-1 | 0.242         |
| Naphthalene, 1-phenyl-                                    | 36.578                            | 605-02-7   | 2.621         |
| Naphthalene, 2-phenyl-                                    | 40.019                            | 612-94-2   | 2.234         |
| Naphthalene, 2-(phenylmethyl)-                            | 44.292                            | 613-59-2   | 1.807         |
| <b>Nitrogenated Compounds</b>                             | <b><math>\Sigma</math>(%area)</b> |            | <b>26.166</b> |
| Benzyl nitrile                                            | 17.566                            | 140-29-4   | 0.381         |
| Benzeneacetonitrile, $\alpha$ -methyl-                    | 18.434                            | 1823-91-2  | 0.731         |
| Benzenepropanenitrile                                     | 20.642                            | 645-59-0   | 0.348         |
| 1,2-Benzenedicarbonitrile                                 | 21.230                            | 91-15-6    | 0.694         |

|                                                                                       |                                    |             |               |
|---------------------------------------------------------------------------------------|------------------------------------|-------------|---------------|
| Cyclopropanecarbonitrile, 2-phenyl-, trans-                                           | 22.408                             | 5590-14-7   | 0.348         |
| Benzenebutanenitrile                                                                  | 23.461                             | 2046-18-6   | 13.460        |
| quinoline, 1,2-dihydro-1-methyl-2-methylene-                                          | 24.133                             |             | 0.865         |
| 3-Benzyl-4,5-dihydro-3H-pyrrole                                                       | 24.347                             | -           | 2.372         |
| 1,2,3,3a-Tetrahydropentalene, 1,1-dimethyl-3-cyanomethylene-                          | 24.851                             | -           | 0.218         |
| Cyclopropanecarbonitrile, 2-phenyl-, trans-                                           | 25.772                             | 5590-14-7   | 0.306         |
| 1H-Pyrrole, 1-(4-methylphenyl)-                                                       | 26.122                             | 827-60-1    | 0.324         |
| Quinoline, 4-ethyl-                                                                   | 27.451                             | 19020-26-9  | 0.381         |
| Naphthalene, 1-isocyano-                                                              | 28.187                             | 09/04/1984  | 1.408         |
| Naphthalene, 1-isocyano-                                                              | 28.899                             | 09/04/1984  | 0.727         |
| 1-Naphthaleneacetonitrile                                                             | 32.306                             | 132-75-2    | 1.055         |
| Octadecanenitrile                                                                     | 43.043                             | 638-65-3    | 0.653         |
| 4-Methyl-3-(O-methylbenzyl)pentanenitrile                                             | 43.877                             | 29107-40-2  | 0.730         |
| (1-Benzyl-2-O-tolyl-ethyl)-isonitrile                                                 | 44.445                             | -           | 0.630         |
| Naphthalene-1,3,3-tricarbonitrile, 3,4,4a,5,6,7-hexahydro-2-amino-4-(4-methylphenyl)- | 49.680                             | 163978-39-0 | 0.286         |
| Naphthalene-1,3,3-tricarbonitrile, 3,4,4a,5,6,7-hexahydro-2-amino-4-(4-methylphenyl)- | 50.370                             | 163978-39-0 | 0.249         |
| <b>Brominated Compounds</b>                                                           | <b><math>\Sigma</math>(%.area)</b> |             | <b>0.168</b>  |
| Phenol, 2-bromo-                                                                      | 15.591                             | 95-56-7     | 0.096         |
| 5-Bromo-2-methoxy-1,3-dimethylbenzene                                                 | 23.559                             | -           | 0.072         |
| <b>Oxygenated Compounds</b>                                                           | <b><math>\Sigma</math>(%.area)</b> |             | <b>11.687</b> |
| Phenol                                                                                | 12.146                             | 108-95-2    | 2.659         |
| Phenol, 2-methyl-                                                                     | 14.630                             | 95-48-7     | 0.510         |
| Benzenemethanol, $\alpha,\alpha$ -dimethyl-                                           | 15.904                             | 617-94-7    | 0.826         |
| Phenol, 2,5-dimethyl-                                                                 | 16.580                             | 95-87-4     | 0.362         |
| p-Cumenol                                                                             | 20.028                             | 99-89-8     | 5.613         |
| Phenol, 2-methyl-5-(1-methylethyl)-                                                   | 22.055                             | 499-75-2    | 0.341         |
| Phenol, 2-(1-phenylethyl)-                                                            | 33.240                             | 4237-44-9   | 0.893         |
| Benzaldehyde, 2-methyl-, (2,4-dinitrophenyl)hydrazone                                 | 50.781                             | 1773-44-0   | 0.483         |
| <b>Non identified fraction</b>                                                        | <b><math>\Sigma</math>(%.area)</b> |             | <b>2.462</b>  |

**Table S11:** Classes of compounds, summation of peak areas, CAS number, and retention times of chemical compounds identified by GC-MS in bio-oil by thermal cracking of WEEE plastic at 450 °C, 1.0 atm, Reaction time=60 min, in semi-pilot scale two-stage reactor of 2.0 L.

| Chemical Compound                                         | RT (min)                          | CAS         | wi(%Area)     |
|-----------------------------------------------------------|-----------------------------------|-------------|---------------|
| <b>Aromatic Hydrocarbons</b>                              | <b><math>\Sigma</math>(%area)</b> |             | <b>47.045</b> |
| Styrene                                                   | 9.728                             | 100-42-5    | 7.090         |
| Benzene, (1-methylethyl)-                                 | 10.710                            | 98-82-8     | 3.750         |
| Benzene, propyl-                                          | 11.688                            | 103-65-1    | 0.204         |
| $\alpha$ -Methylstyrene                                   | 12.584                            | 98-83-9     | 5.945         |
| Benzene, 1-propenyl-                                      | 14.092                            | 637-50-3    | 0.506         |
| Indene                                                    | 14.849                            | 95-13-6     | 0.534         |
| Biphenyl                                                  | 25.017                            | 92-52-4     | 0.398         |
| Diphenylmethane                                           | 26.329                            | 101-81-5    | 0.678         |
| Benzene, 1,1'-ethylidenebis-                              | 27.764                            | 612-00-0    | 0.633         |
| Bibenzyl                                                  | 28.688                            | 103-29-7    | 0.499         |
| Benzene, 1,1'-(1,3-propanediyl)bis-                       | 32.085                            | 1081-75-0   | 14.738        |
| Benzene, 1,1'-(3-methyl-1-propene-1,3-diyl)bis-           | 32.412                            | 7614-93-9   | 1.278         |
| Benzene, 1,1'-(1-methyl-1,3-propanediyl)bis-              | 32.600                            | 1520-44-1   | 2.394         |
| 1,2-Diphenylcyclopropane                                  | 33.636                            | 29881-14-9  | 2.299         |
| Benzene, 1,1'-(1,4-butanediyl)bis-                        | 34.021                            | 1083-56-3   | 0.601         |
| Benzene, 1,1'-(3-methyl-1-propene-1,3-diyl)bis-           | 34.386                            | 7614-93-9   | 0.583         |
| Benzene, 1,1'-(2-methyl-1-propenylidene)bis-              | 34.898                            | 781-33-9    | 1.089         |
| 1-(4-Methylphenyl)-4-phenylbuta-1,3-diene                 | 36.410                            | 37985-11-8  | 0.503         |
| Benzene, 1,1'-[3-(2-phenylethylidene)-1,5-pentanedyl]bis- | 44.682                            | 55334-57-1  | 1.468         |
| Benzene, (1-methylhexadecyl)-                             | 45.088                            | 55125-25-2  | 0.463         |
| p-Terphenyl                                               | 45.436                            | 92-94-4     | 0.316         |
| 1-Propene, 3-(2-cyclopentenyl)-2-methyl-1,1-diphenyl-     | 49.302                            | -           | 0.200         |
| Benzene, 1,1'-(1,4-dimethyl-1-butene-1,4-diyl)bis-        | 51.646                            | 52161-54-3  | 0.486         |
| 1-Propene, 3-(2-cyclopentenyl)-2-methyl-1,1-diphenyl-     | 53.449                            | -           | 0.390         |
| <b>Polycyclic aromatic hydrocarbons (PAH)</b>             | <b><math>\Sigma</math>(%area)</b> |             | <b>11.197</b> |
| Naphthalene                                               | 19.491                            | 91-20-3     | 1.031         |
| Naphthalene, 1-methyl-                                    | 22.770                            | 90-12-0     | 0.576         |
| Naphthalene, 2-methyl-                                    | 23.259                            | 91-57-6     | 0.825         |
| Naphthalene, 1,2,3,4-tetrahydro-1-phenyl-                 | 34.473                            | 3018-20-0   | 0.753         |
| Naphthalene, 1,2,3,4-tetrahydro-6-(phenylmethyl)-         | 35.372                            | 35310-85-1  | 0.241         |
| Naphthalene, 1-phenyl-                                    | 36.578                            | 605-02-7    | 2.713         |
| Naphthalene, 2-phenyl-                                    | 40.019                            | 612-94-2    | 2.518         |
| 1,2,3,4-Tetrahydro-1-phenyl-1,2,3-methanonaphthalene      | 40.387                            | 138089-69-7 | 0.559         |
| Naphthalene, 2-(phenylmethyl)-                            | 44.292                            | 613-59-2    | 1.981         |
| <b>Nitrogenated Compounds</b>                             | <b><math>\Sigma</math>(%area)</b> |             | <b>27.411</b> |
| Benzyl nitrile                                            | 17.566                            | 140-29-4    | 0.463         |
| Benzeneacetonitrile, $\alpha$ -methyl-                    | 18.434                            | 1823-91-2   | 0.782         |
| Benzenepropanenitrile                                     | 20.642                            | 645-59-0    | 0.365         |

|                                                                                      |                                    |             |               |
|--------------------------------------------------------------------------------------|------------------------------------|-------------|---------------|
| 1,2-Benzenedicarbonitrile                                                            | 21.230                             | 91-15-6     | 0.699         |
| Cyclopropanecarbonitrile, 2-phenyl-, trans-                                          | 22.408                             | 5590-14-7   | 0.433         |
| Benzenebutanenitrile                                                                 | 23.461                             | 2046-18-6   | 13.871        |
| quinoline, 1,2-dihydro-1-methyl-2-methylene-                                         | 24.133                             |             | 0.890         |
| 3-Benzyl-4,5-dihydro-3H-pyrrole                                                      | 24.347                             | -           | 2.451         |
| 1,2,3,3a-Tetrahydropentalene, 1,1-dimethyl-3-cyanomethylene-                         | 24.851                             | -           | 0.221         |
| Cyclopropanecarbonitrile, 2-phenyl-, trans-                                          | 25.772                             | 5590-14-7   | 0.337         |
| 1H-Pyrrole, 1-(4-methylphenyl)-                                                      | 26.122                             | 827-60-1    | 0.375         |
| Quinoline, 4-ethyl-                                                                  | 27.451                             | 19020-26-9  | 0.381         |
| Naphthalene, 1-isocyano-                                                             | 28.187                             | 09/04/1984  | 1.487         |
| Naphthalene, 1-isocyano-                                                             | 28.899                             | 09/04/1984  | 0.837         |
| 1-Naphthaleneacetonitrile                                                            | 32.306                             | 132-75-2    | 1.155         |
| Octadecanenitrile                                                                    | 43.043                             | 638-65-3    | 0.662         |
| 4-Methyl-3-(O-methylbenzyl)pentanenitrile                                            | 43.877                             | 29107-40-2  | 0.738         |
| (1-Benzyl-2-O-tolyl-ethyl)-isonitrile                                                | 44.445                             | -           | 0.686         |
| Naphthalene-1,3,3-tricarbonitrile, 3,4,4a,5,6,7-hexahdro-2-amino-4-(4-methylphenyl)- | 49.680                             | 163978-39-0 | 0.281         |
| Naphthalene-1,3,3-tricarbonitrile, 3,4,4a,5,6,7-hexahdro-2-amino-4-(4-methylphenyl)- | 50.370                             | 163978-39-0 | 0.297         |
| <b>Brominated Compounds</b>                                                          | <b><math>\Sigma</math>(%.area)</b> |             | <b>0.162</b>  |
| Phenol, 2-bromo-                                                                     | 15.591                             | 95-56-7     | 0.103         |
| 5-Bromo-2-methoxy-1,3-dimethylbenzene                                                | 23.559                             | -           | 0.059         |
| <b>Oxygenated Compounds</b>                                                          | <b><math>\Sigma</math>(%.area)</b> |             | <b>11.606</b> |
| Phenol                                                                               | 12.146                             | 108-95-2    | 2.642         |
| Phenol, 2-methyl-                                                                    | 14.630                             | 95-48-7     | 0.560         |
| Benzenemethanol, $\alpha,\alpha$ -dimethyl-                                          | 15.904                             | 617-94-7    | 0.631         |
| Phenol, 2,5-dimethyl-                                                                | 16.580                             | 95-87-4     | 0.424         |
| p-Cumenol                                                                            | 20.028                             | 99-89-8     | 5.521         |
| Phenol, 2-methyl-5-(1-methylethyl)-                                                  | 22.055                             | 499-75-2    | 0.353         |
| Phenol, 2-(1-phenylethyl)-                                                           | 33.240                             | 4237-44-9   | 1.000         |
| Benzaldehyde, 2-methyl-, (2,4-dinitrophenyl)hydrazone                                | 50.785                             | 1773-44-0   | 0.475         |
| <b>Non identified fraction</b>                                                       | <b><math>\Sigma</math>(%.area)</b> |             | <b>2.581</b>  |

**Table S12:** Classes of compounds, summation of peak areas, CAS number, and retention times of chemical compounds identified by GC-MS in bio-oil by thermal cracking of WEEE plastic at 500 °C, 1.0 atm, Reaction time=15 min, in semi-pilot scale two-stage reactor of 2.0 L.

| Chemical Compound                                      | RT (min)                          | CAS        | wi(%Area)     |
|--------------------------------------------------------|-----------------------------------|------------|---------------|
| <b>Aromatic Hydrocarbons</b>                           | <b><math>\Sigma</math>(%area)</b> |            | <b>66.150</b> |
| Styrene                                                | 9.731                             | 100-42-5   | 10.183        |
| $\alpha$ -Methylstyrene                                | 12.585                            | 98-83-9    | 4.406         |
| Benzene, 1,1'-(1,3-propanediyl)bis-                    | 32.086                            | 1081-75-0  | 26.935        |
| Benzene, 1,1'-(3-methyl-1-propene-1,3-diyl)bis-        | 32.420                            | 7614-93-9  | 4.077         |
| Benzene, 1,1'-(1-methyl-1,3-propanediyl)bis-           | 32.601                            | 1520-44-1  | 3.362         |
| 1,2-Diphenylcyclopropane                               | 33.644                            | 29881-14-9 | 4.144         |
| Benzene, 1,1'-(3-methyl-1-propene-1,3-diyl)bis-        | 34.388                            | 7614-93-9  | 2.355         |
| Benzene, 1,1'-(1,1,2,2-tetramethyl-1,2-ethanediyl)bis- | 34.745                            | 1889-67-4  | 2.194         |
| Benzene, 1,1'-(2-methyl-1-propenylidene)bis-           | 34.908                            | 781-33-9   | 8.494         |
| <b>Polycyclic aromatic hydrocarbons (PAH)</b>          | <b><math>\Sigma</math>(%area)</b> |            | <b>3.511</b>  |
| 1,9-Dihdropyrene                                       | 36.584                            | 28862-02-4 | 3.511         |
| <b>Nitrogenated Compounds</b>                          | <b><math>\Sigma</math>(%area)</b> |            | <b>13.450</b> |
| Benzenebutanenitrile                                   | 23.450                            | 2046-18-6  | 13.450        |
| <b>Oxygenated Compounds</b>                            | <b><math>\Sigma</math>(%area)</b> |            | <b>16.889</b> |
| Phenol                                                 | 12.162                            | 108-95-2   | 10.765        |
| Phenol, 3-(1-methylethyl)-                             | 20.040                            | 618-45-1   | 6.124         |

**Table S13:** Classes of compounds, summation of peak areas, CAS number, and retention times of chemical compounds identified by GC-MS in bio-oil by thermal cracking of WEEE plastic at 500 °C, 1.0 atm, Reaction time=30 min, in semi-pilot scale two-stage reactor of 2.0 L.

| Chemical Compound                                         | RT (min)        | CAS        | wi(%Area)     |
|-----------------------------------------------------------|-----------------|------------|---------------|
| <b>Aromatic Hydrocarbons</b>                              | <b>Σ(%area)</b> |            | <b>52.762</b> |
| Styrene                                                   | 9.728           | 100-42-5   | 6.568         |
| Benzene, (1-methylethyl)-                                 | 10.710          | 98-82-8    | 5.782         |
| Benzene, 2-propenyl-                                      | 11.420          | 300-57-2   | 0.118         |
| Benzene, propyl-                                          | 11.687          | 103-65-1   | 0.21          |
| α-Methylstyrene                                           | 12.584          | 98-83-9    | 2.414         |
| Benzene, 1-ethenyl-2-methyl-                              | 12.919          | 611-15-4   | 0.122         |
| Benzene, 1-propenyl-                                      | 14.092          | 637-50-3   | 0.371         |
| Diphenylmethane                                           | 26.329          | 101-81-5   | 0.325         |
| Bibenzyl                                                  | 28.688          | 103-29-7   | 0.368         |
| Benzene, 1,1'-(1,3-propanediyl)bis-                       | 32.085          | 1081-75-0  | 10.646        |
| Benzene, 1,1'-(3-methyl-1-propene-1,3-diyl)bis-           | 32.412          | 7614-93-9  | 1.041         |
| Benzene, 1,1'-(1-methyl-1,3-propanediyl)bis-              | 32.600          | 1520-44-1  | 1.941         |
| 1,2-Diphenylcyclopropane                                  | 33.636          | 29881-14-9 | 1.617         |
| Benzene, 1,1'-(1,4-butanediyl)bis-                        | 34.021          | 1083-56-3  | 0.445         |
| Benzene, 1,1'-(3-methyl-1-propene-1,3-diyl)bis-           | 34.386          | 7614-93-9  | 1.353         |
| 2,4-Diphenyl-4-methyl-1-pentene                           | 34.748          | -          | 5.009         |
| Benzene, 1,1'-(2-methyl-1-propenyldiene)bis-              | 34.898          | 781-33-9   | 4.939         |
| 2,4-Diphenyl-4-methyl-2(E)-pentene                        | 35.518          | 22768-22-5 | 3.963         |
| Benzene, 1,1'-[3-(2-phenylethylidene)-1,5-pentanediy]bis- | 43.694          | 55334-57-1 | 0.407         |
| Benzene, 1,1'-[3-(2-phenylethylidene)-1,5-pentanediy]bis- | 44.682          | 55334-57-1 | 1.053         |
| Benzene, (1-methylhexadecyl)-                             | 45.093          | 55125-25-2 | 0.351         |
| 1-Propene, 3-(2-cyclopentenyl)-2-methyl-1,1-diphenyl-     | 46.882          | -          | 0.277         |
| Benzene, 1,1'-(1,1,2,2-tetramethyl-1,2-ethanediyl)bis-    | 48.268          | 1889-67-4  | 0.971         |
| 1-Propene, 3-(2-cyclopentenyl)-2-methyl-1,1-diphenyl-     | 49.306          | -          | 0.458         |
| Benzene, 1,1'-(1,4-dimethyl-1-butene-1,4-diyl)bis-        | 53.077          | 52161-54-3 | 0.437         |
| 1-Propene, 3-(2-cyclopentenyl)-2-methyl-1,1-diphenyl-     | 53.449          | -          | 1.576         |
| <b>Aliphatic Hydrocarbons</b>                             | <b>Σ(%area)</b> |            | <b>0.422</b>  |
| Pentadecane                                               | 27.477          | 629-62-9   | 0.422         |
| <b>Polycyclic aromatic hydrocarbons (PAH)</b>             | <b>Σ(%area)</b> |            | <b>9.686</b>  |
| Naphthalene                                               | 19.491          | 91-20-3    | 0.499         |
| Naphthalene, 2-methyl-                                    | 23.259          | 91-57-6    | 0.239         |
| Naphthalene, 1,2,3,4-tetrahydro-1-phenyl-                 | 34.473          | 3018-20-0  | 0.445         |
| Naphthalene, 1,2,3,4-tetrahydro-6-(phenylmethyl)-         | 35.372          | 35310-85-1 | 1.94          |
| Naphthalene, 1-phenyl-                                    | 36.578          | 605-02-7   | 2.006         |
| Naphthalene, 2,7-bis(1,1-dimethylethyl)-                  | 37.221          | 10275-58-8 | 2.982         |
| Naphthalene, 2-phenyl-                                    | 40.019          | 612-94-2   | 0.545         |
| Naphthalene, 2-(phenylmethyl)-                            | 44.292          | 613-59-2   | 1.03          |
| <b>Nitrogenated Compounds</b>                             | <b>Σ(%area)</b> |            | <b>14.489</b> |



|                                                                                      |                                    |             |               |
|--------------------------------------------------------------------------------------|------------------------------------|-------------|---------------|
| Isobutyronitrile                                                                     | 3.319                              | 78-82-0     | 0.058         |
| Benzonitrile                                                                         | 12.687                             | 100-47-0    | 0.053         |
| Benzeneacetonitrile, $\alpha$ -methyl-                                               | 18.434                             | 1823-91-2   | 0.343         |
| 1,2-Benzenedicarbonitrile                                                            | 21.230                             | 91-15-6     | 0.339         |
| Benzenebutanenitrile                                                                 | 23.450                             | 2046-18-6   | 7.808         |
| 3-Benzyl-4,5-dihydro-3H-pyrrole                                                      | 24.342                             | -           | 0.662         |
| 1,2,3,3a-Tetrahydropentalene, 1,1-dimethyl-3-cyanomethylene-                         | 24.847                             | -           | 0.322         |
| 1H-Pyrrole, 1-(4-methylphenyl)-                                                      | 26.122                             | 827-60-1    | 0.224         |
| Naphthalene, 1-isocyano-                                                             | 28.187                             | 09/04/1984  | 0.6           |
| 1-Naphthaleneacetonitrile                                                            | 32.306                             | 132-75-2    | 0.531         |
| (1-Benzyl-2-O-tolyl-ethyl)-isonitrile                                                | 35.167                             | -           | 0.487         |
| Octadecanenitrile                                                                    | 43.043                             | 638-65-3    | 1.061         |
| (1-Benzyl-2-O-tolyl-ethyl)-isonitrile                                                | 44.445                             | -           | 0.363         |
| Naphthalene-1,3,3-tricarbonitrile, 3,4,4a,5,6,7-hexahdro-2-amino-4-(4-methylphenyl)- | 49.681                             | 163978-39-0 | 0.465         |
| Naphthalene-1,3,3-tricarbonitrile, 3,4,4a,5,6,7-hexahdro-2-amino-4-(4-methylphenyl)- | 50.378                             | 163978-39-0 | 0.566         |
| 2-(4-Methoxy-2,6-dimethylphenyl)-3-methyl-2H-benzo[g]indazole                        | 52.204                             | -           | 0.607         |
| <b>Brominated Compounds</b>                                                          | <b><math>\Sigma</math>(%.area)</b> |             | <b>0.456</b>  |
| 5-Bromo-2-methoxy-1,3-dimethylbenzene                                                | 23.559                             | 1836-06-2   | 0.456         |
| <b>Oxygenated Compounds</b>                                                          | <b><math>\Sigma</math>(%.area)</b> |             | <b>17.515</b> |
| Ethyl Acetate                                                                        | 3.128                              | 141-78-6    | 0.017         |
| Phenol                                                                               | 12.146                             | 108-95-2    | 3.229         |
| Benzenemethanol, $\alpha$ -methyl-, (R)-                                             | 15.082                             | 1517-69-7   | 0.617         |
| p-Cumenol                                                                            | 20.028                             | 99-89-8     | 4.335         |
| Phenol, o-( $\alpha,\alpha$ -dimethylbenzyl)-                                        | 33.109                             | 18168-40-6  | 0.53          |
| Phenol, 2-(1-phenylethyl)-                                                           | 33.240                             | 4237-44-9   | 2.657         |
| Phenol, 4-(1-methyl-1-phenylethyl)-                                                  | 36.122                             | 599-64-4    | 1.721         |
| 2-tert-Butyl-6-( $\alpha$ -methylbenzyl)phenol                                       | 37.124                             | 17959-02-3  | 0.857         |
| 2,3-Dimethyl-1,4,4a,9a-tetrahydroanthracene-9,10-dione                               | 49.741                             | 2670-23-7   | 0.556         |
| Phenol, 4-(1-methyl-1-phenylethyl)-                                                  | 51.109                             | 599-64-4    | 0.598         |
| Phenol, 2,4-bis(1-phenylethyl)-                                                      | 51.574                             | 2769-94-0   | 1.918         |
| 4-(2-Methyl-1-cyclohexenyl)-trans-3-buten-2-one 2,4-dinitrophenylhydrazone           | 51.822                             | -           | 0.48          |
| <b>Non identified fraction</b>                                                       | <b><math>\Sigma</math>(%.area)</b> |             | <b>4.670</b>  |

**Table S14:** Classes of compounds, summation of peak areas, CAS number, and retention times of chemical compounds identified by GC-MS in bio-oil by thermal cracking of WEEE plastic at 500 °C, 1.0 atm, Reaction time=45 min, in semi-pilot scale two-stage reactor of 2.0 L.

| Chemical Compound                                         | RT (min)                          | CAS        | wi(%Area)     |
|-----------------------------------------------------------|-----------------------------------|------------|---------------|
| <b>Aromatic Hydrocarbons</b>                              | <b><math>\Sigma</math>(%area)</b> |            | <b>49.938</b> |
| Styrene                                                   | 9.728                             | 100-42-5   | 6.303         |
| Benzene, (1-methylethyl)-                                 | 10.710                            | 98-82-8    | 3.884         |
| Benzene, propyl-                                          | 11.687                            | 103-65-1   | 0.194         |
| $\alpha$ -Methylstyrene                                   | 12.584                            | 98-83-9    | 5.655         |
| Benzene, 1-propenyl-                                      | 14.092                            | 637-50-3   | 0.492         |
| Diphenylmethane                                           | 26.329                            | 101-81-5   | 0.644         |
| Benzene, 1,1'-ethylidenebis-                              | 27.764                            | 612-00-0   | 0.486         |
| Bibenzyl                                                  | 28.688                            | 103-29-7   | 0.504         |
| Benzene, 1,1'-(1,3-propanediyl)bis-                       | 32.085                            | 1081-75-0  | 16.286        |
| Benzene, 1,1'-(3-methyl-1-propene-1,3-diyl)bis-           | 32.412                            | 7614-93-9  | 1.548         |
| Benzene, 1,1'-(1-methyl-1,3-propanediyl)bis-              | 32.600                            | 1520-44-1  | 2.802         |
| 1,2-Diphenylcyclopropane                                  | 33.636                            | 29881-14-9 | 2.62          |
| Benzene, 1,1'-(1,4-butanediyl)bis-                        | 34.021                            | 1083-56-3  | 0.702         |
| Benzene, 1,1'-(3-methyl-1-propene-1,3-diyl)bis-           | 34.386                            | 7614-93-9  | 0.995         |
| 2,4-Diphenyl-4-methyl-1-pentene                           | 34.748                            | -          | 0.554         |
| Benzene, 1,1'-(2-methyl-1-propenylidene)bis-              | 34.898                            | 781-33-9   | 2.892         |
| 1-(4-Methylphenyl)-4-phenylbuta-1,3-diene                 | 36.410                            | 37985-11-8 | 0.546         |
| Benzene, 1,1'-[3-(2-phenylethylidene)-1,5-pentanediy]bis- | 44.682                            | 55334-57-1 | 1.44          |
| Benzene, (1-methylhexadecyl)-                             | 45.093                            | 55125-25-2 | 0.457         |
| 1-Propene, 3-(2-cyclopentenyl)-2-methyl-1,1-diphenyl-     | 49.306                            | -          | 0.351         |
| 1-Propene, 3-(2-cyclopentenyl)-2-methyl-1,1-diphenyl-     | 53.449                            | -          | 0.583         |
| <b>Polycyclic aromatic hydrocarbons (PAH)</b>             | <b><math>\Sigma</math>(%area)</b> |            | <b>8.596</b>  |
| Naphthalene                                               | 19.491                            | 91-20-3    | 0.59          |
| Naphthalene, 1-methyl-                                    | 22.770                            | 90-12-0    | 0.305         |
| Naphthalene, 2-methyl-                                    | 23.259                            | 91-57-6    | 0.462         |
| Naphthalene, 1,2,3,4-tetrahydro-1-phenyl-                 | 34.473                            | 3018-20-0  | 0.657         |
| Naphthalene, 1,2,3,4-tetrahydro-6-(phenylmethyl)-         | 35.372                            | 35310-85-1 | 0.554         |
| Naphthalene, 1-phenyl-                                    | 36.578                            | 605-02-7   | 2.087         |
| Naphthalene, 2,7-bis(1,1-dimethylethyl)-                  | 37.221                            | 10275-58-8 | 1.456         |
| Naphthalene, 2-phenyl-                                    | 40.019                            | 612-94-2   | 1.181         |
| Naphthalene, 2-(phenylmethyl)-                            | 44.292                            | 613-59-2   | 1.304         |
| <b>Nitrogenated Compounds</b>                             | <b><math>\Sigma</math>(%area)</b> |            | <b>27.427</b> |
| Benzyl nitrile                                            | 17.566                            | 140-29-4   | 0.331         |
| Benzeneacetonitrile, $\alpha$ -methyl-                    | 18.434                            | 1823-91-2  | 0.709         |
| Benzenepropanenitrile                                     | 20.642                            | 645-59-0   | 0.321         |
| 1,2-Benzenedicarbonitrile                                 | 21.230                            | 91-15-6    | 0.618         |
| Cyclopropanecarbonitrile, 2-phenyl-, trans-               | 22.408                            | 5590-14-7  | 0.343         |
| Benzenebutanenitrile                                      | 23.461                            | 2046-18-6  | 15.693        |

|                                                                                       |                                    |             |               |
|---------------------------------------------------------------------------------------|------------------------------------|-------------|---------------|
| Cyclopropanecarbonitrile, 2-phenyl-, trans-                                           | 23.927                             | 5590-14-7   | 0.27          |
| quinoline, 1,2-dihydro-1-methyl-2-methylene-                                          | 24.133                             |             | 1.037         |
| 3-Benzyl-4,5-dihydro-3H-pyrrole                                                       | 24.347                             | -           | 2.32          |
| 1,2,3,3a-Tetrahydropentalene, 1,1-dimethyl-3-cyanomethylene-                          | 24.847                             | -           | 0.308         |
| Cyclopropanecarbonitrile, 2-phenyl-, trans-                                           | 25.772                             | 5590-14-7   | 0.309         |
| 1H-Pyrrole, 1-(4-methylphenyl)-                                                       | 26.122                             | 827-60-1    | 0.462         |
| Quinoline, 4-ethyl-                                                                   | 27.451                             | 19020-26-9  | 0.477         |
| Naphthalene, 1-isocyano-                                                              | 28.187                             | 09/04/1984  | 1.044         |
| Naphthalene, 1-isocyano-                                                              | 28.899                             | 09/04/1984  | 0.352         |
| 1-Naphthaleneacetonitrile                                                             | 32.306                             | 132-75-2    | 0.948         |
| Octadecanenitrile                                                                     | 43.043                             | 638-65-3    | 0.661         |
| (1-Benzyl-2-O-tolyl-ethyl)-isonitrile                                                 | 44.445                             | -           | 0.538         |
| Naphthalene-1,3,3-tricarbonitrile, 3,4,4a,5,6,7-hexahydro-2-amino-4-(4-methylphenyl)- | 49.681                             | 163978-39-0 | 0.324         |
| Naphthalene-1,3,3-tricarbonitrile, 3,4,4a,5,6,7-hexahydro-2-amino-4-(4-methylphenyl)- | 50.378                             | 163978-39-0 | 0.362         |
| <b>Brominated Compounds</b>                                                           | <b><math>\Sigma</math>(%.area)</b> |             | <b>0.266</b>  |
| 5-Bromo-2-methoxy-1,3-dimethylbenzene                                                 | 23.559                             | 1836-06-2   | 0.266         |
| <b>Oxygenated Compounds</b>                                                           | <b><math>\Sigma</math>(%.area)</b> |             | <b>12.966</b> |
| Phenol                                                                                | 12.146                             | 108-95-2    | 2.836         |
| Phenol, 2-methyl-                                                                     | 14.630                             | 95-48-7     | 0.532         |
| Benzenemethanol, $\alpha,\alpha$ -dimethyl-                                           | 15.904                             | 617-94-7    | 1.371         |
| p-Cumenol                                                                             | 20.028                             | 99-89-8     | 6.225         |
| Phenol, 2-methyl-5-(1-methylethyl)-                                                   | 22.055                             | 499-75-2    | 0.401         |
| Phenol, 2-(1-phenylethyl)-                                                            | 33.240                             | 4237-44-9   | 1.386         |
| Phenol, 4-(1-methyl-1-phenylethyl)-                                                   | 36.122                             | 599-64-4    | 0.215         |
| <b>Non identified fraction</b>                                                        | <b><math>\Sigma</math>(%.area)</b> |             | <b>0.807</b>  |

**Table S15:** Classes of compounds, summation of peak areas, CAS number, and retention times of chemical compounds identified by GC-MS in bio-oil by thermal cracking of WEEE plastic at 500 °C, 1.0 atm, Reaction time=60 min, in semi-pilot scale two-stage reactor of 2.0 L.

| Chemical Compound                                         | RT (min)                          | CAS        | wi(%Area)     |
|-----------------------------------------------------------|-----------------------------------|------------|---------------|
| <b>Aromatic Hydrocarbons</b>                              | <b><math>\Sigma</math>(%area)</b> |            | <b>47.596</b> |
| Styrene                                                   | 9.728                             | 100-42-5   | 6.379         |
| Benzene, (1-methylethyl)-                                 | 10.710                            | 98-82-8    | 3.546         |
| Benzene, propyl-                                          | 11.687                            | 103-65-1   | 0.205         |
| $\alpha$ -Methylstyrene                                   | 12.584                            | 98-83-9    | 4.996         |
| Benzene, 1-propenyl-                                      | 14.092                            | 637-50-3   | 0.52          |
| Indene                                                    | 14.848                            | 95-13-6    | 0.326         |
| Biphenyl                                                  | 25.017                            | 92-52-4    | 0.352         |
| Diphenylmethane                                           | 26.329                            | 101-81-5   | 0.743         |
| Benzene, 1,1'-ethylidenebis-                              | 27.764                            | 612-00-0   | 0.597         |
| Bibenzyl                                                  | 28.688                            | 103-29-7   | 0.571         |
| Benzene, 1,1'-(1,3-propanediyl)bis-                       | 32.085                            | 1081-75-0  | 14.826        |
| Benzene, 1,1'-(3-methyl-1-propene-1,3-diyl)bis-           | 32.412                            | 7614-93-9  | 1.534         |
| Benzene, 1,1'-(1-methyl-1,3-propanediyl)bis-              | 32.600                            | 1520-44-1  | 2.487         |
| 1,2-Diphenylcyclopropane                                  | 33.636                            | 29881-14-9 | 2.931         |
| Benzene, 1,1'-(1,4-butanediyl)bis-                        | 34.021                            | 1083-56-3  | 0.663         |
| Benzene, 1,1'-(3-methyl-1-propene-1,3-diyl)bis-           | 34.386                            | 7614-93-9  | 0.926         |
| 2,4-Diphenyl-4-methyl-1-pentene                           | 34.748                            | -          | 0.236         |
| Benzene, 1,1'-(2-methyl-1-propenylidene)bis-              | 34.898                            | 781-33-9   | 2.667         |
| 1-(4-Methylphenyl)-4-phenylbuta-1,3-diene                 | 36.410                            | 37985-11-8 | 0.514         |
| Benzene, 1,1'-[3-(2-phenylethylidene)-1,5-pentanediy]bis- | 44.682                            | 55334-57-1 | 1.641         |
| Benzene, (1-methylhexadecyl)-                             | 45.093                            | 55125-25-2 | 0.479         |
| 1-Propene, 3-(2-cyclopentenyl)-2-methyl-1,1-diphenyl-     | 53.449                            | -          | 0.457         |
| <b>Polycyclic aromatic hydrocarbons (PAH)</b>             | <b><math>\Sigma</math>(%area)</b> |            | <b>10.933</b> |
| Naphthalene                                               | 19.491                            | 91-20-3    | 1.008         |
| Naphthalene, 1-methyl-                                    | 22.770                            | 90-12-0    | 0.53          |
| Naphthalene, 2-methyl-                                    | 23.259                            | 91-57-6    | 0.699         |
| Naphthalene, 1,2,3,4-tetrahydro-1-phenyl-                 | 34.473                            | 3018-20-0  | 0.759         |
| Naphthalene, 1,2,3,4-tetrahydro-6-(phenylmethyl)-         | 35.372                            | 35310-85-1 | 0.529         |
| Naphthalene, 1-phenyl-                                    | 36.578                            | 605-02-7   | 2.266         |
| Naphthalene, 2,7-bis(1,1-dimethylethyl)-                  | 37.221                            | 10275-58-8 | 1.18          |
| Naphthalene, 2-phenyl-                                    | 40.019                            | 612-94-2   | 2.138         |
| Naphthalene, 2-(phenylmethyl)-                            | 44.292                            | 613-59-2   | 1.824         |
| <b>Nitrogenated Compounds</b>                             | <b><math>\Sigma</math>(%area)</b> |            | <b>28.932</b> |
| Benzyl nitrile                                            | 17.566                            | 140-29-4   | 0.408         |
| Benzeneacetoneitrile, $\alpha$ -methyl-                   | 18.434                            | 1823-91-2  | 0.777         |
| Benzenepropanenitrile                                     | 20.642                            | 645-59-0   | 0.376         |
| 1,2-Benzenedicarbonitrile                                 | 21.230                            | 91-15-6    | 0.548         |
| Cyclopropanecarbonitrile, 2-phenyl-, trans-               | 22.408                            | 5590-14-7  | 0.432         |

|                                                                                       |                 |             |               |
|---------------------------------------------------------------------------------------|-----------------|-------------|---------------|
| Benzenebutanenitrile                                                                  | 23.461          | 2046-18-6   | 14.999        |
| Cyclopropanecarbonitrile, 2-phenyl-, trans-                                           | 23.927          | 5590-14-7   | 0.267         |
| quinoline, 1,2-dihydro-1-methyl-2-methylene-                                          | 24.133          |             | 1.044         |
| 3-Benzyl-4,5-dihydro-3H-pyrrole                                                       | 24.347          | -           | 2.42          |
| 1,2,3,3a-Tetrahydropentalene, 1,1-dimethyl-3-cyanomethylene-                          | 24.847          | -           | 0.279         |
| Cyclopropanecarbonitrile, 2-phenyl-, trans-                                           | 25.772          | 5590-14-7   | 0.355         |
| 1H-Pyrrole, 1-(4-methylphenyl)-                                                       | 26.122          | 827-60-1    | 0.435         |
| Quinoline, 4-ethyl-                                                                   | 27.451          | 19020-26-9  | 0.454         |
| Naphthalene, 1-isocyano-                                                              | 28.187          | 09/04/1984  | 1.114         |
| Naphthalene, 1-isocyano-                                                              | 28.899          | 09/04/1984  | 0.754         |
| 1-Naphthaleneacetonitrile                                                             | 32.306          | 132-75-2    | 1.174         |
| Octadecanenitrile                                                                     | 43.043          | 638-65-3    | 0.567         |
| 4-Methyl-3-(O-methylbenzyl)pentanenitrile                                             | 43.877          | 29107-40-2  | 0.694         |
| (1-Benzyl-2-O-tolyl-ethyl)-isonitrile                                                 | 44.445          | -           | 0.683         |
| Naphthalene-1,3,3-tricarbonitrile, 3,4,4a,5,6,7-hexahydro-2-amino-4-(4-methylphenyl)- | 49.679          | 163978-39-0 | 0.292         |
| Naphthalene-1,3,3-tricarbonitrile, 3,4,4a,5,6,7-hexahydro-2-amino-4-(4-methylphenyl)- | 50.378          | 163978-39-0 | 0.326         |
| Acridine, 9-phenyl-                                                                   | 51.600          | 602-56-2    | 0.534         |
| <b>Oxygenated Compounds</b>                                                           | <b>Σ(%area)</b> |             | <b>11.583</b> |
| Phenol                                                                                | 12.146          | 108-95-2    | 2.039         |
| Phenol, 2-methyl-                                                                     | 14.630          | 95-48-7     | 0.678         |
| Benzenemethanol, α,α-dimethyl-                                                        | 15.904          | 617-94-7    | 1.43          |
| Phenol, 2,5-dimethyl-                                                                 | 16.580          | 95-87-4     | 0.48          |
| p-Cumenol                                                                             | 20.028          | 99-89-8     | 4.665         |
| Phenol, 2-methyl-5-(1-methylethyl)-                                                   | 22.055          | 499-75-2    | 0.441         |
| Phenol, 2-(1-phenylethyl)-                                                            | 33.240          | 4237-44-9   | 1.332         |
| Benzaldehyde, 2-methyl-, (2,4-dinitrophenyl)hydrazone                                 | 50.781          | 1773-44-0   | 0.518         |
| <b>Non identified fraction</b>                                                        | <b>Σ(%area)</b> |             | <b>0.953</b>  |

**Table S16:** Classes of compounds, summation of peak areas, CAS number, and retention times of chemical compounds identified by GC-MS in bio-oil by catalytic upgrading of WEEE plastic pyrolysis vapors at 450 °C, 1.0 atm, on a fixed catalyst bed loaded with 2.5%.wt of Si-Al ash pellets, Reaction time=30 min, in semi-pilot scale two-stage reactor of 2.0 L.

| Chemical Compound                                         | RT (min)                          | CAS         | wi(%Area)     |
|-----------------------------------------------------------|-----------------------------------|-------------|---------------|
| <b>Aromatic Hydrocarbons</b>                              | <b><math>\Sigma</math>(%area)</b> |             | <b>45.614</b> |
| Styrene                                                   | 9.728                             | 100-42-5    | 5.466         |
| Benzene, (1-methylethyl)-                                 | 10.710                            | 98-82-8     | 3.168         |
| Benzene, propyl-                                          | 11.688                            | 103-65-1    | 0.185         |
| $\alpha$ -Methylstyrene                                   | 12.584                            | 98-83-9     | 6.159         |
| Benzene, 1-propenyl-                                      | 14.092                            | 637-50-3    | 0.556         |
| Indene                                                    | 14.844                            | 95-13-6     | 0.168         |
| Benzene, n-butyl-                                         | 14.998                            | 104-51-8    | 0.131         |
| 2,4-Dimethylstyrene                                       | 16.879                            | 2234-20-0   | 0.170         |
| Biphenyl                                                  | 25.017                            | 92-52-4     | 0.179         |
| Diphenylmethane                                           | 26.329                            | 101-81-5    | 0.624         |
| Benzene, 1,1'-ethyldienebis-                              | 27.764                            | 612-00-0    | 0.571         |
| Bibenzyl                                                  | 28.688                            | 103-29-7    | 0.566         |
| Benzene, 1,1'-(1,3-propanediyl)bis-                       | 32.085                            | 1081-75-0   | 16.178        |
| Benzene, 1,1'-(3-methyl-1-propene-1,3-diyl)bis-           | 32.412                            | 7614-93-9   | 1.712         |
| Benzene, 1,1'-(1-methyl-1,3-propanediyl)bis-              | 32.600                            | 1520-44-1   | 2.120         |
| 1,2-Diphenylcyclopropane                                  | 33.636                            | 29881-14-9  | 2.245         |
| Benzene, 1,1'-(1,4-butanediyl)bis-                        | 34.021                            | 1083-56-3   | 0.653         |
| Benzene, 1,1'-(3-methyl-1-propene-1,3-diyl)bis-           | 34.386                            | 7614-93-9   | 0.957         |
| Benzene, 1,1'-(2-methyl-1-propenyldiene)bis-              | 34.898                            | 781-33-9    | 1.961         |
| 1-(4-Methylphenyl)-4-phenylbuta-1,3-diene                 | 36.410                            | 37985-11-8  | 0.533         |
| Benzene, 1,1'-[3-(2-phenylethylidene)-1,5-pentanediy]bis- | 44.682                            | 55334-57-1  | 0.611         |
| 1-Propene, 3-(2-cyclopentenyl)-2-methyl-1,1-diphenyl-     | 49.302                            | -           | 0.252         |
| 1-Propene, 3-(2-cyclopentenyl)-2-methyl-1,1-diphenyl-     | 53.449                            | -           | 0.449         |
| <b>Polycyclic aromatic hydrocarbons (PAH)</b>             | <b><math>\Sigma</math>(%area)</b> |             | <b>6.445</b>  |
| Naphthalene                                               | 19.491                            | 91-20-3     | 0.586         |
| Naphthalene, 1-methyl-                                    | 22.770                            | 90-12-0     | 0.354         |
| Naphthalene, 2-methyl-                                    | 23.259                            | 91-57-6     | 0.576         |
| Naphthalene, 1-isocyano-                                  | 28.187                            | 09/04/1984  | 0.980         |
| Naphthalene, 1,2,3,4-tetrahydro-1-phenyl-                 | 34.473                            | 3018-20-0   | 0.531         |
| Naphthalene, 1-phenyl-                                    | 36.578                            | 605-02-7    | 1.562         |
| Naphthalene, 2-phenyl-                                    | 40.019                            | 612-94-2    | 0.882         |
| 1,2,3,4-Tetrahydro-1-phenyl-1,2,3-methanonaphthalene      | 40.387                            | 138089-69-7 | 0.263         |
| Naphthalene, 2-(phenylmethyl)-                            | 44.292                            | 613-59-2    | 0.711         |
| <b>Nitrogenated Compounds</b>                             | <b><math>\Sigma</math>(%area)</b> |             | <b>27.135</b> |
| Cyclopentanecarbonitrile, 2-imino-                        | 15.262                            | 2321-76-8   | 0.268         |
| Benzyl nitrile                                            | 17.566                            | 140-29-4    | 0.454         |
| Benzeneacetonitrile, $\alpha$ -methyl-                    | 18.434                            | 1823-91-2   | 0.780         |

|                                                              |                                    |            |               |
|--------------------------------------------------------------|------------------------------------|------------|---------------|
| Benzenepropanenitrile                                        | 20.642                             | 645-59-0   | 0.299         |
| 1,2-Benzenedicarbonitrile                                    | 21.230                             | 91-15-6    | 0.480         |
| Cyclopropanecarbonitrile, 2-phenyl-, trans-                  | 22.408                             | 5590-14-7  | 0.375         |
| Benzenebutanenitrile                                         | 23.461                             | 2046-18-6  | 16.965        |
| Cyclopropanecarbonitrile, 2-phenyl-, cis                     | 23.922                             | 5590-14-7  | 0.297         |
| quinoline, 1,2-dihydro-1-methyl-2-methylene-                 | 24.133                             |            | 0.930         |
| 3-Benzyl-4,5-dihydro-3H-pyrrole                              | 24.347                             | -          | 2.320         |
| 1,2,3,3a-Tetrahydropentalene, 1,1-dimethyl-3-cyanomethylene- | 24.851                             | -          | 0.348         |
| Cyclopropanecarbonitrile, 2-phenyl-, trans-                  | 25.772                             | 5590-14-7  | 0.333         |
| 1H-Pyrrole, 1-(4-methylphenyl)-                              | 26.122                             | 827-60-1   | 0.414         |
| Quinoline, 4-ethyl-                                          | 27.451                             | 19020-26-9 | 0.570         |
| 1,2,3,3a-Tetrahydropentalene, 1,1-dimethyl-3-cyanomethylene- | 27.611                             |            | 0.282         |
| Naphthalene, 1-isocyano-                                     | 28.899                             | 09/04/1984 | 0.397         |
| 1-Naphthaleneacetonitrile                                    | 32.306                             | 132-75-2   | 0.779         |
| Octadecanenitrile                                            | 43.043                             | 638-65-3   | 0.414         |
| 4-Methyl-3-(O-methylbenzyl)pentanenitrile                    | 43.877                             | 29107-40-2 | 0.218         |
| (1-Benzyl-2-O-tolyl-ethyl)-isonitrile                        | 44.445                             | -          | 0.212         |
| <b>Brominated Compounds</b>                                  | <b><math>\Sigma</math>(%.area)</b> |            | <b>1.077</b>  |
| Phenol, 2-bromo-                                             | 15.591                             | 95-56-7    | 0.465         |
| 5-Bromo-2-methoxy-1,3-dimethylbenzene                        | 23.559                             | -          | 0.612         |
| <b>Oxygenated Compounds</b>                                  | <b><math>\Sigma</math>(%.area)</b> |            | <b>16.916</b> |
| Phenol                                                       | 12.146                             | 108-95-2   | 4.502         |
| Phenol, 2-methyl-                                            | 14.630                             | 95-48-7    | 0.503         |
| Benzenemethanol, $\alpha$ -methyl-, (R)-                     | 15.082                             | 1517-69-7  | 0.297         |
| Acetophenone                                                 | 15.361                             | 98-86-2    | 0.296         |
| Benzenemethanol, $\alpha,\alpha$ -dimethyl-                  | 15.904                             | 617-94-7   | 1.604         |
| Phenol, 2,5-dimethyl-                                        | 16.580                             | 95-87-4    | 0.479         |
| Phenol, 2,4-dimethyl-                                        | 17.684                             | 105-67-9   | 0.365         |
| Phenol, 2,4,6-trimethyl-                                     | 18.614                             | 527-60-6   | 0.325         |
| p-Cumenol                                                    | 20.028                             | 99-89-8    | 7.351         |
| Phenol, 2-methyl-5-(1-methylethyl)-                          | 22.055                             | 499-75-2   | 0.348         |
| Phenol, 2-(1-phenylethyl)-                                   | 33.240                             | 4237-44-9  | 0.846         |
| <b>Non identified fraction</b>                               | <b><math>\Sigma</math>(%.area)</b> |            | <b>2.809</b>  |

**Table S17:** Classes of compounds, summation of peak areas, CAS number, and retention times of chemical compounds identified by GC-MS in bio-oil by catalytic upgrading of WEEE plastic pyrolysis vapors at 450 °C, 1.0 atm, on a fixed catalyst bed loaded with 2.5%.wt of Si-Al ash pellets, Reaction time=45 min, in semi-pilot scale two-stage reactor of 2.0 L.

| Chemical Compound                                         | RT (min)                           | CAS         | wi(%Area)     |
|-----------------------------------------------------------|------------------------------------|-------------|---------------|
| <b>Aromatic Hydrocarbons</b>                              | <b><math>\Sigma</math>(%.area)</b> |             | <b>47.840</b> |
| Styrene                                                   | 9.728                              | 100-42-5    | 5.756         |
| Benzene, (1-methylethyl)-                                 | 10.710                             | 98-82-8     | 3.077         |
| Benzene, propyl-                                          | 11.688                             | 103-65-1    | 0.175         |
| $\alpha$ -Methylstyrene                                   | 12.584                             | 98-83-9     | 4.292         |
| Benzene, 1-propenyl-                                      | 14.092                             | 637-50-3    | 0.414         |
| Indene                                                    | 14.844                             | 95-13-6     | 0.164         |
| 2,4-Dimethylstyrene                                       | 16.879                             | 2234-20-0   | 0.143         |
| Biphenyl                                                  | 25.017                             | 92-52-4     | 0.159         |
| Diphenylmethane                                           | 26.329                             | 101-81-5    | 0.684         |
| Benzene, 1,1'-ethylidenebis-                              | 27.764                             | 612-00-0    | 0.569         |
| Bibenzyl                                                  | 28.688                             | 103-29-7    | 0.568         |
| Benzene, 1,1'-(1,3-propanediyl)bis-                       | 32.085                             | 1081-75-0   | 14.522        |
| Benzene, 1,1'-(3-methyl-1-propene-1,3-diyl)bis-           | 32.412                             | 7614-93-9   | 1.806         |
| Benzene, 1,1'-(1-methyl-1,3-propanediyl)bis-              | 32.600                             | 1520-44-1   | 2.096         |
| 1,2-Diphenylcyclopropane                                  | 33.636                             | 29881-14-9  | 2.944         |
| Benzene, 1,1'-(1,4-butanediyl)bis-                        | 34.021                             | 1083-56-3   | 0.770         |
| Benzene, 1,1'-(3-methyl-1-propene-1,3-diyl)bis-           | 34.386                             | 7614-93-9   | 1.237         |
| Benzene, 1,1'-(2-methyl-1-propenylidene)bis-              | 34.898                             | 781-33-9    | 2.437         |
| 1-(4-Methylphenyl)-4-phenylbuta-1,3-diene                 | 36.410                             | 37985-11-8  | 0.807         |
| Benzene, 1,1'-[3-(2-phenylethylidene)-1,5-pentanediy]bis- | 44.682                             | 55334-57-1  | 1.871         |
| Benzene, (1-methylhexadecyl)-                             | 45.090                             | 55125-25-2  | 0.490         |
| p-Terphenyl                                               | 45.435                             | 92-94-4     | 0.304         |
| 1-Propene, 3-(2-cyclopentenyl)-2-methyl-1,1-diphenyl-     | 46.879                             |             | 0.173         |
| 1-Propene, 3-(2-cyclopentenyl)-2-methyl-1,1-diphenyl-     | 49.302                             | -           | 0.732         |
| 1-Propene, 3-(2-cyclopentenyl)-2-methyl-1,1-diphenyl-     | 53.449                             | -           | 1.650         |
| <b>Polycyclic aromatic hydrocarbons (PAH)</b>             | <b><math>\Sigma</math>(%.area)</b> |             | <b>10.010</b> |
| Naphthalene                                               | 19.491                             | 91-20-3     | 0.580         |
| Naphthalene, 1-methyl-                                    | 22.770                             | 90-12-0     | 0.352         |
| Naphthalene, 2-methyl-                                    | 23.259                             | 91-57-6     | 0.614         |
| Naphthalene, 1,2,3,4-tetrahydro-1-phenyl-                 | 34.473                             | 3018-20-0   | 0.733         |
| Naphthalene, 1-phenyl-                                    | 36.578                             | 605-02-7    | 2.568         |
| Naphthalene, 2-phenyl-                                    | 40.019                             | 612-94-2    | 2.376         |
| 1,2,3,4-Tetrahydro-1-phenyl-1,2,3-methanonaphthalene      | 40.387                             | 138089-69-7 | 0.535         |
| Naphthalene, 2-(phenylmethyl)-                            | 44.292                             | 613-59-2    | 2.252         |
| <b>Nitrogenated Compounds</b>                             | <b><math>\Sigma</math>(%.area)</b> |             | <b>27.253</b> |
| Benzyl nitrile                                            | 17.566                             | 140-29-4    | 0.296         |
| Benzeneacetonitrile, $\alpha$ -methyl-                    | 18.434                             | 1823-91-2   | 0.557         |



|                                                                                      |                                    |             |               |
|--------------------------------------------------------------------------------------|------------------------------------|-------------|---------------|
| Benzenepropanenitrile                                                                | 20.642                             | 645-59-0    | 0.306         |
| 1,2-Benzenedicarbonitrile                                                            | 21.230                             | 91-15-6     | 0.357         |
| Cyclopropanecarbonitrile, 2-phenyl-, trans-                                          | 22.408                             | 5590-14-7   | 0.316         |
| Benzenebutanenitrile                                                                 | 23.461                             | 2046-18-6   | 13.649        |
| Cyclopropanecarbonitrile, 2-phenyl-, cis                                             | 23.922                             | 5590-14-7   | 0.203         |
| quinoline, 1,2-dihydro-1-methyl-2-methylene-                                         | 24.133                             |             | 0.815         |
| 3-Benzyl-4,5-dihydro-3H-pyrrole                                                      | 24.347                             | -           | 2.000         |
| 1,2,3,3a-Tetrahydropentalene, 1,1-dimethyl-3-cyanomethylene-                         | 24.851                             | -           | 0.245         |
| Cyclopropanecarbonitrile, 2-phenyl-, trans-                                          | 25.772                             | 5590-14-7   | 0.353         |
| 1H-Pyrrole, 1-(4-methylphenyl)-                                                      | 26.122                             | 827-60-1    | 0.417         |
| Quinoline, 4-ethyl-                                                                  | 27.451                             | 19020-26-9  | 0.487         |
| 1,2,3,3a-Tetrahydropentalene, 1,1-dimethyl-3-cyanomethylene-                         | 27.611                             |             | 0.238         |
| Naphthalene, 1-isocyano-                                                             | 28.187                             | 09/04/1984  | 1.176         |
| Naphthalene, 1-isocyano-                                                             | 28.899                             | 09/04/1984  | 0.626         |
| 1-Naphthaleneacetoneitrile                                                           | 32.306                             | 132-75-2    | 1.290         |
| N-(2-Phenylethyl)-cis-2,3-epoxynona-6,8-dynamide                                     | 34.585                             | 96917-25-8  | 0.398         |
| Octadecanenitrile                                                                    | 43.043                             | 638-65-3    | 0.888         |
| 4-Methyl-3-(O-methylbenzyl)pentanenitrile                                            | 43.877                             | 29107-40-2  | 0.760         |
| (1-Benzyl-2-O-tolyl-ethyl)-isonitrile                                                | 44.445                             | -           | 0.797         |
| Naphthalene-1,3,3-tricarbonitrile, 3,4,4a,5,6,7-hexahdro-2-amino-4-(4-methylphenyl)- | 49.680                             | 163978-39-0 | 0.335         |
| Naphthalene-1,3,3-tricarbonitrile, 3,4,4a,5,6,7-hexahdro-2-amino-4-(4-methylphenyl)- | 50.371                             | 163978-39-0 | 0.356         |
| Acridine, 9-phenyl-                                                                  | 51.607                             | 602-56-2    | 0.388         |
| <b>Brominated Compounds</b>                                                          | <b><math>\Sigma</math>(%.area)</b> |             | <b>0.431</b>  |
| Phenol, 2-bromo-                                                                     | 15.591                             | 95-56-7     | 0.169         |
| 5-Bromo-2-methoxy-1,3-dimethylbenzene                                                | 23.559                             | -           | 0.262         |
| <b>Oxygenated Compounds</b>                                                          | <b><math>\Sigma</math>(%.area)</b> |             | <b>12.023</b> |
| Phenol                                                                               | 12.146                             | 108-95-2    | 2.776         |
| Phenol, 2-methyl-                                                                    | 14.630                             | 95-48-7     | 0.439         |
| Benzenemethanol, $\alpha,\alpha$ -dimethyl-                                          | 15.904                             | 617-94-7    | 0.945         |
| Phenol, 2,5-dimethyl-                                                                | 16.580                             | 95-87-4     | 0.298         |
| Phenol, 2,4-dimethyl-                                                                | 17.684                             | 105-67-9    | 0.235         |
| Phenol, 2,4,6-trimethyl-                                                             | 18.614                             | 527-60-6    | 0.170         |
| p-Cumenol                                                                            | 20.028                             | 99-89-8     | 5.085         |
| Phenol, 2-methyl-5-(1-methylethyl)-                                                  | 22.055                             | 499-75-2    | 0.251         |
| Phenol, 2-(1-phenylethyl)-                                                           | 33.240                             | 4237-44-9   | 0.492         |
| 2,3-Dimethyl-1,4,4a,9a-tetrahydroanthracene-9,10-dione                               | 37.227                             | 2670-23-7   | 0.274         |
| As-Indacen-1(2H)-one, 3,6,7,8-tetrahydro-3,3,6,6-tetramethyl-                        | 45.611                             | 55591-18-9  | 0.424         |
| Benzaldehyde, 2-methyl-, (2,4-dinitrophenyl)hydrazone                                | 50.779                             | 1773-44-0   | 0.634         |
| <b>Non identified fraction</b>                                                       | <b><math>\Sigma</math>(%.area)</b> |             | <b>2.436</b>  |

**Table S18:** Classes of compounds, summation of peak areas, CAS number, and retention times of chemical compounds identified by GC-MS in bio-oil by catalytic upgrading of WEEE plastic pyrolysis vapors at 450 °C, 1.0 atm, on a fixed catalyst bed loaded with 2.5%.wt of Si-Al ash pellets, Reaction time=60 min, in semi-pilot scale two-stage reactor of 2.0 L.

| Chemical Compound                                         | RT (min)        | CAS        | wi(%Area)     |
|-----------------------------------------------------------|-----------------|------------|---------------|
| <b>Aromatic Hydrocarbons</b>                              | <b>Σ(%area)</b> |            | <b>45.883</b> |
| Styrene                                                   | 9.728           | 100-42-5   | 8.154         |
| Benzene, (1-methylethyl)-                                 | 10.710          | 98-82-8    | 3.780         |
| Benzene, propyl-                                          | 11.688          | 103-65-1   | 0.233         |
| α-Methylstyrene                                           | 12.584          | 98-83-9    | 4.905         |
| Benzene, 1-propenyl-                                      | 14.092          | 637-50-3   | 0.450         |
| Indene                                                    | 14.844          | 95-13-6    | 0.571         |
| 2,4-Dimethylstyrene                                       | 16.879          | 2234-20-0  | 0.129         |
| Biphenyl                                                  | 25.017          | 92-52-4    | 0.633         |
| Diphenylmethane                                           | 26.329          | 101-81-5   | 0.752         |
| Benzene, 1,1'-ethylidenebis-                              | 27.764          | 612-00-0   | 0.745         |
| 1,1'-Biphenyl, 2-methyl-                                  | 28.049          | 643-58-3   | 0.216         |
| Bibenzyl                                                  | 28.688          | 103-29-7   | 0.473         |
| Benzene, 1,1'-(1,3-propanediyl)bis-                       | 32.085          | 1081-75-0  | 9.005         |
| Benzene, 1,1'-(3-methyl-1-propene-1,3-diyl)bis-           | 32.412          | 7614-93-9  | 1.334         |
| Benzene, 1,1'-(1-methyl-1,3-propanediyl)bis-              | 32.600          | 1520-44-1  | 1.415         |
| 1,2-Diphenylcyclopropane                                  | 33.636          | 29881-14-9 | 2.807         |
| Benzene, 1,1'-(1,4-butanediyl)bis-                        | 34.021          | 1083-56-3  | 0.597         |
| Benzene, 1,1'-(3-methyl-1-propene-1,3-diyl)bis-           | 34.386          | 7614-93-9  | 0.890         |
| Benzene, 1,1'-(2-methyl-1-propenylidene)bis-              | 34.898          | 781-33-9   | 1.615         |
| 1-(4-Methylphenyl)-4-phenylbuta-1,3-diene                 | 36.410          | 37985-11-8 | 0.602         |
| 1H-Indene, 2-phenyl-                                      | 36.866          | 4505-48-0  | 0.669         |
| Benzene, 1,1'-[3-(2-phenylethylidene)-1,5-pentanediy]bis- | 44.682          | 55334-57-1 | 1.930         |
| Benzene, (1-methylhexadecyl)-                             | 45.090          | 55125-25-2 | 0.558         |
| p-Terphenyl                                               | 45.435          | 92-94-4    | 0.475         |
| 1-Propene, 3-(2-cyclopentenyl)-2-methyl-1,1-diphenyl-     | 46.879          |            | 0.316         |
| 1-Propene, 3-(2-cyclopentenyl)-2-methyl-1,1-diphenyl-     | 49.302          | -          | 0.551         |
| 1-Propene, 3-(2-cyclopentenyl)-2-methyl-1,1-diphenyl-     | 53.449          | -          | 0.991         |
| 1,1':3',1''-Terphenyl, 5'-phenyl-                         | 68.104          | 612-71-5   | 1.087         |
| <b>Polycyclic aromatic hydrocarbons (PAH)</b>             | <b>Σ(%area)</b> |            | <b>18.410</b> |
| Naphthalene                                               | 19.491          | 91-20-3    | 1.730         |
| Naphthalene, 1-methyl-                                    | 22.770          | 90-12-0    | 0.848         |
| Naphthalene, 2-methyl-                                    | 23.259          | 91-57-6    | 1.048         |
| Naphthalene, 1-ethyl-                                     | 25.474          | 1127-76-0  | 0.270         |
| Naphthalene, 1,8-dimethyl-                                | 27.180          | 569-41-5   | 0.237         |
| Naphthalene, 1-isocyano-                                  | 28.899          | 09/04/1984 | 1.032         |
| Fluorene                                                  | 30.718          | 86-73-7    | 0.476         |
| Naphthalene, 1,2,3,4-tetrahydro-1-phenyl-                 | 34.473          | 3018-20-0  | 0.813         |

|                                                                                      |                                    |             |               |
|--------------------------------------------------------------------------------------|------------------------------------|-------------|---------------|
| Anthracene                                                                           | 35.143                             | 120-12-7    | 1.307         |
| Naphthalene, 1-phenyl-                                                               | 36.578                             | 605-02-7    | 2.860         |
| Naphthalene, 2-phenyl-                                                               | 40.019                             | 612-94-2    | 4.129         |
| 1,2,3,4-Tetrahydro-1-phenyl-1,2,3-methanonaphthalene                                 | 40.387                             | 138089-69-7 | 0.687         |
| Naphthalene, 2-(phenylmethyl)-                                                       | 44.292                             | 613-59-2    | 2.973         |
| <b>Nitrogenated Compounds</b>                                                        | <b><math>\Sigma</math>(%.area)</b> |             | <b>21.540</b> |
| Benzonitrile                                                                         | 12.685                             | 100-47-0    | 0.217         |
| Benzyl nitrile                                                                       | 17.566                             | 140-29-4    | 0.402         |
| Benzeneacetonitrile, $\alpha$ -methyl-                                               | 18.434                             | 1823-91-2   | 0.661         |
| Benzenepropanenitrile                                                                | 20.642                             | 645-59-0    | 0.252         |
| 1,2-Benzenedicarbonitrile                                                            | 21.230                             | 91-15-6     | 0.408         |
| Cyclopropanecarbonitrile, 2-phenyl-, trans-                                          | 22.408                             | 5590-14-7   | 0.334         |
| Benzenebutanenitrile                                                                 | 23.461                             | 2046-18-6   | 9.121         |
| Cyclopropanecarbonitrile, 2-phenyl-, cis                                             | 23.922                             | 5590-14-7   | 0.165         |
| quinoline, 1,2-dihydro-1-methyl-2-methylene-                                         | 24.133                             |             | 0.652         |
| 3-Benzyl-4,5-dihydro-3H-pyrrole                                                      | 24.347                             | -           | 1.435         |
| 1,2,3,3a-Tetrahydropentalene, 1,1-dimethyl-3-cyanomethylene-                         | 24.851                             | -           | 0.163         |
| Cyclopropanecarbonitrile, 2-phenyl-, trans-                                          | 25.772                             | 5590-14-7   | 0.394         |
| 1H-Pyrrole, 1-(4-methylphenyl)-                                                      | 26.122                             | 827-60-1    | 0.281         |
| Quinoline, 4-ethyl-                                                                  | 27.451                             | 19020-26-9  | 0.346         |
| Naphthalene, 1-isocyano-                                                             | 28.187                             | 09/04/1984  | 1.412         |
| 1-Naphthaleneacetonitrile                                                            | 32.306                             | 132-75-2    | 1.447         |
| N-(2-Phenylethyl)-cis-2,3-epoxynona-6,8-dynamide                                     | 34.585                             | 96917-25-8  | 0.384         |
| Octadecanenitrile                                                                    | 43.043                             | 638-65-3    | 0.664         |
| 4-Methyl-3-(O-methylbenzyl)pentanenitrile                                            | 43.877                             | 29107-40-2  | 0.674         |
| (1-Benzyl-2-O-tolyl-ethyl)-isonitrile                                                | 44.445                             | -           | 0.853         |
| Naphthalene-1,3,3-tricarbonitrile, 3,4,4a,5,6,7-hexahdro-2-amino-4-(4-methylphenyl)- | 49.680                             | 163978-39-0 | 0.309         |
| Naphthalene-1,3,3-tricarbonitrile, 3,4,4a,5,6,7-hexahdro-2-amino-4-(4-methylphenyl)- | 50.371                             | 163978-39-0 | 0.361         |
| Acridine, 9-phenyl-                                                                  | 51.607                             | 602-56-2    | 0.605         |
| <b>Brominated Compounds</b>                                                          | <b><math>\Sigma</math>(%.area)</b> |             | <b>0.141</b>  |
| Phenol, 2-bromo-                                                                     | 15.591                             | 95-56-7     | 0.089         |
| 5-Bromo-2-methoxy-1,3-dimethylbenzene                                                | 23.559                             | -           | 0.052         |
| <b>Oxygenated Compounds</b>                                                          | <b><math>\Sigma</math>(%.area)</b> |             | <b>11.405</b> |
| Phenol                                                                               | 12.146                             | 108-95-2    | 2.834         |
| Phenol, 2-methyl-                                                                    | 14.630                             | 95-48-7     | 0.459         |
| p-Cresol                                                                             | 15.269                             | 106-44-5    | 0.273         |
| Benzenemethanol, $\alpha,\alpha$ -dimethyl-                                          | 15.904                             | 617-94-7    | 1.186         |
| Phenol, 2,5-dimethyl-                                                                | 16.580                             | 95-87-4     | 0.341         |
| Phenol, 2,4-dimethyl-                                                                | 17.684                             | 105-67-9    | 0.261         |
| Phenol, 2,4,6-trimethyl-                                                             | 19.614                             | 527-60-6    | 0.188         |
| p-Cumenol                                                                            | 20.028                             | 99-89-8     | 3.755         |
| Phenol, 2-methyl-5-(1-methylethyl)-                                                  | 22.055                             | 499-75-2    | 0.257         |
| Phenol, 2-(1-phenylethyl)-                                                           | 33.240                             | 4237-44-9   | 1.177         |
| Benzaldehyde, 2-methyl-, (2,4-dinitrophenyl)hydrazone                                | 50.779                             | 1773-44-0   | 0.674         |

|                         |                          |       |
|-------------------------|--------------------------|-------|
| Non identified fraction | $\Sigma(\%.\text{area})$ | 2.620 |
|-------------------------|--------------------------|-------|

**Table S19:** Classes of compounds, summation of peak areas, CAS number, and retention times of chemical compounds identified by GC-MS in bio-oil by catalytic upgrading of WEEE plastic pyrolysis vapors at 450 °C, 1.0 atm, on a fixed catalyst bed loaded with 5.0%.wt of Si-Al ash pellets, Reaction time=15 min, in semi-pilot scale two-stage reactor of 2.0 L.

| Chemical Compound                                         | RT (min)                          | CAS        | wi(%Area)     |
|-----------------------------------------------------------|-----------------------------------|------------|---------------|
| <b>Aromatic Hydrocarbons</b>                              | <b><math>\Sigma</math>(%area)</b> |            | <b>47.465</b> |
| Styrene                                                   | 9.728                             | 100-42-5   | 8.932         |
| Benzene, (1-methylethyl)-                                 | 10.710                            | 98-82-8    | 4.078         |
| Benzene, propyl-                                          | 11.688                            | 103-65-1   | 0.225         |
| $\alpha$ -Methylstyrene                                   | 12.584                            | 98-83-9    | 7.309         |
| Benzene, 1-propenyl-                                      | 14.092                            | 637-50-3   | 0.563         |
| Indene                                                    | 14.844                            | 95-13-6    | 0.388         |
| Biphenyl                                                  | 25.017                            | 92-52-4    | 0.617         |
| Diphenylmethane                                           | 26.329                            | 101-81-5   | 0.666         |
| Benzene, 1,1'-ethylidenebis-                              | 27.764                            | 612-00-0   | 0.669         |
| 1,1'-Biphenyl, 2-methyl-                                  | 28.049                            | 643-58-3   | 0.186         |
| Bibenzyl                                                  | 28.688                            | 103-29-7   | 0.396         |
| Benzene, 1,1'-(1,3-propanediyl)bis-                       | 32.085                            | 1081-75-0  | 9.263         |
| Benzene, 1,1'-(3-methyl-1-propene-1,3-diyl)bis-           | 32.412                            | 7614-93-9  | 1.070         |
| Benzene, 1,1'-(1-methyl-1,3-propanediyl)bis-              | 32.600                            | 1520-44-1  | 1.310         |
| 1,2-Diphenylcyclopropane                                  | 33.636                            | 29881-14-9 | 2.060         |
| Benzene, 1,1'-(1,4-butanediyl)bis-                        | 34.021                            | 1083-56-3  | 0.472         |
| Benzene, 1,1'-(3-methyl-1-propene-1,3-diyl)bis-           | 34.386                            | 7614-93-9  | 0.738         |
| Benzene, 1,1'-(2-methyl-1-propenylidene)bis-              | 34.898                            | 781-33-9   | 1.467         |
| 1-(4-Methylphenyl)-4-phenylbuta-1,3-diene                 | 36.410                            | 37985-11-8 | 0.441         |
| 1H-Indene, 2-phenyl-                                      | 36.866                            | 4505-48-0  | 0.916         |
| Benzene, (1-methylhexadecyl)-                             | 43.882                            | 55125-25-2 | 0.607         |
| Benzene, 1,1'-[3-(2-phenylethylidene)-1,5-pentanediy]bis- | 44.682                            | 55334-57-1 | 1.619         |
| p-Terphenyl                                               | 45.435                            | 92-94-4    | 0.599         |
| 1-Propene, 3-(2-cyclopentenyl)-2-methyl-1,1-diphenyl-     | 49.302                            | -          | 0.513         |
| 1-Propene, 3-(2-cyclopentenyl)-2-methyl-1,1-diphenyl-     | 53.449                            | -          | 1.143         |
| 1,1':3',1''-Terphenyl, 5'-phenyl-                         | 68.116                            | 612-71-5   | 1.218         |
| <b>Polycyclic aromatic hydrocarbons (PAH)</b>             | <b><math>\Sigma</math>(%area)</b> |            | <b>18.127</b> |
| 1,2,3,4,5,8-Hexahydronaphthalene                          | 15.001                            | 36231-13-7 | 0.180         |
| Naphthalene                                               | 19.491                            | 91-20-3    | 1.403         |
| Naphthalene, 1-methyl-                                    | 22.770                            | 90-12-0    | 0.658         |
| Naphthalene, 2-methyl-                                    | 23.259                            | 91-57-6    | 0.841         |
| Naphthalene, 1-ethyl-                                     | 25.474                            | 1127-76-0  | 0.145         |
| Naphthalene, 1,8-dimethyl-                                | 27.180                            | 569-41-5   | 0.136         |
| Fluorene                                                  | 30.718                            | 86-73-7    | 0.489         |
| Naphthalene, 1,2,3,4-tetrahydro-1-phenyl-                 | 34.473                            | 3018-20-0  | 0.743         |
| Anthracene                                                | 35.143                            | 120-12-7   | 1.524         |
| Naphthalene, 1-phenyl-                                    | 36.578                            | 605-02-7   | 2.985         |

|                                                              |                                    |             |               |
|--------------------------------------------------------------|------------------------------------|-------------|---------------|
| Phenanthrene, 1-methyl-                                      | 38.620                             | 832-69-9    | 0.596         |
| Naphthalene, 2-phenyl-                                       | 40.019                             | 612-94-2    | 4.577         |
| 1,2,3,4-Tetrahydro-1-phenyl-1,2,3-methanonaphthalene         | 40.387                             | 138089-69-7 | 0.697         |
| Naphthalene, 2-(phenylmethyl)-                               | 44.292                             | 613-59-2    | 3.153         |
| <b>Nitrogenated Compounds</b>                                | <b><math>\Sigma</math>(%.area)</b> |             | <b>20.083</b> |
| Benzonitrile                                                 | 12.685                             | 100-47-0    | 0.186         |
| Benzyl nitrile                                               | 17.566                             | 140-29-4    | 0.427         |
| Benzeneacetonitrile, $\alpha$ -methyl-                       | 18.434                             | 1823-91-2   | 0.581         |
| Benzenepropanenitrile                                        | 20.642                             | 645-59-0    | 0.231         |
| 1,2-Benzenedicarbonitrile                                    | 21.230                             | 91-15-6     | 0.409         |
| Cyclopropanecarbonitrile, 2-phenyl-, trans-                  | 22.408                             | 5590-14-7   | 0.331         |
| Benzenebutanenitrile                                         | 23.461                             | 2046-18-6   | 9.085         |
| Cyclopropanecarbonitrile, 2-phenyl-, cis                     | 23.922                             | 5590-14-7   | 0.152         |
| quinoline, 1,2-dihydro-1-methyl-2-methylene-                 | 24.133                             |             | 0.554         |
| 3-Benzyl-4,5-dihydro-3H-pyrrole                              | 24.347                             | -           | 1.267         |
| 1,2,3,3a-Tetrahydropentalene, 1,1-dimethyl-3-cyanomethylene- | 24.851                             | -           | 0.144         |
| Cyclopropanecarbonitrile, 2-phenyl-, trans-                  | 25.772                             | 5590-14-7   | 0.243         |
| 1H-Pyrrole, 1-(4-methylphenyl)-                              | 26.122                             | 827-60-1    | 0.246         |
| Quinoline, 4-ethyl-                                          | 27.451                             | 19020-26-9  | 0.276         |
| Naphthalene, 1-isocyano-                                     | 28.187                             | 09/04/1984  | 1.398         |
| Naphthalene, 1-isocyano-                                     | 28.899                             | 09/04/1984  | 1.161         |
| 1-Naphthaleneacetonitrile                                    | 32.306                             | 132-75-2    | 1.351         |
| Octadecanenitrile                                            | 43.052                             | 638-65-3    | 0.541         |
| (1-Benzyl-2-O-tolyl-ethyl)-isonitrile                        | 44.445                             | -           | 0.792         |
| Acridine, 9-phenyl-                                          | 51.605                             | 602-56-2    | 0.708         |
| <b>Brominated Compounds</b>                                  | <b><math>\Sigma</math>(%.area)</b> |             | <b>0.664</b>  |
| Phenol, 2-bromo-                                             | 15.591                             | 95-56-7     | 0.351         |
| 5-Bromo-2-methoxy-1,3-dimethylbenzene                        | 23.559                             | -           | 0.313         |
| <b>Oxygenated Compounds</b>                                  | <b><math>\Sigma</math>(%.area)</b> |             | <b>11.500</b> |
| Phenol                                                       | 12.146                             | 108-95-2    | 3.767         |
| Phenol, 2-methyl-                                            | 14.630                             | 95-48-7     | 0.610         |
| p-Cresol                                                     | 15.269                             | 106-44-5    | 0.366         |
| Benzenemethanol, $\alpha,\alpha$ -dimethyl-                  | 15.909                             | 617-94-7    | 0.220         |
| Phenol, 2,5-dimethyl-                                        | 16.580                             | 95-87-4     | 0.388         |
| Phenol, 2,4-dimethyl-                                        | 17.684                             | 105-67-9    | 0.295         |
| Phenol, 2,4,6-trimethyl-                                     | 19.614                             | 527-60-6    | 0.200         |
| p-Cumenol                                                    | 20.028                             | 99-89-8     | 4.004         |
| Phenol, 2-(1-phenylethyl)-                                   | 33.240                             | 4237-44-9   | 1.024         |
| Benzaldehyde, 2-methyl-, (2,4-dinitrophenyl)hydrazone        | 50.779                             | 1773-44-0   | 0.626         |
| <b>Non identified fraction</b>                               | <b><math>\Sigma</math>(%.area)</b> |             | <b>2.161</b>  |

**Table S20:** Classes of compounds, summation of peak areas, CAS number, and retention times of chemical compounds identified by GC-MS in bio-oil by catalytic upgrading of WEEE plastic pyrolysis vapors at 450 °C, 1.0 atm, on a fixed catalyst bed loaded with 5.0%.wt of Si-Al ash pellets, Reaction time=30 min, in semi-pilot scale two-stage reactor of 2.0 L.

| Chemical Compound                                         | RT (min)                          | CAS         | wi(%Area)     |
|-----------------------------------------------------------|-----------------------------------|-------------|---------------|
| <b>Aromatic Hydrocarbons</b>                              | <b><math>\Sigma</math>(%area)</b> |             | <b>58.465</b> |
| Styrene                                                   | 9.728                             | 100-42-5    | 18.688        |
| Benzene, (1-methylethyl)-                                 | 10.710                            | 98-82-8     | 8.985         |
| Benzene, propyl-                                          | 11.688                            | 103-65-1    | 0.502         |
| $\alpha$ -Methylstyrene                                   | 12.584                            | 98-83-9     | 11.920        |
| Benzene, 1-propenyl-                                      | 14.092                            | 637-50-3    | 0.888         |
| Indene                                                    | 14.844                            | 95-13-6     | 0.334         |
| Biphenyl                                                  | 25.017                            | 92-52-4     | 0.296         |
| Diphenylmethane                                           | 26.329                            | 101-81-5    | 0.553         |
| Benzene, 1,1'-ethylidenebis-                              | 27.764                            | 612-00-0    | 0.450         |
| Bibenzyl                                                  | 28.688                            | 103-29-7    | 0.343         |
| Benzene, 1,1'-(1,3-propanediyl)bis-                       | 32.085                            | 1081-75-0   | 9.166         |
| Benzene, 1,1'-(3-methyl-1-propene-1,3-diyl)bis-           | 32.412                            | 7614-93-9   | 1.009         |
| Benzene, 1,1'-(1-methyl-1,3-propanediyl)bis-              | 32.600                            | 1520-44-1   | 1.224         |
| 1,2-Diphenylcyclopropane                                  | 33.636                            | 29881-14-9  | 1.390         |
| Benzene, 1,1'-(1,4-butanediyl)bis-                        | 34.021                            | 1083-56-3   | 0.371         |
| Benzene, 1,1'-(3-methyl-1-propene-1,3-diyl)bis-           | 34.386                            | 7614-93-9   | 0.511         |
| Benzene, 1,1'-(2-methyl-1-propenylidene)bis-              | 34.898                            | 781-33-9    | 0.990         |
| 1-(4-Methylphenyl)-4-phenylbuta-1,3-diene                 | 36.410                            | 37985-11-8  | 0.173         |
| 1H-Indene, 2-phenyl-                                      | 36.866                            | 4505-48-0   | 0.184         |
| Benzene, 1,1'-[3-(2-phenylethylidene)-1,5-pentanediy]bis- | 44.682                            | 55334-57-1  | 0.488         |
| <b>Polycyclic aromatic hydrocarbons (PAH)</b>             | <b><math>\Sigma</math>(%area)</b> |             | <b>7.207</b>  |
| 1,2,3,4,5,8-Hexahydronaphthalene                          | 15.001                            | 36231-13-7  | 0.279         |
| Naphthalene                                               | 19.491                            | 91-20-3     | 0.861         |
| Naphthalene, 1-methyl-                                    | 22.770                            | 90-12-0     | 0.371         |
| Naphthalene, 2-methyl-                                    | 23.259                            | 91-57-6     | 0.592         |
| Naphthalene, 1,2,3,4-tetrahydro-1-phenyl-                 | 34.473                            | 3018-20-0   | 0.368         |
| Anthracene                                                | 35.143                            | 120-12-7    | 0.475         |
| Naphthalene, 1-phenyl-                                    | 36.578                            | 605-02-7    | 1.313         |
| Naphthalene, 2-phenyl-                                    | 40.019                            | 612-94-2    | 1.629         |
| 1,2,3,4-Tetrahydro-1-phenyl-1,2,3-methanonaphthalene      | 40.387                            | 138089-69-7 | 0.241         |
| Naphthalene, 2-(phenylmethyl)-                            | 44.292                            | 613-59-2    | 1.078         |
| <b>Nitrogenated Compounds</b>                             | <b><math>\Sigma</math>(%area)</b> |             | <b>18.675</b> |
| Benzyl nitrile                                            | 17.566                            | 140-29-4    | 0.430         |
| Benzeneacetonitrile, $\alpha$ -methyl-                    | 18.434                            | 1823-91-2   | 0.735         |
| Benzenepropanenitrile                                     | 20.642                            | 645-59-0    | 0.309         |
| 1,2-Benzenedicarbonitrile                                 | 21.230                            | 91-15-6     | 0.318         |
| Cyclopropanecarbonitrile, 2-phenyl-, trans-               | 22.408                            | 5590-14-7   | 0.294         |

|                                                              |                                     |            |               |
|--------------------------------------------------------------|-------------------------------------|------------|---------------|
| Benzenebutanenitrile                                         | 23.461                              | 2046-18-6  | 11.626        |
| Cyclopropanecarbonitrile, 2-phenyl-, cis                     | 23.922                              | 5590-14-7  | 0.192         |
| quinoline, 1,2-dihydro-1-methyl-2-methylene-                 | 24.133                              |            | 0.613         |
| 3-Benzyl-4,5-dihydro-3H-pyrrole                              | 24.347                              | -          | 1.486         |
| 1,2,3,3a-Tetrahydropentalene, 1,1-dimethyl-3-cyanomethylene- | 24.851                              | -          | 0.224         |
| 1H-Pyrrole, 1-(4-methylphenyl)-                              | 26.122                              | 827-60-1   | 0.265         |
| Quinoline, 4-ethyl-                                          | 27.451                              | 19020-26-9 | 0.196         |
| Naphthalene, 1-isocyano-                                     | 28.187                              | 09/04/1984 | 0.800         |
| Naphthalene, 1-isocyano-                                     | 28.899                              | 09/04/1984 | 0.505         |
| 1-Naphthaleneacetonitrile                                    | 32.306                              | 132-75-2   | 0.682         |
| <b>Brominated Compounds</b>                                  | <b><math>\Sigma(\%.area)</math></b> |            | <b>0.776</b>  |
| Phenol, 2-bromo-                                             | 15.591                              | 95-56-7    | 0.388         |
| 5-Bromo-2-methoxy-1,3-dimethylbenzene                        | 23.559                              | -          | 0.388         |
| <b>Oxygenated Compounds</b>                                  | <b><math>\Sigma(\%.area)</math></b> |            | <b>13.429</b> |
| Phenol                                                       | 12.146                              | 108-95-2   | 4.719         |
| Phenol, 2-methyl-                                            | 14.630                              | 95-48-7    | 0.742         |
| p-Cresol                                                     | 15.269                              | 106-44-5   | 0.362         |
| Phenol, 2,5-dimethyl-                                        | 16.580                              | 95-87-4    | 0.466         |
| Phenol, 2,4-dimethyl-                                        | 17.684                              | 105-67-9   | 0.364         |
| Phenol, 2,4,6-trimethyl-                                     | 19.614                              | 527-60-6   | 0.242         |
| p-Cumenol                                                    | 20.028                              | 99-89-8    | 6.237         |
| Phenol, 2-(1-phenylethyl)-                                   | 33.240                              | 4237-44-9  | 0.297         |
| <b>Non identified fraction</b>                               | <b><math>\Sigma(\%.area)</math></b> |            | <b>1.450</b>  |



**Table S21:** Classes of compounds, summation of peak areas, CAS number, and retention times of chemical compounds identified by GC-MS in bio-oil by catalytic upgrading of WEEE plastic pyrolysis vapors at 450 °C, 1.0 atm, on a fixed catalyst bed loaded with 5.0%.wt of Si-Al ash pellets, Reaction time=45 min, in semi-pilot scale two-stage reactor of 2.0 L.

| Chemical Compound                                         | RT (min)        | CAS         | wi(%Area)     |
|-----------------------------------------------------------|-----------------|-------------|---------------|
| <b>Aromatic Hydrocarbons</b>                              | <b>Σ(%area)</b> |             | <b>46.881</b> |
| Styrene                                                   | 9.728           | 100-42-5    | 6.593         |
| Benzene, (1-methylethyl)-                                 | 10.710          | 98-82-8     | 3.696         |
| Benzene, propyl-                                          | 11.688          | 103-65-1    | 0.232         |
| α-Methylstyrene                                           | 12.584          | 98-83-9     | 4.729         |
| Benzene, 1-propenyl-                                      | 14.092          | 637-50-3    | 0.489         |
| Indene                                                    | 14.844          | 95-13-6     | 0.228         |
| Biphenyl                                                  | 25.017          | 92-52-4     | 0.333         |
| Diphenylmethane                                           | 26.329          | 101-81-5    | 0.678         |
| Benzene, 1,1'-ethylidenebis-                              | 27.764          | 612-00-0    | 0.605         |
| Bibenzyl                                                  | 28.688          | 103-29-7    | 0.589         |
| Benzene, 1,1'-(1,3-propanediyl)bis-                       | 32.085          | 1081-75-0   | 13.455        |
| Benzene, 1,1'-(3-methyl-1-propene-1,3-diyl)bis-           | 32.412          | 7614-93-9   | 1.605         |
| Benzene, 1,1'-(1-methyl-1,3-propanediyl)bis-              | 32.600          | 1520-44-1   | 2.275         |
| 1,2-Diphenylcyclopropane                                  | 33.636          | 29881-14-9  | 2.809         |
| Benzene, 1,1'-(1,4-butanediyl)bis-                        | 34.021          | 1083-56-3   | 0.763         |
| Benzene, 1,1'-(3-methyl-1-propene-1,3-diyl)bis-           | 34.386          | 7614-93-9   | 1.051         |
| Benzene, 1,1'-(2-methyl-1-propenylidene)bis-              | 34.898          | 781-33-9    | 1.965         |
| 1-(4-Methylphenyl)-4-phenylbuta-1,3-diene                 | 36.410          | 37985-11-8  | 0.605         |
| 1H-Indene, 2-phenyl-                                      | 36.866          | 4505-48-0   | 0.234         |
| 3-Methyl-1-phenyl-1H-indene                               | 37.559          | 22360-63-0  | 0.369         |
| Benzene, 1,1'-[3-(2-phenylethylidene)-1,5-pentanedyl]bis- | 44.682          | 55334-57-1  | 1.541         |
| Benzene, (1-methylhexadecyl)-                             | 45.088          | 55125-25-2  | 0.517         |
| p-Terphenyl                                               | 45.435          | 92-94-4     | 0.373         |
| 1,1':4',1''-Terphenyl-, 3'-methyl-                        | 47.282          | 33776-38-4  | 0.378         |
| 1-Propene, 3-(2-cyclopentenyl)-2-methyl-1,1-diphenyl-     | 49.300          |             | 0.283         |
| 1-Propene, 3-(2-cyclopentenyl)-2-methyl-1,1-diphenyl-     | 53.446          |             | 0.486         |
| <b>Polycyclic aromatic hydrocarbons (PAH)</b>             | <b>Σ(%area)</b> |             | <b>11.870</b> |
| Naphthalene                                               | 19.491          | 91-20-3     | 0.805         |
| Naphthalene, 1-methyl-                                    | 22.770          | 90-12-0     | 0.429         |
| Naphthalene, 2-methyl-                                    | 23.259          | 91-57-6     | 0.638         |
| Naphthalene, 1,2,3,4-tetrahydro-1-phenyl-                 | 34.473          | 3018-20-0   | 0.719         |
| Anthracene                                                | 35.143          | 120-12-7    | 0.620         |
| Naphthalene, 1-phenyl-                                    | 36.578          | 605-02-7    | 2.632         |
| Naphthalene, 2-phenyl-                                    | 40.019          | 612-94-2    | 2.993         |
| 1,2,3,4-Tetrahydro-1-phenyl-1,2,3-methanonaphthalene      | 40.387          | 138089-69-7 | 0.594         |
| Naphthalene, 2-(phenylmethyl)-                            | 44.292          | 613-59-2    | 2.440         |
| <b>Nitrogenated Compounds</b>                             | <b>Σ(%area)</b> |             | <b>25.719</b> |

|                                                                                       |                                    |             |               |
|---------------------------------------------------------------------------------------|------------------------------------|-------------|---------------|
| Benzyl nitrile                                                                        | 17.566                             | 140-29-4    | 0.359         |
| Benzeneacetonitrile, $\alpha$ -methyl-                                                | 18.434                             | 1823-91-2   | 0.610         |
| Benzenepropanenitrile                                                                 | 20.642                             | 645-59-0    | 0.338         |
| 1,2-Benzenedicarbonitrile                                                             | 21.230                             | 91-15-6     | 0.442         |
| Cyclopropanecarbonitrile, 2-phenyl-, trans-                                           | 22.408                             | 5590-14-7   | 0.356         |
| Benzenebutanenitrile                                                                  | 23.461                             | 2046-18-6   | 13.133        |
| Cyclopropanecarbonitrile, 2-phenyl-, cis                                              | 23.922                             | 5590-14-7   | 0.241         |
| quinoline, 1,2-dihydro-1-methyl-2-methylene-                                          | 24.133                             |             | 0.876         |
| 3-Benzyl-4,5-dihydro-3H-pyrrole                                                       | 24.347                             | -           | 2.019         |
| 1,2,3,3a-Tetrahydropentalene, 1,1-dimethyl-3-cyanomethylene-                          | 24.851                             | -           | 0.223         |
| Cyclopropanecarbonitrile, 2-phenyl-, trans-                                           | 25.766                             | 5590-14-7   | 0.353         |
| 1H-Pyrrole, 1-(4-methylphenyl)-                                                       | 26.122                             | 827-60-1    | 0.409         |
| Quinoline, 4-ethyl-                                                                   | 27.451                             | 19020-26-9  | 0.383         |
| Naphthalene, 1-isocyano-                                                              | 28.187                             | 09/04/1984  | 1.298         |
| Naphthalene, 1-isocyano-                                                              | 28.899                             | 09/04/1984  | 0.909         |
| 1-Naphthaleneacetonitrile                                                             | 32.306                             | 132-75-2    | 1.391         |
| Octadecanenitrile                                                                     | 43.046                             | 638-65-3    | 0.653         |
| (1-Benzyl-2-O-tolyl-ethyl)-isonitrile                                                 | 44.488                             |             | 0.617         |
| Naphthalene-1,3,3-tricarbonitrile, 3,4,4a,5,6,7-hexahydro-2-amino-4-(4-methylphenyl)- | 49.679                             | 163978-39-0 | 0.375         |
| Naphthalene-1,3,3-tricarbonitrile, 3,4,4a,5,6,7-hexahydro-2-amino-4-(4-methylphenyl)- | 50.372                             | 163978-39-0 | 0.390         |
| Acridine, 9-phenyl-                                                                   | 51.605                             | 602-56-2    | 0.344         |
| <b>Brominated Compounds</b>                                                           | <b><math>\Sigma</math>(%.area)</b> |             | <b>0.246</b>  |
| Phenol, 2-bromo-                                                                      | 15.591                             | 95-56-7     | 0.137         |
| 5-Bromo-2-methoxy-1,3-dimethylbenzene                                                 | 23.559                             | -           | 0.109         |
| <b>Oxygenated Compounds</b>                                                           | <b><math>\Sigma</math>(%.area)</b> |             | <b>13.074</b> |
| Phenol                                                                                | 12.146                             | 108-95-2    | 3.171         |
| Phenol, 2-methyl-                                                                     | 14.630                             | 95-48-7     | 0.527         |
| p-Cresol                                                                              | 15.269                             | 106-44-5    | 0.225         |
| Benzenemethanol, $\alpha,\alpha$ -dimethyl-                                           | 15.905                             | 617-94-7    | 1.216         |
| Phenol, 2,5-dimethyl-                                                                 | 16.580                             | 95-87-4     | 0.361         |
| Phenol, 2,4-dimethyl-                                                                 | 17.684                             | 105-67-9    | 0.284         |
| Phenol, 2,4,6-trimethyl-                                                              | 19.614                             | 527-60-6    | 0.230         |
| p-Cumenol                                                                             | 20.028                             | 99-89-8     | 5.620         |
| Phenol, 2-methyl-5-(1-methylethyl)-                                                   | 22.055                             | 499-75-2    | 0.250         |
| Phenol, 2-(1-phenylethyl)-                                                            | 33.240                             | 4237-44-9   | 0.617         |
| Benzaldehyde, 2-methyl-, (2,4-dinitrophenyl)hydrazone                                 | 50.779                             | 1773-44-0   | 0.573         |
| <b>Non identified fraction</b>                                                        | <b><math>\Sigma</math>(%.area)</b> |             | <b>2.211</b>  |

**Table S22:** Classes of compounds, summation of peak areas, CAS number, and retention times of chemical compounds identified by GC-MS in bio-oil by catalytic upgrading of WEEE plastic pyrolysis vapors at 450 °C, 1.0 atm, on a fixed catalyst bed loaded with 5.0%.wt of Si-Al ash pellets, Reaction time=60 min, in semi-pilot scale two-stage reactor of 2.0 L.

| Chemical Compound                                         | RT (min)        | CAS        | wi(%Area)     |
|-----------------------------------------------------------|-----------------|------------|---------------|
| <b>Aromatic Hydrocarbons</b>                              | <b>Σ(%area)</b> |            | <b>44.566</b> |
| Styrene                                                   | 9.728           | 100-42-5   | 6.443         |
| Benzene, (1-methylethyl)-                                 | 10.710          | 98-82-8    | 3.346         |
| Benzene, propyl-                                          | 11.688          | 103-65-1   | 0.221         |
| α-Methylstyrene                                           | 12.584          | 98-83-9    | 4.982         |
| Benzene, 1-propenyl-                                      | 14.092          | 637-50-3   | 0.487         |
| Indene                                                    | 14.844          | 95-13-6    | 0.514         |
| Biphenyl                                                  | 25.017          | 92-52-4    | 0.539         |
| Diphenylmethane                                           | 26.329          | 101-81-5   | 0.716         |
| Benzene, 1,1'-ethylidenebis-                              | 27.764          | 612-00-0   | 0.728         |
| 1,1'-Biphenyl, 2-methyl-                                  | 28.047          | 643-58-3   | 0.167         |
| Bibenzyl                                                  | 28.688          | 103-29-7   | 0.499         |
| Benzene, 1,1'-(1,3-propanediyl)bis-                       | 32.085          | 1081-75-0  | 8.736         |
| Benzene, 1,1'-(3-methyl-1-propene-1,3-diyl)bis-           | 32.412          | 7614-93-9  | 1.103         |
| Benzene, 1,1'-(1-methyl-1,3-propanediyl)bis-              | 32.600          | 1520-44-1  | 1.516         |
| 1,2-Diphenylcyclopropane                                  | 33.636          | 29881-14-9 | 2.628         |
| Benzene, 1,1'-(1,4-butanediyl)bis-                        | 34.021          | 1083-56-3  | 0.596         |
| Benzene, 1,1'-(3-methyl-1-propene-1,3-diyl)bis-           | 34.386          | 7614-93-9  | 0.754         |
| Benzene, 1,1'-(2-methyl-1-propenylidene)bis-              | 34.898          | 781-33-9   | 1.508         |
| 1-(4-Methylphenyl)-4-phenylbuta-1,3-diene                 | 36.410          | 37985-11-8 | 0.602         |
| 1H-Indene, 2-phenyl-                                      | 36.866          | 4505-48-0  | 0.600         |
| 3-Methyl-1-phenyl-1H-indene                               | 37.559          | 22360-63-0 | 0.547         |
| Benzene, 1,1'-[3-(2-phenylethylidene)-1,5-pentanediy]bis- | 44.682          | 55334-57-1 | 2.303         |
| Benzene, (1-methylhexadecyl)-                             | 45.088          | 55125-25-2 | 0.764         |
| p-Terphenyl                                               | 45.435          | 92-94-4    | 0.632         |
| 1,1':4',1''-Terphenyl-, 3'-methyl-                        | 47.282          | 33776-38-4 | 0.540         |
| 1-Propene, 3-(2-cyclopentenyl)-2-methyl-1,1-diphenyl-     | 49.300          |            | 0.240         |
| 1-Propene, 3-(2-cyclopentenyl)-2-methyl-1,1-diphenyl-     | 53.446          |            | 0.496         |
| 1,1':2',1''-Terphenyl, 4'-phenyl-                         | 57.602          | 1165-53-3  | 0.398         |
| 1,1':3',1''-Terphenyl, 5'-phenyl-                         | 68.104          | 612-71-5   | 1.961         |
| <b>Polycyclic aromatic hydrocarbons (PAH)</b>             | <b>Σ(%area)</b> |            | <b>17.485</b> |
| Naphthalene                                               | 19.491          | 91-20-3    | 1.389         |
| Naphthalene, 1-methyl-                                    | 22.770          | 90-12-0    | 0.594         |
| Naphthalene, 2-methyl-                                    | 23.259          | 91-57-6    | 0.954         |
| Naphthalene, 1,2,3,4-tetrahydro-1-phenyl-                 | 34.473          | 3018-20-0  | 0.881         |
| Anthracene                                                | 35.143          | 120-12-7   | 0.974         |
| Naphthalene, 1-phenyl-                                    | 36.578          | 605-02-7   | 3.175         |
| Naphthalene, 2-phenyl-                                    | 40.019          | 612-94-2   | 4.835         |

|                                                                                      |                                    |             |               |
|--------------------------------------------------------------------------------------|------------------------------------|-------------|---------------|
| 1,2,3,4-Tetrahydro-1-phenyl-1,2,3-methanonaphthalene                                 | 40.387                             | 138089-69-7 | 0.823         |
| Naphthalene, 2-(phenylmethyl)-                                                       | 44.292                             | 613-59-2    | 3.860         |
| <b>Nitrogenated Compounds</b>                                                        | <b><math>\Sigma</math>(%.area)</b> |             | <b>22.946</b> |
| Benzonitrile                                                                         | 12.685                             | 100-47-0    | 0.203         |
| Benzyl nitrile                                                                       | 17.566                             | 140-29-4    | 0.449         |
| Benzeneacetonitrile, $\alpha$ -methyl-                                               | 18.434                             | 1823-91-2   | 0.640         |
| Benzenepropanenitrile                                                                | 20.642                             | 645-59-0    | 0.306         |
| 1,2-Benzenedicarbonitrile                                                            | 21.230                             | 91-15-6     | 0.540         |
| Cyclopropanecarbonitrile, 2-phenyl-, trans-                                          | 22.408                             | 5590-14-7   | 0.331         |
| Benzenebutanenitrile                                                                 | 23.461                             | 2046-18-6   | 8.627         |
| Cyclopropanecarbonitrile, 2-phenyl-, cis                                             | 23.922                             | 5590-14-7   | 0.188         |
| quinoline, 1,2-dihydro-1-methyl-2-methylene-                                         | 24.133                             |             | 0.685         |
| 3-Benzyl-4,5-dihydro-3H-pyrrole                                                      | 24.347                             | -           | 1.430         |
| 1,2,3,3a-Tetrahydropentalene, 1,1-dimethyl-3-cyanomethylene-                         | 24.851                             | -           | 0.104         |
| Cyclopropanecarbonitrile, 2-phenyl-, trans-                                          | 25.766                             | 5590-14-7   | 0.311         |
| 1H-Pyrrole, 1-(4-methylphenyl)-                                                      | 26.122                             | 827-60-1    | 0.270         |
| Quinoline, 4-ethyl-                                                                  | 27.451                             | 19020-26-9  | 0.278         |
| Naphthalene, 1-isocyano-                                                             | 28.187                             | 09/04/1984  | 1.601         |
| Naphthalene, 1-isocyano-                                                             | 28.899                             | 09/04/1984  | 1.418         |
| 1-Naphthaleneacetonitrile                                                            | 32.306                             | 132-75-2    | 1.696         |
| Octadecanenitrile                                                                    | 43.046                             | 638-65-3    | 0.618         |
| (1-Benzyl-2-O-tolyl-ethyl)-isonitrile                                                | 44.488                             |             | 1.017         |
| Naphthalene-1,3,3-tricarbonitrile, 3,4,4a,5,6,7-hexahdro-2-amino-4-(4-methylphenyl)- | 49.679                             | 163978-39-0 | 0.585         |
| Naphthalene-1,3,3-tricarbonitrile, 3,4,4a,5,6,7-hexahdro-2-amino-4-(4-methylphenyl)- | 50.372                             | 163978-39-0 | 0.627         |
| Acridine, 9-phenyl-                                                                  | 51.605                             | 602-56-2    | 1.022         |
| <b>Brominated Compounds</b>                                                          | <b><math>\Sigma</math>(%.area)</b> |             | <b>0.023</b>  |
| 5-Bromo-2-methoxy-1,3-dimethylbenzene                                                | 23.559                             | -           | 0.023         |
| <b>Oxygenated Compounds</b>                                                          | <b><math>\Sigma</math>(%.area)</b> |             | <b>11.145</b> |
| Phenol                                                                               | 12.146                             | 108-95-2    | 3.351         |
| Phenol, 2-methyl-                                                                    | 14.630                             | 95-48-7     | 0.595         |
| p-Cresol                                                                             | 15.269                             | 106-44-5    | 0.323         |
| Benzenemethanol, $\alpha,\alpha$ -dimethyl-                                          | 15.905                             | 617-94-7    | 0.366         |
| Phenol, 2,5-dimethyl-                                                                | 16.580                             | 95-87-4     | 0.416         |
| Phenol, 2,4-dimethyl-                                                                | 17.684                             | 105-67-9    | 0.334         |
| Phenol, 2,4,6-trimethyl-                                                             | 19.614                             | 527-60-6    | 0.216         |
| p-Cumenol                                                                            | 20.028                             | 99-89-8     | 3.516         |
| Phenol, 2-methyl-5-(1-methylethyl)-                                                  | 22.055                             | 499-75-2    | 0.235         |
| Phenol, 2-(1-phenylethyl)-                                                           | 33.240                             | 4237-44-9   | 0.506         |
| Benzaldehyde, 2-methyl-, (2,4-dinitrophenyl)hydrazone                                | 50.779                             | 1773-44-0   | 1.287         |
| <b>Non identified fraction</b>                                                       | <b><math>\Sigma</math>(%.area)</b> |             | <b>3.838</b>  |

**Table S23:** Classes of compounds, summation of peak areas, CAS number, and retention times of chemical compounds identified by GC-MS in bio-oil by catalytic upgrading of WEEE plastic pyrolysis vapors at 450 °C, 1.0 atm, on a fixed catalyst bed loaded with 7.5%.wt of Si-Al ash pellets, Reaction time=15 min, in semi-pilot scale two-stage reactor of 2.0 L.

| Chemical Compound                                            | RT (min)        | CAS        | wi(%Area)     |
|--------------------------------------------------------------|-----------------|------------|---------------|
| <b>Aromatic Hydrocarbons</b>                                 | <b>Σ(%area)</b> |            | <b>48.384</b> |
| Styrene                                                      | 9.728           | 100-42-5   | 7.386         |
| Benzene, (1-methylethyl)-                                    | 10.710          | 98-82-8    | 5.087         |
| Benzene, propyl-                                             | 11.688          | 103-65-1   | 0.489         |
| α-Methylstyrene                                              | 12.584          | 98-83-9    | 7.406         |
| Benzene, 1-propenyl-                                         | 14.092          | 637-50-3   | 0.681         |
| Indene                                                       | 14.844          | 95-13-6    | 0.393         |
| Diphenylmethane                                              | 26.329          | 101-81-5   | 0.660         |
| Benzene, 1,1'-ethylidenebis-                                 | 27.764          | 612-00-0   | 0.250         |
| Bibenzyl                                                     | 28.688          | 103-29-7   | 0.330         |
| Benzene, 1,1'-(1,3-propanediyl)bis-                          | 32.085          | 1081-75-0  | 15.841        |
| Benzene, 1,1'-(3-methyl-1-propene-1,3-diyl)bis-              | 32.412          | 7614-93-9  | 2.500         |
| Benzene, 1,1'-(1-methyl-1,3-propanediyl)bis-                 | 32.600          | 1520-44-1  | 1.721         |
| 1,2-Diphenylcyclopropane                                     | 33.636          | 29881-14-9 | 1.726         |
| Benzene, 1,1'-(1,4-butanediyl)bis-                           | 34.021          | 1083-56-3  | 0.616         |
| Benzene, 1,1'-(3-methyl-1-propene-1,3-diyl)bis-              | 34.386          | 7614-93-9  | 1.144         |
| Benzene, 1,1'-(2-methyl-1-propenylidene)bis-                 | 34.898          | 781-33-9   | 1.750         |
| 1-(4-Methylphenyl)-4-phenylbuta-1,3-diene                    | 36.410          | 37985-11-8 | 0.404         |
| <b>Polycyclic aromatic hydrocarbons (PAH)</b>                | <b>Σ(%area)</b> |            | <b>5.168</b>  |
| Naphthalene                                                  | 19.491          | 91-20-3    | 0.472         |
| Naphthalene, 1-methyl-                                       | 22.770          | 90-12-0    | 0.261         |
| Naphthalene, 2-methyl-                                       | 23.259          | 91-57-6    | 0.337         |
| Naphthalene, 1,2,3,4-tetrahydro-1-phenyl-                    | 34.473          | 3018-20-0  | 0.390         |
| Naphthalene, 1-phenyl-                                       | 36.578          | 605-02-7   | 3.031         |
| Naphthalene, 2-(phenylmethyl)-                               | 44.292          | 613-59-2   | 0.677         |
| <b>Nitrogenated Compounds</b>                                | <b>Σ(%area)</b> |            | <b>23.069</b> |
| Benzyl nitrile                                               | 17.566          | 140-29-4   | 0.429         |
| Benzeneacetonitrile, α-methyl-                               | 18.434          | 1823-91-2  | 0.827         |
| Benzenepropanenitrile                                        | 20.642          | 645-59-0   | 0.335         |
| Cyclopropanecarbonitrile, 2-phenyl-, trans-                  | 22.408          | 5590-14-7  | 0.244         |
| Benzenebutanenitrile                                         | 23.461          | 2046-18-6  | 14.906        |
| quinoline, 1,2-dihydro-1-methyl-2-methylene-                 | 24.133          |            | 0.822         |
| 3-Benzyl-4,5-dihydro-3H-pyrrole                              | 24.347          | -          | 1.531         |
| 1,2,3,3a-Tetrahydropentalene, 1,1-dimethyl-3-cyanomethylene- | 24.851          | -          | 1.662         |
| 1H-Pyrrole, 1-(4-methylphenyl)-                              | 26.122          | 827-60-1   | 0.384         |
| Naphthalene, 1-isocyano-                                     | 28.187          | 09/04/1984 | 0.514         |
| 1-Naphthaleneacetonitrile                                    | 32.306          | 132-75-2   | 0.834         |
| Octadecanenitrile                                            | 43.046          | 638-65-3   | 0.581         |

|                                             |                                    |           |               |
|---------------------------------------------|------------------------------------|-----------|---------------|
| <b>Brominated Compounds</b>                 | <b><math>\Sigma</math>(%.area)</b> |           | <b>0.996</b>  |
| Phenol, 2-bromo-                            | 15.591                             | 95-56-7   | 0.520         |
| 5-Bromo-2-methoxy-1,3-dimethylbenzene       | 23.559                             | -         | 0.476         |
| <b>Oxygenated Compounds</b>                 | <b><math>\Sigma</math>(%.area)</b> |           | <b>19.591</b> |
| Phenol                                      | 12.146                             | 108-95-2  | 6.047         |
| Phenol, 2-methyl-                           | 14.630                             | 95-48-7   | 0.903         |
| Benzenemethanol, $\alpha$ -methyl-, (R)-    | 15.084                             | 1517-69-7 | 0.364         |
| p-Cresol                                    | 15.269                             | 106-44-5  | 0.335         |
| Benzenemethanol, $\alpha,\alpha$ -dimethyl- | 15.905                             | 617-94-7  | 3.565         |
| Phenol, 2,5-dimethyl-                       | 16.580                             | 95-87-4   | 0.503         |
| Phenol, 2,4-dimethyl-                       | 17.684                             | 105-67-9  | 0.495         |
| Phenol, 2,4,6-trimethyl-                    | 19.614                             | 527-60-6  | 0.353         |
| p-Cumenol                                   | 20.028                             | 99-89-8   | 6.698         |
| Phenol, 2-(1-phenylethyl)-                  | 33.240                             | 4237-44-9 | 0.328         |
| <b>Non identified fraction</b>              | <b><math>\Sigma</math>(%.area)</b> |           | <b>2.790</b>  |

**Table S24:** Classes of compounds, summation of peak areas, CAS number, and retention times of chemical compounds identified by GC-MS in bio-oil by catalytic upgrading of WEEE plastic pyrolysis vapors at 450 °C, 1.0 atm, on a fixed catalyst bed loaded with 7.5%.wt of Si-Al ash pellets, Reaction time=30 min, in semi-pilot scale two-stage reactor of 2.0 L.

| Chemical Compound                                     | RT (min)                          | CAS        | wi(%Area)     |
|-------------------------------------------------------|-----------------------------------|------------|---------------|
| <b>Aromatic Hydrocarbons</b>                          | <b><math>\Sigma</math>(%area)</b> |            | <b>47.895</b> |
| Styrene                                               | 9.728                             | 100-42-5   | 5.944         |
| Benzene, (1-methylethyl)-                             | 10.710                            | 98-82-8    | 3.805         |
| Benzene, propyl-                                      | 11.688                            | 103-65-1   | 0.240         |
| $\alpha$ -Methylstyrene                               | 12.584                            | 98-83-9    | 5.985         |
| Benzene, 1-propenyl-                                  | 14.092                            | 637-50-3   | 0.579         |
| Benzene, n-butyl-                                     | 14.999                            | 104-51-8   | 0.192         |
| 1-Phenyl-1-butene                                     | 16.881                            | 824-90-8   | 0.230         |
| Diphenylmethane                                       | 26.329                            | 101-81-5   | 0.348         |
| Benzene, 1,1'-ethylidenebis-                          | 27.764                            | 612-00-0   | 0.184         |
| Bibenzyl                                              | 28.688                            | 103-29-7   | 0.560         |
| Benzene, 1,1'-(1,3-propanediyl)bis-                   | 32.085                            | 1081-75-0  | 16.847        |
| Benzene, 1,1'-(3-methyl-1-propene-1,3-diyl)bis-       | 32.412                            | 7614-93-9  | 1.920         |
| Benzene, 1,1'-(1-methyl-1,3-propanediyl)bis-          | 32.600                            | 1520-44-1  | 2.243         |
| 1,2-Diphenylcyclopropane                              | 33.636                            | 29881-14-9 | 2.115         |
| Benzene, 1,1'-(1,4-butanediyl)bis-                    | 34.021                            | 1083-56-3  | 0.700         |
| Benzene, 1,1'-(3-methyl-1-propene-1,3-diyl)bis-       | 34.386                            | 7614-93-9  | 1.316         |
| 2,4-Diphenyl-4-methyl-1-pentene                       | 34.746                            |            | 0.919         |
| Benzene, 1,1'-(2-methyl-1-propenylidene)bis-          | 34.898                            | 781-33-9   | 2.023         |
| 1-(4-Methylphenyl)-4-phenylbuta-1,3-diene             | 36.410                            | 37985-11-8 | 0.522         |
| 1-Propene, 3-(2-cyclopentenyl)-2-methyl-1,1-diphenyl- | 49.300                            |            | 0.390         |
| 1-Propene, 3-(2-cyclopentenyl)-2-methyl-1,1-diphenyl- | 53.449                            | -          | 0.833         |
| <b>Polycyclic aromatic hydrocarbons (PAH)</b>         | <b><math>\Sigma</math>(%area)</b> |            | <b>5.754</b>  |
| Naphthalene                                           | 19.491                            | 91-20-3    | 0.543         |
| Naphthalene, 1-methyl-                                | 22.770                            | 90-12-0    | 0.325         |
| Naphthalene, 2-methyl-                                | 23.259                            | 91-57-6    | 0.475         |
| Naphthalene, 1,2,3,4-tetrahydro-1-phenyl-             | 34.473                            | 3018-20-0  | 0.524         |
| Naphthalene, 1-phenyl-                                | 36.578                            | 605-02-7   | 2.901         |
| Naphthalene, 2-phenyl-                                | 40.017                            | 612-94-2   | 0.395         |
| Naphthalene, 2-(phenylmethyl)-                        | 44.292                            | 613-59-2   | 0.591         |
| <b>Nitrogenated Compounds</b>                         | <b><math>\Sigma</math>(%area)</b> |            | <b>26.138</b> |
| Benzyl nitrile                                        | 17.566                            | 140-29-4   | 0.420         |
| Benzeneacetonitrile, $\alpha$ -methyl-                | 18.434                            | 1823-91-2  | 0.820         |
| Benzenepropanenitrile                                 | 20.642                            | 645-59-0   | 0.384         |
| 1,2-Benzenedicarbonitrile                             | 21.233                            | 91-15-6    | 0.333         |
| Cyclopropanecarbonitrile, 2-phenyl-, trans-           | 22.408                            | 5590-14-7  | 0.317         |
| Benzenebutanenitrile                                  | 23.461                            | 2046-18-6  | 17.247        |
| quinoline, 1,2-dihydro-1-methyl-2-methylene-          | 24.133                            |            | 0.977         |

|                                                              |                                    |            |               |
|--------------------------------------------------------------|------------------------------------|------------|---------------|
| 3-Benzyl-4,5-dihydro-3H-pyrrole                              | 24.347                             | -          | 2.040         |
| 1,2,3,3a-Tetrahydropentalene, 1,1-dimethyl-3-cyanomethylene- | 24.851                             | -          | 0.296         |
| Cyclopropanecarbonitrile, 2-phenyl-, trans-                  | 25.768                             | 5590-14-7  | 0.491         |
| 1H-Pyrrole, 1-(4-methylphenyl)-                              | 26.122                             | 827-60-1   | 0.648         |
| Naphthalene, 1-isocyano-                                     | 28.187                             | 09/04/1984 | 0.684         |
| 1-Naphthaleneacetonitrile                                    | 32.306                             | 132-75-2   | 0.689         |
| Octadecanenitrile                                            | 43.046                             | 638-65-3   | 0.792         |
| <b>Brominated Compounds</b>                                  | <b><math>\Sigma</math>(%.area)</b> |            | <b>0.565</b>  |
| Phenol, 2-bromo-                                             | 15.591                             | 95-56-7    | 0.290         |
| 5-Bromo-2-methoxy-1,3-dimethylbenzene                        | 23.559                             | -          | 0.275         |
| <b>Oxygenated Compounds</b>                                  | <b><math>\Sigma</math>(%.area)</b> |            | <b>17.248</b> |
| Phenol                                                       | 12.146                             | 108-95-2   | 4.751         |
| Phenol, 2-methyl-                                            | 14.630                             | 95-48-7    | 0.743         |
| p-Cresol                                                     | 15.269                             | 106-44-5   | 0.366         |
| Benzenemethanol, $\alpha,\alpha$ -dimethyl-                  | 15.905                             | 617-94-7   | 1.479         |
| Phenol, 2,5-dimethyl-                                        | 16.580                             | 95-87-4    | 0.471         |
| Phenol, 2,4-dimethyl-                                        | 17.684                             | 105-67-9   | 0.390         |
| Phenol, 2,4,6-trimethyl-                                     | 19.614                             | 527-60-6   | 0.359         |
| p-Cumenol                                                    | 20.028                             | 99-89-8    | 8.025         |
| Phenol, 2-(1-phenylethyl)-                                   | 33.240                             | 4237-44-9  | 0.333         |
| Benzaldehyde, 2-methyl-, (2,4-dinitrophenyl)hydrazone        | 50.779                             | 1773-44-0  | 0.331         |
| <b>Non identified fraction</b>                               | <b><math>\Sigma</math>(%.area)</b> |            | <b>2.397</b>  |



**Table S25:** Classes of compounds, summation of peak areas, CAS number, and retention times of chemical compounds identified by GC-MS in bio-oil by catalytic upgrading of WEEE plastic pyrolysis vapors at 450 °C, 1.0 atm, on a fixed catalyst bed loaded with 7.5%.wt of Si-Al ash pellets, Reaction time=45 min, in semi-pilot scale two-stage reactor of 2.0 L.

| Chemical Compound                                     | RT (min)                          | CAS        | wi(%Area)     |
|-------------------------------------------------------|-----------------------------------|------------|---------------|
| <b>Aromatic Hydrocarbons</b>                          | <b><math>\Sigma</math>(%area)</b> |            | <b>47.737</b> |
| Styrene                                               | 9.728                             | 100-42-5   | 6.400         |
| Benzene, (1-methylethyl)-                             | 10.710                            | 98-82-8    | 3.868         |
| Benzene, propyl-                                      | 11.688                            | 103-65-1   | 0.227         |
| $\alpha$ -Methylstyrene                               | 12.584                            | 98-83-9    | 4.881         |
| Benzene, 1-propenyl-                                  | 14.092                            | 637-50-3   | 0.443         |
| Diphenylmethane                                       | 26.329                            | 101-81-5   | 0.477         |
| Benzene, 1,1'-ethylidenebis-                          | 27.764                            | 612-00-0   | 0.308         |
| Bibenzyl                                              | 28.688                            | 103-29-7   | 0.542         |
| Benzene, 1,1'-(1,3-propanediyl)bis-                   | 32.085                            | 1081-75-0  | 15.362        |
| Benzene, 1,1'-(3-methyl-1-propene-1,3-diyl)bis-       | 32.412                            | 7614-93-9  | 1.731         |
| Benzene, 1,1'-(1-methyl-1,3-propanediyl)bis-          | 32.600                            | 1520-44-1  | 2.380         |
| 1,2-Diphenylcyclopropane                              | 33.636                            | 29881-14-9 | 2.852         |
| Benzene, 1,1'-(1,4-butanediyl)bis-                    | 34.021                            | 1083-56-3  | 0.833         |
| Benzene, 1,1'-(3-methyl-1-propene-1,3-diyl)bis-       | 34.386                            | 7614-93-9  | 1.307         |
| Benzene, 1,1'-(2-methyl-1-propenylidene)bis-          | 34.898                            | 781-33-9   | 2.097         |
| 1-(4-Methylphenyl)-4-phenylbuta-1,3-diene             | 36.410                            | 37985-11-8 | 0.755         |
| Benzene, (1-methylhexadecyl)-                         | 43.880                            | 55125-25-2 | 1.146         |
| p-Terphenyl                                           | 45.433                            | 92-94-4    | 0.298         |
| 1-Propene, 3-(2-cyclopentenyl)-2-methyl-1,1-diphenyl- | 49.300                            |            | 0.729         |
| 1-Propene, 3-(2-cyclopentenyl)-2-methyl-1,1-diphenyl- | 53.449                            | -          | 1.101         |
| <b>Polycyclic aromatic hydrocarbons (PAH)</b>         | <b><math>\Sigma</math>(%area)</b> |            | <b>10.210</b> |
| Naphthalene                                           | 19.491                            | 91-20-3    | 0.442         |
| Naphthalene, 1-methyl-                                | 22.770                            | 90-12-0    | 0.253         |
| Naphthalene, 2-methyl-                                | 23.259                            | 91-57-6    | 0.386         |
| Naphthalene, 1,2,3,4-tetrahydro-1-phenyl-             | 34.473                            | 3018-20-0  | 0.686         |
| Naphthalene, 1-phenyl-                                | 36.578                            | 605-02-7   | 5.094         |
| Naphthalene, 2-phenyl-                                | 40.017                            | 612-94-2   | 1.356         |
| Naphthalene, 2-(phenylmethyl)-                        | 44.292                            | 613-59-2   | 1.993         |
| <b>Nitrogenated Compounds</b>                         | <b><math>\Sigma</math>(%area)</b> |            | <b>23.199</b> |
| Benzyl nitrile                                        | 17.566                            | 140-29-4   | 0.207         |
| Benzeneacetonitrile, $\alpha$ -methyl-                | 18.434                            | 1823-91-2  | 0.501         |
| Benzenepropanenitrile                                 | 20.642                            | 645-59-0   | 0.307         |
| 1,2-Benzenedicarbonitrile                             | 21.233                            | 91-15-6    | 0.257         |
| Cyclopropanecarbonitrile, 2-phenyl-, trans-           | 22.408                            | 5590-14-7  | 0.197         |
| Benzenebutanenitrile                                  | 23.461                            | 2046-18-6  | 11.814        |
| quinoline, 1,2-dihydro-1-methyl-2-methylene-          | 24.133                            |            | 0.668         |
| 3-Benzyl-4,5-dihydro-3H-pyrrole                       | 24.347                            | -          | 1.524         |

|                                                                                       |                                    |             |               |
|---------------------------------------------------------------------------------------|------------------------------------|-------------|---------------|
| 1,2,3,3a-Tetrahydropentalene, 1,1-dimethyl-3-cyanomethylene-                          | 24.851                             | -           | 0.343         |
| Cyclopropanecarbonitrile, 2-phenyl-, trans-                                           | 25.768                             | 5590-14-7   | 0.228         |
| 1H-Pyrrole, 1-(4-methylphenyl)-                                                       | 26.122                             | 827-60-1    | 0.346         |
| Naphthalene, 1-isocyano-                                                              | 28.187                             | 09/04/1984  | 0.858         |
| Naphthalene, 1-isocyano-                                                              | 28.899                             | 09/04/1984  | 0.302         |
| 1-Naphthaleneacetonitrile                                                             | 32.306                             | 132-75-2    | 1.033         |
| Tricyclo[4.3.3.0(1,6)]dodeca-7,11-diene-7,12-dicarbonitrile                           | 38.978                             | 119657-40-8 | 0.257         |
| Octadecanenitrile                                                                     | 43.046                             | 638-65-3    | 2.002         |
| (1-Benzyl-2-O-tolyl-ethyl)-isonitrile                                                 | 44.449                             |             | 1.195         |
| Naphthalene-1,3,3-tricarbonitrile, 3,4,4a,5,6,7-hexahydro-2-amino-4-(4-methylphenyl)- | 49.680                             | 163978-39-0 | 0.731         |
| Acridine, 9-phenyl-                                                                   | 51.605                             | 602-56-2    | 0.429         |
| <b>Oxygenated Compounds</b>                                                           | <b><math>\Sigma</math>(%.area)</b> |             | <b>12.002</b> |
| Phenol                                                                                | 12.146                             | 108-95-2    | 2.855         |
| Phenol, 2-methyl-                                                                     | 14.630                             | 95-48-7     | 0.423         |
| Benzenemethanol, $\alpha,\alpha$ -dimethyl-                                           | 15.905                             | 617-94-7    | 0.979         |
| Phenol, 2,5-dimethyl-                                                                 | 16.580                             | 95-87-4     | 0.272         |
| Phenol, 2,4-dimethyl-                                                                 | 17.684                             | 105-67-9    | 0.195         |
| Phenol, 2,4,6-trimethyl-                                                              | 19.614                             | 527-60-6    | 0.154         |
| p-Cumenol                                                                             | 20.028                             | 99-89-8     | 4.759         |
| Phenol, 2-(1-phenylethyl)-                                                            | 33.240                             | 4237-44-9   | 0.346         |
| 3-Pentanone, 1,5-diphenyl-                                                            | 36.946                             | 5396-91-8   | 0.369         |
| 2,3-Dimethyl-1,4,4a,9a-tetrahydroanthracene-9,10-dione                                | 37.227                             | 2670-23-7   | 0.323         |
| Benzaldehyde, 2-methyl-, (2,4-dinitrophenyl)hydrazone                                 | 50.779                             | 1773-44-0   | 1.327         |
| <b>Non identified fraction</b>                                                        | <b><math>\Sigma</math>(%.area)</b> |             | <b>6.852</b>  |

**Table S26:** Classes of compounds, summation of peak areas, CAS number, and retention times of chemical compounds identified by GC-MS in bio-oil by catalytic upgrading of WEEE plastic pyrolysis vapors at 450 °C, 1.0 atm, on a fixed catalyst bed loaded with 7.5%.wt of Si-Al ash pellets, Reaction time=60 min, in semi-pilot scale two-stage reactor of 2.0 L.

| Chemical Compound                                            | RT (min)        | CAS        | wi(%Area)     |
|--------------------------------------------------------------|-----------------|------------|---------------|
| <b>Aromatic Hydrocarbons</b>                                 | <b>Σ(%area)</b> |            | <b>54.202</b> |
| Styrene                                                      | 9.728           | 100-42-5   | 9.689         |
| Benzene, (1-methylethyl)-                                    | 10.710          | 98-82-8    | 5.744         |
| Benzene, propyl-                                             | 11.688          | 103-65-1   | 0.318         |
| α-Methylstyrene                                              | 12.584          | 98-83-9    | 7.672         |
| Benzene, 1-propenyl-                                         | 14.092          | 637-50-3   | 0.624         |
| Benzene, 1-ethynyl-4-methyl-                                 | 14.857          | 766-97-2   | 0.440         |
| Biphenyl                                                     | 25.023          | 92-52-4    | 0.594         |
| Diphenylmethane                                              | 26.329          | 101-81-5   | 0.681         |
| Benzene, 1,1'-ethylidenebis-                                 | 27.764          | 612-00-0   | 0.677         |
| Bibenzyl                                                     | 28.688          | 103-29-7   | 0.525         |
| Benzene, 1,1'-(1,3-propanediyl)bis-                          | 32.085          | 1081-75-0  | 15.732        |
| Benzene, 1,1'-(3-methyl-1-propene-1,3-diyl)bis-              | 32.412          | 7614-93-9  | 2.083         |
| Benzene, 1,1'-(1-methyl-1,3-propanediyl)bis-                 | 32.600          | 1520-44-1  | 2.111         |
| 1,2-Diphenylcyclopropane                                     | 33.636          | 29881-14-9 | 2.747         |
| Benzene, 1,1'-(1,4-butanediyl)bis-                           | 34.021          | 1083-56-3  | 0.788         |
| Benzene, 1,1'-(3-methyl-1-propene-1,3-diyl)bis-              | 34.386          | 7614-93-9  | 0.840         |
| Benzene, 1,1'-(2-methyl-1-propenylidene)bis-                 | 34.898          | 781-33-9   | 1.217         |
| 1-(4-Methylphenyl)-4-phenylbuta-1,3-diene                    | 36.410          | 37985-11-8 | 0.663         |
| 1,1':3',1''-Terphenyl, 5'-phenyl-                            | 68.132          | 612-71-5   | 1.057         |
| <b>Polycyclic aromatic hydrocarbons (PAH)</b>                | <b>Σ(%area)</b> |            | <b>11.226</b> |
| Naphthalene                                                  | 19.491          | 91-20-3    | 1.199         |
| Naphthalene, 1-methyl-                                       | 22.770          | 90-12-0    | 0.581         |
| Naphthalene, 2-methyl-                                       | 23.259          | 91-57-6    | 0.959         |
| Naphthalene, 1,4-dimethyl-                                   | 26.202          | 571-58-4   | 0.719         |
| Naphthalene, 1,2,3,4-tetrahydro-1-phenyl-                    | 34.473          | 3018-20-0  | 0.732         |
| Naphthalene, 1-phenyl-                                       | 36.578          | 605-02-7   | 2.801         |
| Naphthalene, 2-phenyl-                                       | 40.017          | 612-94-2   | 2.281         |
| Naphthalene, 2-(phenylmethyl)-                               | 44.292          | 613-59-2   | 1.954         |
| <b>Nitrogenated Compounds</b>                                | <b>Σ(%area)</b> |            | <b>21.372</b> |
| Benzyl nitrile                                               | 17.566          | 140-29-4   | 0.265         |
| Benzeneacetonitrile, α-methyl-                               | 18.434          | 1823-91-2  | 0.738         |
| 1,2-Benzenedicarbonitrile                                    | 21.233          | 91-15-6    | 0.415         |
| Benzenebutanenitrile                                         | 23.461          | 2046-18-6  | 14.489        |
| quinoline, 1,2-dihydro-1-methyl-2-methylene-                 | 24.133          |            | 0.503         |
| 3-Benzyl-4,5-dihydro-3H-pyrrole                              | 24.347          | -          | 1.457         |
| 1,2,3,3a-Tetrahydropentalene, 1,1-dimethyl-3-cyanomethylene- | 24.851          | -          | 0.490         |
| Naphthalene, 1-isocyano-                                     | 28.187          | 09/04/1984 | 1.047         |

|                                                                                       |                                    |             |               |
|---------------------------------------------------------------------------------------|------------------------------------|-------------|---------------|
| Naphthalene, 1-isocyano-                                                              | 28.899                             | 09/04/1984  | 0.606         |
| 1-Naphthaleneacetonitrile                                                             | 32.306                             | 132-75-2    | 0.847         |
| Naphthalene-1,3,3-tricarbonitrile, 3,4,4a,5,6,7-hexahydro-2-amino-4-(4-methylphenyl)- | 49.680                             | 163978-39-0 | 0.515         |
| <b>Oxygenated Compounds</b>                                                           | <b><math>\Sigma</math>(%.area)</b> |             | <b>10.629</b> |
| Phenol                                                                                | 12.146                             | 108-95-2    | 4.159         |
| Phenol, 2-methyl-                                                                     | 14.630                             | 95-48-7     | 0.560         |
| Phenol, 2,5-dimethyl-                                                                 | 16.580                             | 95-87-4     | 0.339         |
| p-Cumenol                                                                             | 20.028                             | 99-89-8     | 4.178         |
| Phenol, 2-(1-phenylethyl)-                                                            | 33.240                             | 4237-44-9   | 0.269         |
| Benzaldehyde, 2-methyl-, (2,4-dinitrophenyl)hydrazone                                 | 50.779                             | 1773-44-0   | 1.124         |
| <b>Non identified fraction</b>                                                        | <b><math>\Sigma</math>(%.area)</b> |             | <b>2.574</b>  |
